# Supplementary material
Source: PubMed Central journal article supplement (PMC3495072)

## Supporting Information

# Tempering the Reactivities of $\alpha$ -Oxo Gold Carbenes by Bidentate Ligands: Implication of Tricoordinated Gold Intermediates and the Development of an Expedient [3+2] Assembly of 2,4-Disubstituted Oxazoles

Yingdong Luo,<sup>†</sup> Kegong Ji,<sup>†</sup> Yuxue Li<sup>‡</sup> and Liming Zhang<sup>†\*</sup>

*Department of Chemistry and Biochemistry, University of California,  
Santa Barbara, California 93106<sup>†</sup>*

*State Key Laboratory of Organometallic Chemistry, Shanghai Institute  
of Organic Chemistry, Ling Ling Road 345, Shanghai 200032, China<sup>‡</sup>*

| <b>Contents</b>                                                           | <b>Page number</b> |
|---------------------------------------------------------------------------|--------------------|
| <b>General</b>                                                            | S2                 |
| <b>Ligand synthesis:</b>                                                  | S2                 |
| <b>Gold-catalyzed synthesis of oxazole: General procedures A, B, C, D</b> | S4                 |
| <b>DFT studies</b>                                                        | S13                |
| <b>References</b>                                                         | S21                |
| <b><sup>1</sup>H and <sup>13</sup>C NMR spectra</b>                       | S22                |

**General.** Ethyl acetate (ACS grade), hexanes (ACS grade), diethyl ether (ACS grade) and anhydrous 1, 2-dichloroethane (HPLC grade) were purchased from Fisher Scientific and used without further purification. Chlorobenzene (HPLC grade) was purchased from Acros without further purification. Methylene chloride and tetrahydrofuran were purified using MBraun Solvent Purifier. Commercially available reagents were used without further purification. Reactions were monitored by thin layer chromatography (TLC) using Sorbent Technologies' pre-coated silica gel plates. Flash column chromatography was performed over Sorbent Technologies' silica gel (230-400 mesh).  $^1\text{H}$  NMR and  $^{13}\text{C}$  NMR spectra were recorded on Varian 400 MHz, 500 MHz and 600 MHz spectrometers using residue solvent peaks as internal standards. Infrared spectra were recorded with a Perkin Elmer FT-IR spectrum 2000 spectrometer and are reported in reciprocal centimeter ( $\text{cm}^{-1}$ ). Mass spectra were recorded with Micromass QTOF2 Quadrupole/Time-of-Flight Tandem mass spectrometer using electron spray ionization or Waters GCT Premier time-of-flight mass spectrometer with a field ionization (FI) ion source.

**L1** is known compound and was prepared according to the literature procedure.<sup>1</sup>

#### **L1AuCl**

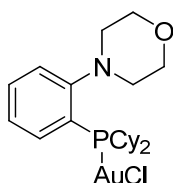

This complex was prepared quantitatively by stirring the ligand with an equivalent of  $\text{Me}_2\text{SAuCl}$  followed by simple concentration under vacuum.  $^1\text{H}$  NMR (500 MHz,  $\text{CDCl}_3$ )  $\delta$  7.75 – 7.67 (m, 1H), 7.56 (t,  $J = 7.6$  Hz, 1H), 7.47 (dd,  $J = 7.2, 4.2$  Hz, 1H), 7.31 (t,  $J = 7.5$  Hz, 1H), 4.11-4.09 (m, 2H), 3.92-3.90 (m, 2H), 3.05-3.03 (m, 2H), 2.80 – 2.65 (m, 2H), 2.39 (q,  $J = 12.0$  Hz, 2H), 2.08 (d,  $J = 12.0$  Hz, 2H), 1.91 – 1.81 (m, 2H), 1.73 (d,  $J = 8.0$  Hz, 2H), 1.66 (d,  $J = 8.7$  Hz, 2H), 1.57-1.48 (m, 4H), 1.34-1.27 (m, 4H), 1.25 – 1.10 (m, 4H).  $^{13}\text{C}$  NMR (126 MHz,  $\text{CDCl}_3$ )  $\delta$  157.11, 136.27, 133.05 (d,  $J_{\text{PC}} = 2.0$  Hz), 126.42 (d,  $J_{\text{PC}} = 10.2$  Hz), 125.76 (d,  $J_{\text{PC}} = 5.7$  Hz), 124.60 (d,  $J_{\text{PC}} = 55.0$  Hz), 66.80, 54.72, 36.20 (d,  $J_{\text{PC}} = 34.0$  Hz), 30.86 (d,  $J_{\text{PC}} = 3.1$  Hz), 30.09, 26.57, (d,  $J_{\text{PC}} = 18.0$  Hz), 26.52 (d,  $J_{\text{PC}} = 16.2$  Hz), 25.58. IR ( $\text{cm}^{-1}$ ): 2929, 2852, 1569, 1449, 1180, 1114, 1002, 731. ESI  $[\text{M}+\text{Na}]^+$ : 614.16

#### **Di-tert-butyl-(2-tert-butylsulfanylphenyl)phosphine (L3):**

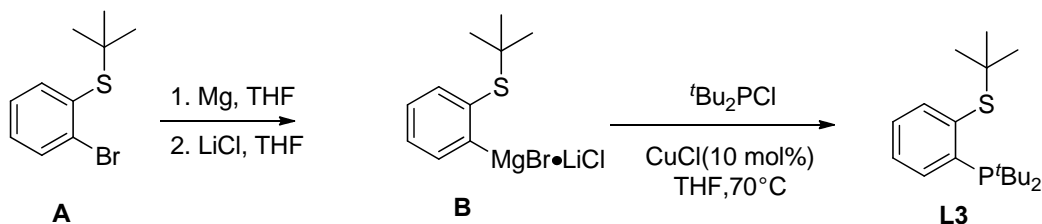

Under argon atmosphere a 10 mL Schlenk tube equipped with a magnetic stir bar was charged with Mg (2.2 mmol) and THF(0.5 mL). To this vigorously stirred mixture was added the aryl bromide **A** in THF (0.2 mL out of a 1.5 mL THF solution with 2 mmol of **A** dissolved). The Grignard reaction was initiated upon heating the reaction mixture to reflux, and the remaining aryl bromide **A** was added slowly while maintaining refluxing. Upon the completion of the addition, the reaction mixture was further stirred for 1 h at ambient temperature before the introduction of LiCl (2 mmol) under argon. The resulting mixture was stirred for 30 min at room temperature before the addition of *t*Bu<sub>2</sub>PCl (1.8 mmol, 0.9 equiv) and CuCl (0.2 mmol, 0.1 equiv). The reaction was then stirred at 70 °C for 8 h. The reaction was quenched by the addition of aqueous NH<sub>4</sub>OH, and the resulting mixture was extracted with diethyl ether. The combined organic layers were dried with Na<sub>2</sub>SO<sub>4</sub> and concentrated under vacuum. The residue thus obtained was purified by silica gel flash column chromatography using a mixture of diethyl ether/pentane as the eluent to afford the the desired ligand in 65% yield. <sup>1</sup>H NMR (500 MHz, CDCl<sub>3</sub>) δ 7.86 – 7.77 (m, 1H), 7.66 (ddd, *J* = 6.2, 4.0, 2.2 Hz, 1H), 7.26 (q, *J* = 3.2 Hz, 2H), 1.39 (s, 9H), 1.21 (s, 9H), 1.18 (s, 9H). <sup>13</sup>C NMR (126 MHz, CDCl<sub>3</sub>) δ 143.11(d, *J*<sub>PC</sub> = 23.8 Hz), 142.89 (d, *J*<sub>PC</sub> = 32.5 Hz), 136.82 (d, *J*<sub>PC</sub> = 3.3 Hz), 135.78 (d, *J*<sub>PC</sub> = 2.7 Hz), 128.02 , 126.02 , 47.82 , 33.04 (d, *J*<sub>PC</sub> = 26.2 Hz), 31.62 (d, *J*<sub>PC</sub> = 1.1 Hz), 30.66 (d, *J*<sub>PC</sub> = 15.2 Hz). <sup>31</sup>P NMR (162 MHz, CDCl<sub>3</sub>) δ 21.42. IR(cm<sup>-1</sup>):3393, 2961, 2894, 1643,1474, 1363, 1171, 1042, 808, 756. Found ESI [M+H]<sup>+</sup>:311.15

### L3AuCl

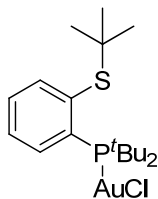

This complex was prepared quantitatively by stirring the ligand with an equivalent of Me<sub>2</sub>SAuCl followed by simple concentration under vacuum. <sup>1</sup>H NMR (500 MHz, CDCl<sub>3</sub>) δ 7.86 (td, *J* = 7.1, 2.0 Hz, 2H), 7.47 (t, *J* = 7.1 Hz, 2H), 1.50 (s, 9H), 1.42 (s, 9H), 1.38 (s, 9H). <sup>13</sup>C NMR (126 MHz, CDCl<sub>3</sub>) δ 140.87 (d, *J*<sub>PC</sub> = 8.4 Hz), 139.87 (d, *J*<sub>PC</sub> = 4.7 Hz), 134.54 (d, *J*<sub>PC</sub> = 3.0 Hz), 132.09 (d, *J*<sub>PC</sub> = 49.4 Hz), 130.38 , 127.40 , 51.93 , 37.75 (d, *J*<sub>PC</sub> = 24.1 Hz), 31.48 , 30.75 (d, *J*<sub>PC</sub> = 7.0 Hz). <sup>31</sup>P NMR (162 MHz, CDCl<sub>3</sub>) δ 61.40. IR(cm<sup>-1</sup>): 2960, 2900, 2865, 1474, 1459, 1367, 1164, 916, 768, 730. ESI [M+Na]<sup>+</sup>:565.13

### Dicyclohexyl-(2-isopropylsulfanylphenyl)phosphine (L2)

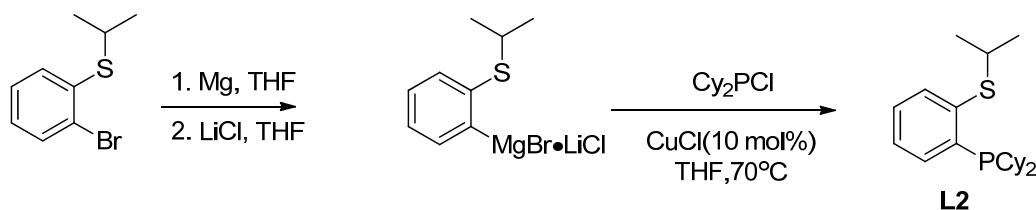

This Ligand **L2** was prepared in 73% yield following the same procedure as that for **L3** except that Cy<sub>2</sub>PCL was used instead of <sup>t</sup>Bu<sub>2</sub>PCL. <sup>1</sup>H NMR (600 MHz, CDCl<sub>3</sub>) δ 7.39 – 7.34 (m, 2H), 7.27 – 7.23 (m, 1H), 7.14 (t, *J* = 7.4 Hz, 1H), 3.49 (p, *J* = 6.6 Hz, 1H), 1.90 (q, *J* = 14.0, 10.5 Hz, 4H), 1.76 (d, *J* = 12.5 Hz, 2H), 1.64 (t, *J* = 14.9 Hz, 4H), 1.55 (d, *J* = 13.0 Hz, 2H), 1.32 (d, *J* = 6.7 Hz, 6H), 1.29 – 1.01 (m, 10H). <sup>13</sup>C NMR (151 MHz, CDCl<sub>3</sub>) δ 145.03 (d, *J*<sub>PC</sub> = 28.7 Hz), 136.14 (d, *J*<sub>PC</sub> = 16.2 Hz), 132.96, 129.26 (d, *J*<sub>PC</sub> = 4.8 Hz), 128.75, 124.74, 37.72 (d, *J*<sub>PC</sub> = 9.3 Hz), 33.95 (d, *J*<sub>PC</sub> = 13.9 Hz), 30.17 (d, *J*<sub>PC</sub> = 16.2 Hz), 28.99 (d, *J*<sub>PC</sub> = 9.0 Hz), 27.21 (d, *J*<sub>PC</sub> = 18.0 Hz), 27.14 (d, *J*<sub>PC</sub> = 16.2 Hz), 26.37, 22.81. <sup>31</sup>P NMR (162 MHz, CDCl<sub>3</sub>) δ -12.43. IR (cm<sup>-1</sup>): 2924, 2850, 1639, 1446, 1365, 1236, 915, 745. Found ESI [M+H]<sup>+</sup>: 349.19

### L2AuCl

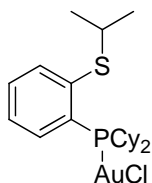

This complex was prepared quantitatively by stirring the ligand with an equivalent of Me<sub>2</sub>SAuCl followed by simple concentration under vacuum. <sup>1</sup>H NMR (500 MHz, CDCl<sub>3</sub>) δ 7.76 (s, 1H), 7.56 (s, 1H), 7.45 (t, *J* = 7.8 Hz, 1H), 7.30 (s, 1H), 3.75 – 3.63 (m, 1H), 2.70 (s, 2H), 2.51 (s, 2H), 2.08 (d, *J* = 11.7 Hz, 2H), 1.86 (d, *J* = 10.9 Hz, 2H), 1.79 – 1.63 (m, 4H), 1.53 (s, 2H), 1.41 (d, *J* = 6.6 Hz, 6H), 1.37 – 1.11 (m, 8H). <sup>13</sup>C NMR (151 MHz, CDCl<sub>3</sub>) δ 142.20(br), 136.37(br), 133.07 (br), 131.42, 127.20 (d, *J*<sub>PC</sub> = 54.4 Hz), 126.18, 41.01(br), 35.18 (d, *J*<sub>PC</sub> = 33.1 Hz), 30.93, 29.26, 26.48 (d, *J*<sub>PC</sub> = 3.9 Hz), 26.39 (d, *J*<sub>PC</sub> = 5.9 Hz), 25.55, 22.67. <sup>31</sup>P NMR (162 MHz, CDCl<sub>3</sub>) δ (br, 54.16-36.62). IR (cm<sup>-1</sup>): 2929, 2853, 1448, 1239, 1202, 916, 731. ESI [M+Na]<sup>+</sup>: 603.14

## Gold-catalyzed synthesis of oxazole

### General procedure A:

To a 3 dram vial containing 2 mL of chlorobenzene were added sequentially a carboxamide (0.2 mmol), an alkyne (0.3 mmol), Mor-DalPhosAuCl (0.01 mmol) and NaBAr<sup>F</sup><sub>4</sub> (0.02 mmol). The resulting mixture was stirred and heated to 60 °C. To this vial a solution of 8-methylquinoline *N*-oxide (64 mg, 0.4 mmol) in 4 mL of chlorobenzene was then added via a syringe pump in 16 h. Upon completion, the reaction mixture was further stirred for 6 h before concentration under vacuum. The resulting residue was purified by silica gel flash chromatography.

### General procedure B:

A solution of 8-methylquinoline *N*-oxide (96 mg, 0.6 mmol) in 4 ml of chlorobenzene was added by syringe pump within 16 h to a 60 °C solution of amide (0.2 mmol), alkyne (0.4 mmol), Mor-DalPhosAuCl (0.01 mmol) and NaBAr<sup>F</sup><sub>4</sub> (0.02 mmol) in 2



ml chlorobenzene. Upon completion, the reaction mixture was further stirred for 6 h before concentration under vacuum. The resulting residue was purified by silica gel flash chromatography.

#### General procedure C:

A solution of 8-methylquinoline *N*-oxide (64 mg, 0.4 mmol) and an alkyne (0.3 mmol) in 4 ml of chlorobenzene was added by syringe pump within 16 h to a 60 °C solution of amide (0.2 mmol), Mor-DalPhosAuCl (0.01 mmol) and NaBAr<sup>F</sup><sub>4</sub> (0.02 mmol) in 2 ml chlorobenzene. Upon completion, the reaction mixture was further stirred for 6 h before concentration under vacuum. The resulting residue was purified by silica gel flash chromatography.

#### General procedure D:

A solution of 8-methylquinoline *N*-oxide (64 mg, 0.4 mmol) in 4 ml of chlorobenzene was added via a syringe pump within 16 h to a 100 °C solution of amide (0.2 mmol), alkyne (0.3 mmol), Mor-DalPhosAuCl (0.01 mmol) and NaBAr<sup>F</sup><sub>4</sub> (0.02 mmol) in 2 ml chlorobenzene. Upon completion, the reaction mixture was further stirred for 6 h before concentration under vacuum. The resulting residue was purified by silica gel flash chromatography..

#### 4-decyl-2-(4-methoxyphenyl)oxazole (3a)

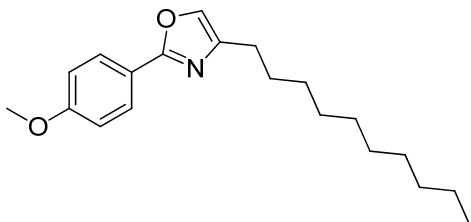

This compound was prepared in 81 % yield according to the general procedure A. <sup>1</sup>H NMR (500 MHz, CDCl<sub>3</sub>) δ 7.95 (d, *J* = 8.9 Hz, 2H), 7.36 (s, 1H), 6.95 (d, *J* = 8.9 Hz, 2H), 3.85 (s, 3H), 2.56 (t, *J* = 7.7 Hz, 2H), 1.72 – 1.62 (m, 2H), 1.42 – 1.22 (m, 14H), 0.88 (t, *J* = 6.9 Hz, 3H); <sup>13</sup>C NMR (125 MHz, CDCl<sub>3</sub>) δ 161.38, 161.10, 142.34, 133.23, 127.89, 120.65, 114.07, 55.34, 31.90, 29.60, 29.58, 29.41, 29.32, 28.40, 26.53, 22.68, 14.11.; IR(neat): 3131, 3045, 2922, 2851, 1657, 1616, 1561, 1468, 1406, 1257, 1109, 1033.; MS(ES<sup>+</sup>) Calculated for [C<sub>20</sub>H<sub>30</sub>NO<sub>2</sub>]<sup>+</sup>: 316.23; Found: 316.24.

#### 4-decyl-2-(*p*-tolyl)oxazole (3b)

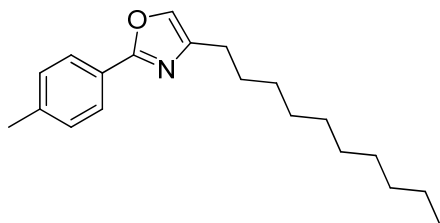

This compound was prepared in 79 % yield according to the general procedure A.  $^1\text{H}$  NMR (500 MHz,  $\text{CDCl}_3$ )  $\delta$  7.91 (d,  $J = 8.2$  Hz, 2H), 7.38 (s, 1H), 7.24 (d,  $J = 8.1$  Hz, 2H), 2.57 (t,  $J = 7.6$  Hz, 2H), 2.39 (s, 3H), 1.72 – 1.63 (m, 2H), 1.43 – 1.19 (m, 14H), 0.88 (t,  $J = 6.9$  Hz, 3H).;  $^{13}\text{C}$  NMR (125 MHz,  $\text{CDCl}_3$ )  $\delta$  161.53, 142.41, 140.30, 133.49, 129.38, 126.24, 125.04, 31.90, 29.60, 29.57, 29.40, 29.32, 29.31, 28.40, 26.51, 22.68, 21.48, 14.11.; IR(neat): 3044, 2921, 2851, 1648, 1468, 1104, 1074, 913, 747, 726. MS( $\text{ES}^+$ ) Calculated for  $[\text{C}_{20}\text{H}_{29}\text{NNO}]^+$ : 322.21; Found: 322.23.

#### 4-decyl-2-phenyloxazole (3c)

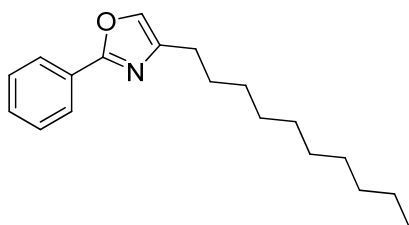

This compound was prepared in 72 % yield according to the general procedure A.  $^1\text{H}$  NMR (500 MHz,  $\text{CDCl}_3$ )  $\delta$  8.04 – 8.01 (m, 2H), 7.47 – 7.40 (m, 4H), 2.60 – 2.56 (m, 2H), 1.68 (m, 2H), 1.42 – 1.22 (m, 14H), 0.88 (t,  $J = 7.0$  Hz, 3H).;  $^{13}\text{C}$  NMR (125 MHz,  $\text{CDCl}_3$ )  $\delta$  161.31, 142.62, 133.82, 130.04, 128.66, 127.76, 126.26, 31.90, 29.60, 29.58, 29.40, 29.32, 29.30, 28.40, 26.51, 22.68, 14.11.; IR(neat): 2926, 2854, 1642, 1590, 1553, 1487, 1449, 1345, 1102, 1062, 1025, 933, 777, 712.; MS( $\text{ES}^+$ ) Calculated for  $[\text{C}_{19}\text{H}_{28}\text{NO}]^+$ : 286.22; Found: 286.23.

#### 2-(4-chlorophenyl)-4-decyloxazole (3d)

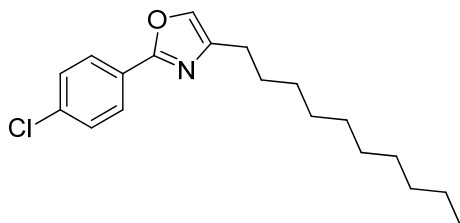

This compound was prepared in 79 % yield according to the general procedure B.  $^1\text{H}$  NMR (500 MHz,  $\text{CDCl}_3$ )  $\delta$  7.97 – 7.93 (m, 2H), 7.44 – 7.39 (m, 3H), 2.57 (t,  $J = 7.7$  Hz, 2H), 1.71 – 1.63 (m, 2H), 1.42 – 1.19 (m, 14H), 0.88 (t,  $J = 6.9$  Hz, 3H).;  $^{13}\text{C}$

NMR (125 MHz, CDCl<sub>3</sub>)  $\delta$  160.39, 142.82, 136.12, 134.06, 128.98, 127.53, 126.25, 31.89, 29.59, 29.56, 29.38, 29.31, 29.28, 28.37, 26.46, 22.67, 14.10.; IR(neat): 2922, 2851, 1468, 1405, 1092, 1065, 839, 736.; MS(ES<sup>+</sup>) Calculated for [C<sub>19</sub>H<sub>27</sub>ClNO]<sup>+</sup>: 320.18; Found: 320.19.

#### 2-(4-bromophenyl)-4-decyloxazole (3e)

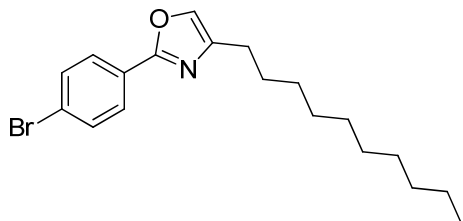

This compound was prepared in 73 % yield according to the general procedure B. <sup>1</sup>H NMR (500 MHz, CDCl<sub>3</sub>)  $\delta$  7.93 – 7.84 (m, 2H), 7.61 – 7.55 (m, 2H), 7.41 (s, 1H), 2.57 (t, *J* = 7.7 Hz, 2H), 1.70 – 1.63 (m, 2H), 1.41 – 1.20 (m, 14H), 0.88 (t, *J* = 6.9 Hz, 3H).; <sup>13</sup>C NMR (125 MHz, CDCl<sub>3</sub>)  $\delta$  160.44, 142.85, 134.10, 131.93, 127.74, 126.66, 124.48, 31.89, 29.59, 29.56, 29.38, 29.31, 29.28, 28.37, 26.45, 22.67, 14.10.; IR(neat): 3135, 3046, 2921, 2850, 1666, 1467, 1401, 1107, 1077, 836, 758.; MS(ES<sup>+</sup>) Calculated for [C<sub>17</sub>H<sub>27</sub>BrNO]<sup>+</sup>: 364.13; Found: 364.14.

#### 4-decyl-2-(4-fluorophenyl)oxazole (3f)

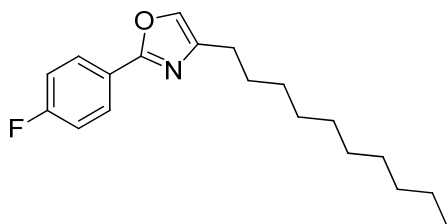

This compound was prepared in 60 % yield according to the general procedure A. <sup>1</sup>H NMR (500 MHz, CDCl<sub>3</sub>)  $\delta$  8.03 – 7.98 (m, 2H), 7.39 (t, *J* = 1.0 Hz, 1H), 7.15 – 7.09 (m, 2H), 2.58 – 2.53 (m, 2H), 1.71 – 1.63 (m, 2H), 1.42 – 1.21 (m, 14H), 0.87 (t, *J* = 7.0 Hz, 3H).; <sup>13</sup>C NMR (126 MHz, CDCl<sub>3</sub>)  $\delta$  164.86, 162.87, 160.50, 142.64, 133.86, 133.85, 128.37, 128.30, 124.15, 124.12, 115.91, 115.74, 31.90, 29.60, 29.57, 29.39, 29.32, 29.29, 28.38, 26.47, 22.68, 14.11.; IR(neat): 3232, 2955, 2920, 2850, 1910, 1601, 1560, 1499, 1469, 1415, 1232, 1064, 935, 844, 738.; MS(ES<sup>+</sup>) Calculated for [C<sub>19</sub>H<sub>26</sub>FNNaO]<sup>+</sup>: 326.19; Found: 326.20.

#### 4-decyl-2-(furan-2-yl)oxazole (3g)

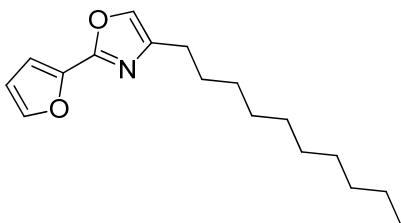

This compound was prepared in 73 % yield according to the general procedure A.  $^1\text{H}$  NMR (500 MHz,  $\text{CDCl}_3$ )  $\delta$  7.53 (dd,  $J = 1.8, 0.7$  Hz, 1H), 7.36 (t,  $J = 1.0$  Hz, 1H), 6.97 (dd,  $J = 3.5, 0.7$  Hz, 1H), 6.51 (dd,  $J = 3.5, 1.8$  Hz, 1H), 2.58 – 2.53 (m, 2H), 1.70 – 1.63 (m, 2H), 1.40 – 1.22 (m, 14H), 0.87 (t,  $J = 7.0$  Hz, 3H).;  $^{13}\text{C}$  NMR (125 MHz,  $\text{CDCl}_3$ )  $\delta$  154.16, 144.11, 143.18, 142.44, 133.31, 111.71, 110.92, 31.89, 29.59, 29.56, 29.37, 29.32, 29.26, 28.31, 26.35, 22.68, 14.11.; IR(neat): 3042, 3039, 2926, 2855, 1636, 1589, 1539, 1450, 1405, 1107, 1010, 895, 741.; MS( $\text{ES}^+$ ) Calculated for  $[\text{C}_{17}\text{H}_{25}\text{NNaO}_2]^+$ : 298.18; Found: 298.18.

#### 4-decyl-2-(thiophen-2-yl)oxazole (3h)

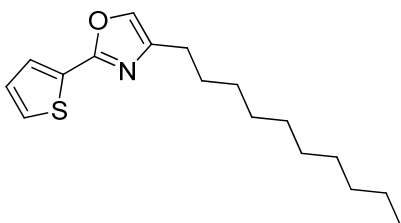

This compound was prepared in 73 % yield according to the general procedure A.  $^1\text{H}$  NMR (500 MHz,  $\text{CDCl}_3$ )  $\delta$  7.64 (dd,  $J = 3.7, 1.0$  Hz, 1H), 7.39 (dd,  $J = 5.0, 1.0$  Hz, 1H), 7.34 (s, 1H), 7.09 (dd,  $J = 5.0, 3.7$  Hz, 1H), 2.55 (t,  $J = 7.5$  Hz, 2H), 1.74 – 1.60 (m, 2H), 1.42 – 1.19 (m, 14H), 0.88 (t,  $J = 6.9$  Hz, 3H).;  $^{13}\text{C}$  NMR (125 MHz,  $\text{CDCl}_3$ )  $\delta$  157.49, 142.61, 133.25, 130.32, 127.85, 127.82, 127.36, 31.89, 29.59, 29.56, 29.38, 29.31, 29.28, 28.35, 26.43, 22.67, 14.10.; IR(neat): 2926, 2854, 1593, 1466, 1425, 1371, 1093, 1004, 853, 703.; MS( $\text{ES}^+$ ) Calculated for  $[\text{C}_{17}\text{H}_{25}\text{NNaOS}]^+$ : 314.16; Found: 314.17.

#### (E)-4-decyl-2-styryloxazole (3i)

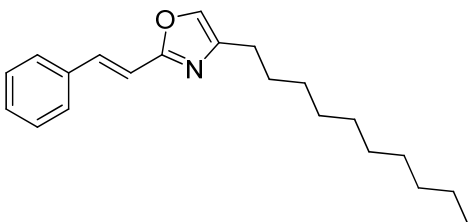

This compound was prepared in 79 % yield according to the general procedure A.  $^1\text{H}$

NMR (500 MHz, CDCl<sub>3</sub>) δ 7.51 (d, *J* = 7.4 Hz, 2H), 7.47 (d, *J* = 16.4 Hz, 1H), 7.37 (t, *J* = 7.4 Hz, 2H), 7.35 – 7.30 (m, 2H), 6.92 (d, *J* = 16.4 Hz, 1H), 2.54 (t, *J* = 7.7 Hz, 2H), 1.70 – 1.62 (m, 2H), 1.42 – 1.20 (m, 13H), 0.88 (t, *J* = 6.9 Hz, 3H).; <sup>13</sup>C NMR (125 MHz, CDCl<sub>3</sub>) δ 161.16, 142.65, 135.63, 135.53, 133.52, 129.00, 128.83, 127.08, 114.11, 31.91, 29.60, 29.57, 29.40, 29.33, 29.29, 28.39, 26.41, 22.69, 14.12.; IR(neat): 3106, 2948, 2922, 2866, 2851, 1590, 1526, 1466, 1447, 967, 752.; MS(ES<sup>+</sup>) Calculated for [C<sub>21</sub>H<sub>29</sub>NNaO]<sup>+</sup>: 334.21; Found: 334.23.

**(E)-4-decyl-2-(prop-1-en-1-yl)oxazole (3j)**

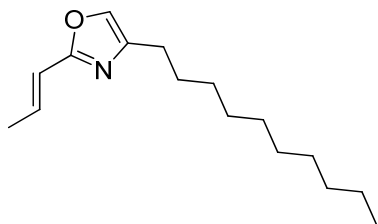

This compound was prepared in 55 % yield according to the general procedure A. <sup>1</sup>H NMR (500 MHz, CDCl<sub>3</sub>) δ 7.23 (s, 1H), 6.67 (dq, *J* = 15.8, 6.9 Hz, 1H), 6.27 (dd, *J* = 15.9, 1.7 Hz, 1H), 2.48 (t, *J* = 7.6 Hz, 2H), 1.91 (dd, *J* = 6.9, 1.7 Hz, 3H), 1.65 – 1.57 (m, 2H), 1.37 – 1.19 (m, 14H), 0.87 (t, *J* = 6.9 Hz, 3H).; <sup>13</sup>C NMR (125 MHz, CDCl<sub>3</sub>) δ 160.89, 141.84, 134.50, 132.86, 118.06, 31.89, 29.58, 29.55, 29.38, 29.31, 29.26, 28.35, 26.34, 22.67, 18.38, 14.10.; IR(neat): 3098, 2959, 2923, 2852, 1718, 1531, 1464, 1405, 1240, 926.; MS(ES<sup>+</sup>) Calculated for [C<sub>16</sub>H<sub>17</sub>NNaO]<sup>+</sup>: 272.20; Found: 272.21.

**4-decyl-2-(2-methylprop-1-en-1-yl)oxazole (3k)**

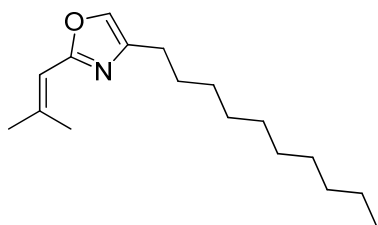

This compound was prepared in 95 % yield according to the general procedure A. <sup>1</sup>H NMR (400 MHz, cdcl<sub>3</sub>) δ 7.24 (s, 1H), 6.07 (s, 1H), 2.49 (t, *J* = 7.6 Hz, 2H), 2.17 (s, 3H), 1.93 (s, 3H), 1.68 – 1.54 (m, 2H), 1.39 – 1.16 (m, 14H), 0.87 (t, *J* = 6.8 Hz, 3H).; <sup>13</sup>C NMR (125 MHz, CDCl<sub>3</sub>) δ 161.30, 144.97, 141.58, 132.14, 112.01, 31.89, 29.59, 29.56, 29.39, 29.31, 29.28, 28.35, 27.11, 26.40, 22.67, 20.31, 14.08.; IR(neat): 2926, 2855, 1721, 1660, 1592, 1546, 1523, 1455, 1377, 1358, 1260, 1104, 983, 837, 800, 738.; MS(ES<sup>+</sup>) Calculated for [C<sub>17</sub>H<sub>29</sub>NNaO]<sup>+</sup>: 286.21; Found: 286.23.

**4-cyclohexyl-2-(4-methoxyphenyl)oxazole (3l)**

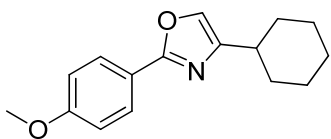

This compound was prepared in 83 % yield according to the general procedure A.  $^1\text{H}$  NMR (500 MHz,  $\text{CDCl}_3$ )  $\delta$  7.97 – 7.92 (m, 1H), 7.31 (s, 1H), 6.97 – 6.91 (m, 1H), 3.84 (s, 1H), 2.62 – 2.50 (m, 1H), 2.09 (t,  $J = 11.7$  Hz, 2H), 1.88 – 1.77 (m, 2H), 1.77 – 1.68 (m, 1H), 1.46 – 1.32 (m, 4H), 1.32 – 1.20 (m, 1H).;  $^{13}\text{C}$  NMR (125MHz,  $\text{CDCl}_3$ )  $\delta$  161.22, 161.04, 147.61, 132.02, 127.90, 120.77, 114.03, 55.32, 36.09, 32.09, 26.16, 26.10.; IR(neat): 2927, 2853, 1614, 1588, 1500, 1464, 1449, 1422, 1344, 1305, 1254, 1172, 1031, 837.; MS( $\text{ES}^+$ ) Calculated for  $[\text{C}_{16}\text{H}_{20}\text{NO}_2]^+$ : 258.15; Found: 258.14.

#### 4-cyclopropyl-2-(4-methoxyphenyl)oxazole (3m)

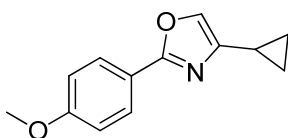

This compound was prepared in 63 % yield according to the general procedure C.  $^1\text{H}$  NMR (500 MHz,  $\text{CDCl}_3$ )  $\delta$  7.96 – 7.91 (m, 2H), 7.36 (s, 1H), 6.97 – 6.91 (m, 2H), 1.87 – 1.79 (m, 1H), 0.93 – 0.86 (m, 2H), 0.83 – 0.76 (m, 2H).;  $^{13}\text{C}$  NMR (125 MHz,  $\text{CDCl}_3$ )  $\delta$  161.39, 161.09, 144.00, 132.64, 127.91, 120.62, 114.04, 55.34, 7.14, 6.42.; IR(neat): 3007, 2961, 1615, 1501, 1253, 1172, 1028, 746.; MS( $\text{ES}^+$ ) Calculated for  $[\text{C}_{13}\text{H}_{14}\text{NO}_2]^+$ : 216.10; Found: 216.11.

#### 2-(4-(2-(4-methoxyphenyl)oxazol-4-yl)butyl)isoindoline-1,3-dione (3n)

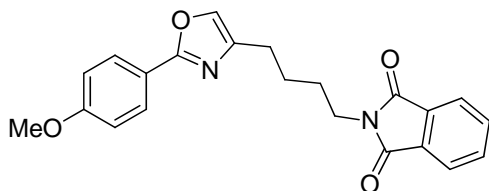

This compound was prepared in 82 % yield according to the general procedure C.  $^1\text{H}$  NMR (500 MHz,  $\text{CDCl}_3$ )  $\delta$  7.95 – 7.90 (m, 2H), 7.83 (td,  $J = 5.3, 2.1$  Hz, 2H), 7.72 – 7.67 (m, 2H), 7.38 (d,  $J = 0.9$  Hz, 1H), 6.96 – 6.91 (m, 2H), 3.85 (s, 3H), 3.73 (t,  $J = 6.5$  Hz, 2H), 2.61 (t,  $J = 7.1$  Hz, 2H), 1.82 – 1.70 (m, 4H).;  $^{13}\text{C}$  NMR (126 MHz,  $\text{CDCl}_3$ )  $\delta$  168.42, 161.51, 161.13, 141.46, 133.85, 133.49, 132.13, 127.92, 123.17, 120.55, 114.07, 55.35, 37.70, 28.12, 25.92, 25.68.; IR(neat): 2940, 2862, 1770, 1710,

1614, 1500, 1397, 1172, 1032, 838, 720.; MS(ES<sup>+</sup>) Calculated for [C<sub>22</sub>H<sub>20</sub>N<sub>2</sub>NaO<sub>4</sub>]<sup>+</sup>: 399.13; Found: 399.14.

### 2-(4-methoxyphenyl)-4-(4-((triisopropylsilyloxy)butyl)oxazole (3o)

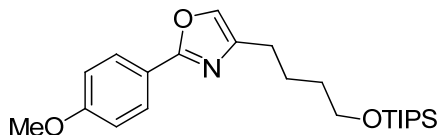

This compound was prepared in 71 % yield according to the general procedure C. <sup>1</sup>H NMR (500 MHz, CDCl<sub>3</sub>) δ 7.95 (d, *J* = 8.8 Hz, 2H), 7.37 (s, 1H), 6.94 (d, *J* = 8.8 Hz, 2H), 3.85 (s, 3H), 3.77 – 3.68 (m, 2H), 2.60 (t, *J* = 7.5 Hz, 2H), 1.80 – 1.71 (m, 2H), 1.68 – 1.60 (m, 2H), 1.08 – 1.03 (m, 21H).; <sup>13</sup>C NMR (125 MHz, CDCl<sub>3</sub>) δ 161.40, 161.11, 142.15, 133.32, 127.89, 120.62, 114.06, 63.14, 55.32, 32.57, 26.32, 24.66, 18.03, 12.00.; IR(neat): 2943, 2893, 2866, 1615, 1589, 1501, 1463, 1442, 1304, 1254, 1172, 1069, 1032, 883.; MS(ES<sup>+</sup>) Calculated for [C<sub>23</sub>H<sub>37</sub>NNaO<sub>3</sub>Si]<sup>+</sup>: 426.24; Found: 426.26.

### 4-(4-chlorobutyl)-2-(2-methylprop-1-en-1-yl)oxazole (3p)

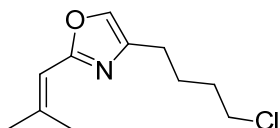

This compound was prepared in 71 % yield according to the general procedure C. <sup>1</sup>H NMR (500 MHz, CDCl<sub>3</sub>) δ 7.28 (s, 1H), 6.07 (dt, *J* = 2.5, 1.2 Hz, 1H), 3.56 (t, *J* = 6.4 Hz, 2H), 2.57 – 2.53 (m, 2H), 2.18 (s, 3H), 1.94 (s, 3H), 1.88 – 1.75 (m, 4H).; <sup>13</sup>C NMR (125 MHz, CDCl<sub>3</sub>) δ 161.49, 145.39, 140.72, 132.36, 111.88, 44.79, 32.06, 27.15, 25.66, 25.56, 20.35.; IR(neat): 2937, 1723, 1659, 1592, 1545, 1522, 1447, 1377, 1278, 1103, 840, 799, 744.; MS(ES<sup>+</sup>) Calculated for [C<sub>11</sub>H<sub>17</sub>ClNO]<sup>+</sup>: 214.10; Found: 214.10.

### 4-(2-(p-tolyl)oxazol-4-yl)butyl acetate (3q)

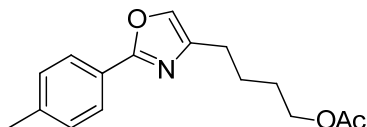

This compound was prepared in 73 % yield according to the general procedure D. <sup>1</sup>H NMR (500 MHz, CDCl<sub>3</sub>) δ 7.90 (d, *J* = 8.2 Hz, 2H), 7.40 (d, *J* = 0.9 Hz, 1H), 7.26 – 7.23 (m, 2H), 4.10 (t, *J* = 6.2 Hz, 2H), 2.61 (t, *J* = 7.2 Hz, 2H), 2.39 (s, 3H), 2.05 (s,

3H), 1.83 – 1.68 (m, 4H).;  $^{13}\text{C}$  NMR (126 MHz,  $\text{CDCl}_3$ )  $\delta$  171.17, 161.72, 141.69, 140.40, 133.66, 129.40, 126.24, 124.95, 64.25, 28.21, 26.04, 24.90, 21.48, 21.00.; IR(neat): 2966, 2929, 1722, 1473, 1431, 1409, 1118, 1071, 1050, 935, 827, 729.; MS( $\text{ES}^+$ ) Calculated for  $[\text{C}_{16}\text{H}_{19}\text{NNaO}_3]^+$ : 296.13; Found: 296.14.

### 2-(4-methoxyphenyl)-4-phenethylloxazole (3r)

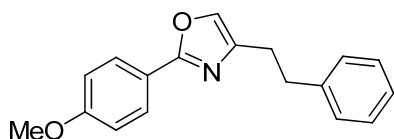

This compound was prepared in 67 % yield according to the general procedure A.  $^1\text{H}$  NMR (500 MHz,  $\text{CDCl}_3$ )  $\delta$  7.98 (d,  $J = 8.8$  Hz, 2H), 7.34 – 7.17 (m, 6H), 6.97 (d,  $J = 8.8$  Hz, 2H), 3.86 (s, 3H), 3.06 – 2.97 (m, 2H), 2.94 – 2.86 (m, 2H).;  $^{13}\text{C}$  NMR (125 MHz,  $\text{CDCl}_3$ )  $\delta$  161.49, 161.19, 141.37, 141.28, 133.65, 128.43, 128.36, 127.94, 126.00, 120.55, 114.12, 55.36, 34.64, 28.30.; IR(neat): 3027, 2933, 2838, 1614, 1500, 1254, 1172, 1029, 837, 746.; MS( $\text{ES}^+$ ) Calculated for  $[\text{C}_{18}\text{H}_{17}\text{NNaO}_2]^+$ : 302.12; Found: 302.13.

### 2,4-diphenyloxazole (3s)

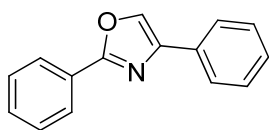

This compound was prepared in 70 % yield according to the general procedure A.  $^1\text{H}$  NMR (600 MHz,  $\text{cdcl}_3$ )  $\delta$  8.14 (d,  $J = 8.0$  Hz, 2H), 7.97 (s, 1H), 7.84 (d,  $J = 8.0$  Hz, 2H), 7.51 – 7.46 (m, 3H), 7.44 (t,  $J = 7.6$  Hz, 2H), 7.34 (dd,  $J = 10.8, 3.9$  Hz, 1H).;  $^{13}\text{C}$  NMR (151 MHz,  $\text{cdcl}_3$ )  $\delta$  161.91, 141.99, 133.40, 131.11, 130.37, 128.73, 128.72, 128.09, 127.49, 126.49, 125.62.; IR(neat): 3156, 3066, 3043, 2925, 1727, 1657, 1554, 1488, 1448, 1340, 1124, 1070, 930, 783.; MS( $\text{ES}^+$ ) Calculated for  $[\text{C}_{1521}\text{NO}]^+$ : 222.09; Found: 222.10.

### 2,4-di-p-tolyloxazole (3t)

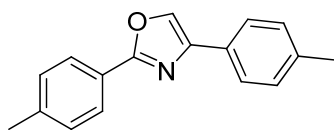

This compound was prepared in 63 % yield according to the general procedure A.  $^1\text{H}$  NMR (500 MHz,  $\text{CDCl}_3$ )  $\delta$  8.01 (d,  $J = 8.2$  Hz, 2H), 7.71 (d,  $J = 8.1$  Hz, 2H), 7.28 (d,



$J = 7.9$  Hz, 2H), 7.24 (d,  $J = 7.9$  Hz, 2H), 2.42 (s, 3H), 2.39 (s, 3H).;  $^{13}\text{C}$  NMR (126 MHz,  $\text{CDCl}_3$ )  $\delta$  161.94, 141.88, 140.58, 137.85, 132.69, 129.43, 129.39, 128.37, 126.45, 125.51, 124.88, 21.54, 21.32.; IR(neat): 3135, 3029, 2919, 1649, 1505, 1444, 1413, 1108, 1076, 932, 735.; MS( $\text{ES}^+$ ) Calculated for  $[\text{C}_{17}\text{H}_{16}\text{NO}]^+$ : 250.12; Found: 250.14.

### 2,4-bis(4-methoxyphenyl)oxazole (3u)

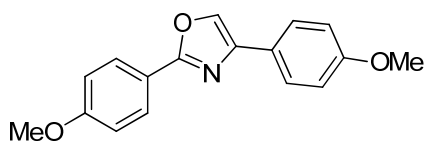

This compound was prepared in 53 % yield according to the general procedure A.  $^1\text{H}$  NMR (500 MHz,  $\text{CDCl}_3$ )  $\delta$  8.05 (d,  $J = 8.9$  Hz, 2H), 7.83 (s, 1H), 7.74 (d,  $J = 8.8$  Hz, 2H), 6.97 (dd,  $J = 12.0, 8.8$  Hz, 5H), 3.87 (s, 3H), 3.85 (s, 3H).;  $^{13}\text{C}$  NMR (126 MHz,  $\text{CDCl}_3$ )  $\delta$  161.85, 161.30, 159.48, 141.55, 131.86, 128.12, 126.90, 124.00, 120.44, 114.13, 114.07, 55.37, 55.32.; IR(neat): 3042, 2964, 2841, 1648, 1611, 1505, 1254, 1171, 1109, 1027, 836, 746.; MS( $\text{ES}^+$ ) Calculated for  $[\text{C}_{17}\text{H}_{16}\text{NO}_3]^+$ : 282.11; Found: 282.13.

### DFT studies.

**Calculation details.** To get more information about the possible tricoordinated gold complex, density functional theory (DFT)<sup>2</sup> studies have been performed with GAUSSIAN09<sup>3</sup> program at PBE1PBE<sup>4</sup>/6-311+G\*\*/SDD<sup>5</sup> level. Our test calculation shows that this method can reproduce the structure of Mor-DalPhosAuCl in good quality compared with the X-ray data.

#### 1. The tricoordinated gold complex.

To understand the influence of the coordination of the N atom to the gold center, model **D** is used as a benchmark to compare with, it is a "non-coordinated model" in which the N-Au distance is fixed to 2.930Å, the same as that in the Mor-DalPhosAuCl crystal. The tricoordinated gold complex **E** is fully optimized.

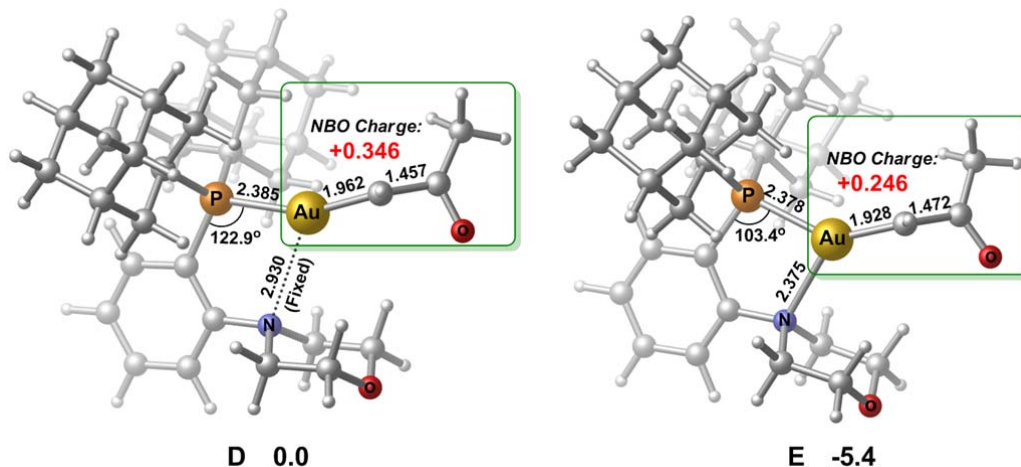

**Figure S1.** The partially optimized structure **D** with fixed Au-N distance of 2.930 Å and the fully optimized structure **E**. The selected bond lengths are in angstroms, bond angles are in degrees. The relative energies  $\Delta E$  are in kcal/mol. Calculated at PBE1PBE/6-311+G\*\* level.

The results in Figure S1 show that **E** is 5.4 kcal/mol stable than **D**, indicating the coordination of the N atom is favorable in energy. The NBO charge of the metal carbene moiety in **D** is +0.346, whereas in **E** the charge decreased to +0.246. Apparently, the coordination of the N atom donates more electrons to the metal carbene moiety. Consequently, the Au-C bond becomes stronger, its bond length decrease from 1.962 to 1.928 Å. The P-Au bond length in **E** is slightly shorter than in **D**, this may results from a better coordination angle of the lone pair of the P atom.

## 2. The test calculation.

The optimized structure (Figure S2) shows that PBE1PBE method can produce reliable results. The difference between the calculated and experimental (from X-ray data) bond length of C-P, P-Au, and Au-Cl are 0.011, 0.035 and 0.009 Å, respectively. For the N-Au distance, the difference is 0.090 Å, this result is not bad for a long distance weak interaction. The calculated and experimental C-P-Au angle are also quite close.

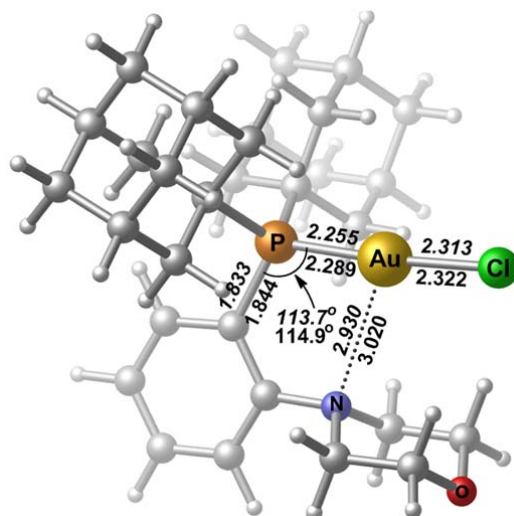

**Figure S2.** The optimized structure of Mor-DalPhosAuCl. The bond lengths (in angstroms) and bond angle (in degrees) in italic are taken from the X-ray data. Calculated at PBE1PBE/6-311+G\*\* level.

### 3. Calculated total energies and geometry coordinates.

#### D

SCF Done: E(RPBE1PBE) = -1965.79170067 A.U.

Au,-0.18715482 93,-1.4649363403,-0.4209405787  
P,0.7296738659,0.6694921066,0.117550828 4  
O,2.5816728697,-4.6779721531,-0.1971512543  
N,2.6501657999,-1.8651976 757,0.1908619413  
C,2.5303750643,0.6028591718,0.4789290481  
C,3.26027058 61,-0.5977118363,0.4851174586  
C,4.6270502956,-0.5653642547,0.773131903  
C,5.2838142804,0.6241701494,1.0416780269  
C,4.5726386117,1.8165033166, 1.0243914677  
C,3.2148992619,1.7977731469,0.7487012736  
C,2.687319435,-2 .8016153148,1.3221712861  
C,2.0008264218,-4.1022795309,0.9479166568  
C,2 .4923995855,-3.8058530271,-1.2963857775  
C,3.1991529762,-2.4924266816,- 1.0188431569  
C,-0.1080427139,1.2494045703,1.7056582878  
C,0.0353505679, 0.0894575325,2.7151837266  
C,-0.7079915944,0.4208538751,4.0156610997  
C, -2.1921936841,0.6395361871,3.7096873049

C,-2.3426895096,1.805361958,2.7303179277  
C,-1.6042201986,1.4852439749,1.424775816  
C,0.4880253999,2.5139335548,2.3502630134  
C,-0.2693050929,2.848206807,3.6453278803  
C,-0.1187862284,1.6904032654,4.6339240339  
C,-1.7511971634,3.0770062759,3.342277203  
C,0.499422011,1.7908230057,-1.3902189045  
C,1.5732291228,1.3713493346,-2.4164738554  
C,1.3957621022,2.1609833795,-3.7199570825  
C,1.5325690386,3.6569761414,-3.4260894388  
C,0.4485713887,4.0832106434,-2.433000308  
C,0.6149547834,3.3018355032,-1.1201066074  
C,-0.8876848758,1.5111502683,-2.0118001765  
C,-1.0594503986,2.3044878709,-3.3131962165  
C,0.0146376569,1.8772030625,-4.3143548138  
C,-0.9336154689,3.8012852642,-3.0243234097  
H,5.1870357277,-1.4947654435,0.7816105913  
H,6.3463873244,0.6193302164,1.2598882829  
H,5.0696886975,2.7589406409,1.2266447974  
H,2.678551394,2.7368746302,0.7432649195  
H,2.1859635076,-2.3406442017,2.1778910096  
H,3.7253057233,-3.0215562168,1.6139241716  
H,2.1054967469,-4.8276059783,1.7569402498  
H,0.9265602033,-3.9277979215,0.7737278566  
H,1.4334925424,-3.6169324978,-1.5407279549  
H,2.9593014363,-4.3108390689,-2.1441641664  
H,4.2752130579,-2.6909708874,-0.9027304626  
H,3.071824516,-1.8053269846,-1.8602191577  
H,-0.3729246412,-0.8355056729,2.2847991664  
H,1.0971427169,-0.088917927,2.9266022319  
H,-0.5899501702,-0.4195862161,4.7084753687  
H,-2.6305016107,-0.2726569153,3.2840709303  
H,-2.7392668325,0.8519001056,4.6349115776  
H,-3.4021041291,1.962679118,2.5000228624  
H,-2.0444903424,0.5977660797,0.951710404  
H,-1.7304882089,2.3221433211,0.729411209  
H,1.5416289636,2.3498999879,2.5943725293  
H,0.4332204707,3.3644900958,1.6638078603  
H,0.1669511875,3.7577586186,4.0718620862  
H,0.9383928358,1.5370719272,4.8815673995  
H,-0.6351224121,1.9252842755,5.5714824336  
H,-2.2867183696,3.3376734513,4.2620184847  
H,-1.8746036381,3.9212062788,2.6528091065  
H,2.5760068075,1.5484953608,-2.0143246246

H,1.49008156 14,0.2945907517,-2.6206173094  
H,2.1758034969,1.8487574841,-4.422711904 4  
H,2.5276464598,3.8736416289,-3.0187124096  
H,1.4369712018,4.231812389 ,-4.3539397199  
H,0.547701258,5.1514127491,-2.2120212167  
H,1.5879085003 ,3.5494965644,-0.6861929533  
H,-0.1555229578,3.6209776578,-0.4100128418  
H,-0.9877783241,0.439362091,-2.2224517102  
H,-1.6867883138,1.774698374 1,-1.3125934059  
H,-2.0535346516,2.087756464,-3.7195781756  
H,-0.1087207 641,2.4231654039,-5.2563497011  
H,-0.0868435426,0.8102432785,-4.5488865 412  
H,-1.7183809345,4.1222842676,-2.328290813  
H,-1.0727715164,4.375377 3011,-3.9471856397  
C,-1.5241505135,-2.7978959742,-0.9540694367  
C,-2.25 94518893,-3.700921199,-0.0785749251  
H,-1.7492740349,-2.9800479222,-2.0 10847871  
O,-1.6268949873,-4.7415745207,-0.1403212621  
C,-3.4627476962,- 3.4276238986,0.735187909  
H,-3.268194235,-2.588128135,1.409679729  
H,-4. 288154711,-3.1303265225,0.0794802117  
H,-3.7410338281,-4.3149733601,1.3 046370507

## E

SCF Done: E(RPBE1PBE) = -1965.80027834 A.U.

Au,0.1490237058,-1.5259972377,-0.336715156  
P,0.7366637072,0.7283187388,0.1403571828  
O,2.6074636558,-4.7054219396,-0.0838372106  
N,2.4425993734,-1.8480521864,0.186990664  
C,2.5281131907,0.6362587394,0.4819642711  
C,3.163997965,-0.6118092845,0.4869134245  
C,4.5283000952,-0.6830575636,0.7761200773  
C,5.2648186733,0.4604926097,1.0394997608  
C,4.6459777237,1.703821043,1.0144521202  
C,3.2907820165,1.7838655261,0.7410595291  
C,2.4856352944,-2.7747933032,1.3549834305  
C,1.921242653,-4.1403376837,1.0074598692  
C,2.4586920582,-3.8994697599,-1.2266966276  
C,3.0493251035,-2.5207197616,-0.9987401078  
C,-0.0940671258,1.303995464,1.7286462705  
C,0.1102401473,0.1705684603,2.7573443463  
C,-0.609973748,0.5087161259,4.0690882928

C,-2.1066465883,0.674433681,3.7956162297  
C,-2.3181761715,1.8112730483,2.7928430527  
C,-1.6023504849,1.4828239612,1.4757469382  
C,0.4804117915,2.6004545053,2.330118574  
C,-0.2554189684,2.9381031794,3.6369382523  
C,-0.0440191677,1.8078318402,4.6456544562  
C,-1.7505008127,3.1135963967,3.362776911  
C,0.4796653881,1.8149005269,-1.3782626118  
C,1.5750421741,1.4330052139,-2.3959679656  
C,1.380921263,2.220999225,-3.6981786551  
C,1.4669125183,3.720430007,-3.3998158901  
C,0.3638980943,4.1068124452,-2.4123474744  
C,0.5481965013,3.3277203876,-1.1014373875  
C,-0.8938480569,1.4877861224,-2.0044409469  
C,-1.0811028987,2.279508869,-3.3052697479  
C,0.0140615329,1.8923650399,-4.3009899939  
C,-1.0052722749,3.7794343661,-3.0106230452  
H,5.0320913822,-1.6430408074,0.7940624558  
H,6.3237594604,0.3780647391,1.2590128372  
H,5.2149115683,2.6062270535,1.209172325  
H,2.8176909028,2.7574110547,0.7248108959  
H,1.9259600501,-2.3173361823,2.1747981222  
H,3.5245516633,-2.9016511771,1.6793683104  
H,2.0613570158,-4.8110735728,1.857406723  
H,0.8448400114,-4.0839588137,0.7887619187  
H,1.3973910957,-3.8330952116,-1.5080029265  
H,2.999581996,-4.3887558269,-2.0392100546  
H,4.1275346539,-2.6328736186,-0.8418308929  
H,2.8981378686,-1.8782810511,-1.8702410048  
H,-0.2859841453,-0.77325703,2.3584866293  
H,1.181663368,0.0280595846,2.9467574689  
H,-0.4497300914,-0.3129448625,4.7756349954  
H,-2.5272470588,-0.2612345306,3.4054461522  
H,-2.6367866154,0.893735493,4.7289018506  
H,-3.387152618,1.9310272514,2.5863420878  
H,-2.021825775,0.5706037088,1.0327092564  
H,-1.7714716834,2.2975702209,0.76394158  
H,1.5453259001,2.4732865842,2.5483853593  
H,0.3801691724,3.4346773169,1.6300844679  
H,0.1609318861,3.8707075262,4.0324450938  
H,1.0232935411,1.6918703057,4.8695416555  
H,-0.5436269062,2.0469690257,5.5910416202  
H,-2.2726035914,3.3782581128,4.2889182606  
H,-1.9144562067,3.9387076264,2.6589387171

H,2.5683783307,1.6420328118,-1.9860178635  
H,1.5289924564,0.3547822579,-2.6045108919  
H,2.1751422415,1.9359637984,-4.3965490408  
H,2.4521535643,3.9699428487,-2.9871045377  
H,1.3573014573,4.2934542367,-4.3271955772  
H,0.4250992579,5.1770963343,-2.1878045744  
H,1.5104400387,3.5999425551,-0.6556670593  
H,-0.237051602,3.6207674735,-0.3970272037  
H,-0.9582802092,0.4135280045,-2.2125084023  
H,-1.7037260192,1.7277093211,-1.3082907008  
H,-2.0643668667,2.0323662093,-3.720035264  
H,-0.1229253403,2.4367349289,-5.2418751859  
H,-0.0494775901,0.82337284,-4.5390507352  
H,-1.8031621267,4.0724353424,-2.3172166456  
H,-1.1593321728,4.3515133217,-3.9322259301  
C,-1.3159570571,-2.657744421,-0.8748487925  
C,-2.2058250113,-3.4400683836,-0.0007227697  
H,-1.5719967145,-2.7771923419,-1.9337875326  
O,-1.910960664,-4.6184846698,0.0189502515  
C,-3.3136497494,-2.819026893,0.7808158616  
H,-2.9045882793,-2.0904393706,1.4876479218  
H,-3.989524659,-2.2767008172,0.1115973524  
H,-3.8634477783,-3.5921450685,1.3188822428

### **Mor-DalPhosAuCl**

SCF Done: E(RPBE1PBE) = -2234.39856016 A.U.

Au,0.133879 2682,-1.4131533081,-0.4207077787  
Cl,-0.3773328792,-3.6244533717,-0.912 5513988  
P,0.4718010946,0.7952463059,0.0791343319  
O,3.9173046664,-3.734 6397448,-0.2326011066  
N,3.1018606553,-1.0264144074,-0.0161674506  
C,2.2 401748472,1.2927530986,0.2379775458  
C,3.3082003669,0.3762057736,0.1695 571768  
C,4.618641751,0.8527958293,0.2937494838  
C,4.898366071,2.1967248 067,0.4717488244  
C,3.8506116658,3.1061428085,0.5327165933  
C,2.54730291 9,2.6501911592,0.4207176917  
C,3.4840531878,-1.8127545314,1.1587020883  
C,3.2186963261,-3.2857093368,0.9090878353  
C,3.4673227691,-3.0303948845 ,-1.372113935  
C,3.7394630363,-1.543792193,-1.2295759314

C,-0.296133379 1,1.1474129099,1.7708177011  
C,0.2898148293,0.0898808084,2.731786123  
C, -0.3611483266,0.2019418467,4.1155174991  
C,-1.8694094525,-0.0270353806, 3.986021749  
C,-2.463071371,1.0334861959,3.0573131803  
C,-1.8177288436,0.9269585313,1.6705142009  
C,-0.0248782132,2.5347468479,2.3783884396  
C,- 0.6912382853,2.6465849087,3.7589750468  
C,-0.0995299743,1.5928066555,4.6967827792  
C,-2.2006337471,2.4287227134,3.6300498352  
C,-0.2593535751,1.8428457339,-1.330041782  
C,0.7659639914,1.8102224781,-2.4827873357  
C,0.2019797516,2.5219845783,-3.7186295858  
C,-0.1138143393,3.9780928193,-3.3643433335  
C,-1.1591158815,4.0138374592,-2.2469521951  
C,-0.6048607573,3.306033025,-1.001061555  
C,-1.5480858106,1.1458938455,-1.8248427697  
C,-2.1094338459,1.8598317497,-3.060025263  
C,-1.0744844841,1.8193213694,-4.1853316276  
C,-2.4361485156,3.3136280407,-2.7124793613  
H,5.4358816679,0.1402821297,0.2487498685  
H,5.926705853,2.5317357918,0.5631369643  
H,4.043373536,4.165055347,0.6695891792  
H,1.7466391538,3.374632193,0.4752766909  
H,2.8964695129,-1.4708571912,2.0163322372  
H,4.5524628255,-1.6795488335,1.404549881  
H,3.5775992163,-3.8775205694,1.7545651375  
H,2.1414210159,-3.4617346974,0.7810057597  
H,2.3948227259,-3.2113292756,-1.5239407762  
H,4.0183861638,-3.4274818462,-2.2278358376  
H,4.831968324,-1.3869268059,-1.2165864324  
H,3.332330675,-1.0080551749,-2.0931269504  
H,0.1229093295,-0.9138133089,2.3223757016  
H,1.374145378,0.2334497759,2.8187627884  
H,0.0746986609,-0.5627087356,4.7686675508  
H,-2.0663489585,-1.0296074528,3.5883623606  
H,-2.3447349088,0.027220215,4.9730856171  
H,-3.5419622205,0.8719277139,2.9525595062  
H,-2.0207326747,-0.057274242,1.2306642416  
H,-2.2657856152,1.6790925203,1.0116168384  
H,1.0525181503,2.6882930494,2.4943630606  
H,-0.4035742449,3.3301832818,1.728863081  
H,-0.4941470567,3.6489567672,4.1569630962  
H,0.9784981603,1.757047427,4.8169800733



H,-0.5512074621,1.6781666204,5.6926702167  
H,-2.6800141641,2.53135339 87,4.6111925712  
H,-2.6408148573,3.1938744749,2.9777496424  
H,1.69945023 44,2.2938483619,-2.1768432153  
H,1.0068152788,0.7674557694,-2.727592983 2  
H,0.9561604704,2.4894528299,-4.5133407156  
H,0.7993878562,4.496200125 7,-3.0451701213  
H,-0.4907599064,4.5078971762,-4.247563273  
H,-1.3815774 107,5.0544233746,-1.9826597717  
H,0.2773639482,3.8539674619,-0.65786381 08  
H,-1.3516037721,3.3488101438,-0.2011575573  
H,-1.3284962738,0.099829 4458,-2.066878327  
H,-2.304816138,1.1301205292,-1.0345664362  
H,-3.02006 90925,1.3380520141,-3.3749074587  
H,-1.469792982,2.3118646261,-5.082223 8359  
H,-0.8563556626,0.7799949129,-4.4578063583  
H,-3.1987184768,3.3537 140045,-1.9244724442  
H,-2.8514687748,3.8292335115,-3.5870074753

#### References:

1. Lundgren, R. J.; Peters, B.D.; Alsabeh, P. G.; Stradiotto, M. *Angew. Chem., Int. Ed.*, **2010**, *49*, 4071 - 4074
2. Hohenberg, P.; Kohn, W. *Phys. Rev.* **1964**, *136*, B864-B871; (b) Kohn, W.; Sham, L. J. *Phys. Rev.* **1965**, *140*, A1133-A1138.
3. *Gaussian 09, Revision A.02* Frisch, M. J. T., G. W.; Schlegel, H. B.; Scuseria, G. E.; Robb, M. A.; Cheeseman, J. R.; Scalmani, G.; Barone, V.; Mennucci, B.; Petersson, G. A.; Nakatsuji, H.; Caricato, M.; Li, X.; Hratchian, H. P.; Izmaylov, A. F.; Bloino, J.; Zheng, G.; Sonnenberg, J. L.; Hada, M.; Ehara, M.; Toyota, K.; Fukuda, R.; Hasegawa, J.; Ishida, M.; Nakajima, T.; Honda, Y.; Kitao, O.; Nakai, H.; Vreven, T.; Montgomery, A. Jr.; Peralta, J. E.; Ogliaro, F.; Bearpark, M.; Heyd, J. J.; Brothers, E.; Kudin, K. N.; Staroverov, V. N.; Kobayashi, R.; Normand, J.; Raghavachari, K.; Rendell, A.; Burant, J. C.; Iyengar, S. S.; Tomasi, J.; Cossi, M.; Rega, N.; Millam, J. M.; Klene, M.; Knox, J. E.; Cross, J. B.; Bakken, V.; Adamo, C.; Jaramillo, J.; Gomperts, R.; Stratmann, R. E.; Yazyev, O.; Austin, A. J.; Cammi, R.; Pomelli, C.; Ochterski, J. W.; Martin, R. L.; Morokuma, K.; Zakrzewski, V. G.; Voth, G. A.; Salvador, P.; Dannenberg, J. J.; Dapprich, S.; Daniels, A. D.; Farkas, O.; Foresman, J. B.; Ortiz, J. V.; Cioslowski J.; Fox, D. J. Gaussian, Inc.: Wallingford, CT, 2009.
4. (a) Perdew, J. P.; Burke, K.; Ernzerhof, M. *Phys. Rev. Lett.* **1996**, *77*, 3865-3868; (b) Perdew, J. P.; Burke, K.; Ernzerhof, M. *Phys. Rev. Lett.* **1997**, *78*, 1396-1396.; (c) Adamo, C.; Barone, V. *J. Chem. Phys.*, **1999**, *110*, 6158-6169.
5. Fuentealba, P.; Preuss, H.; Stoll, H.; Von Szentpály, L. *Chem. Phys. Lett.* **1982**, *89*, 418-422.

Title jkg-III-166C-1-H  
Solvent CDCl3  
Spectrometer Frequency 499.86

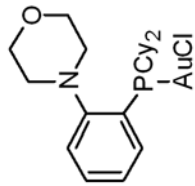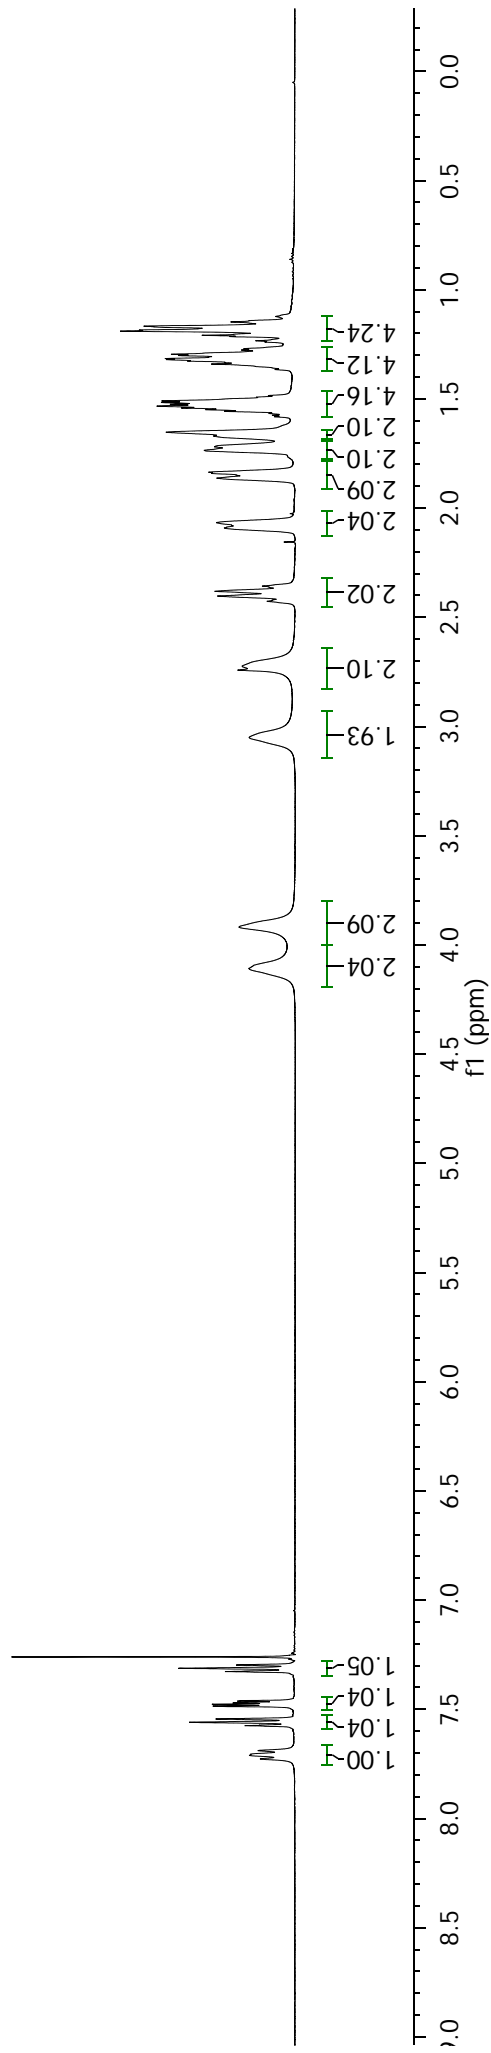

Title jkg-lll-166C-1-C  
Solvent CDCl<sub>3</sub>  
Spectrometer Frequency 125.70

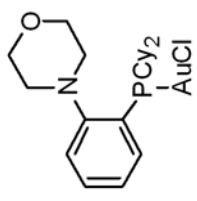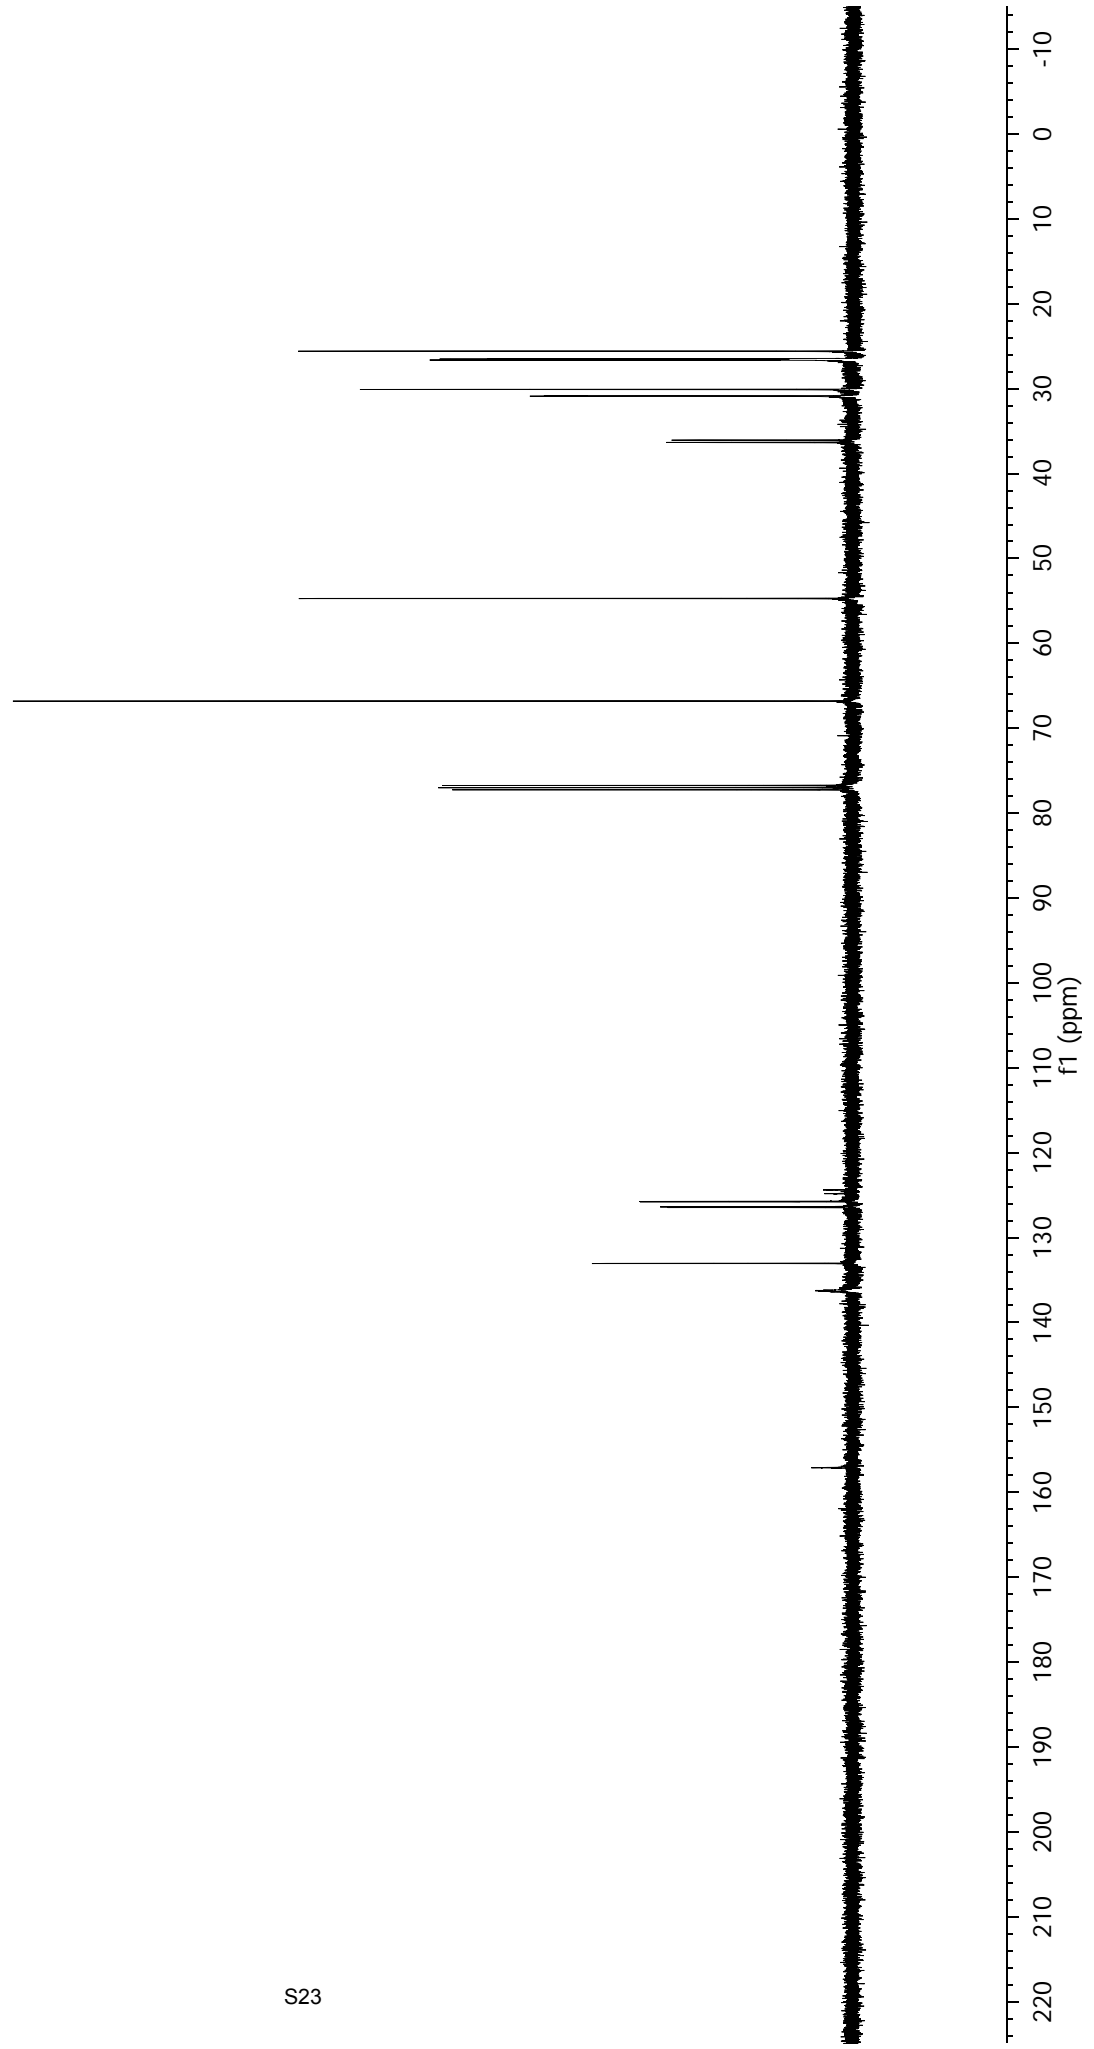

Title jkg-lll-164-B-H  
Solvent cdc13  
Spectrometer Frequency 599.63

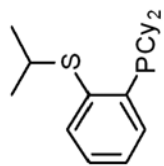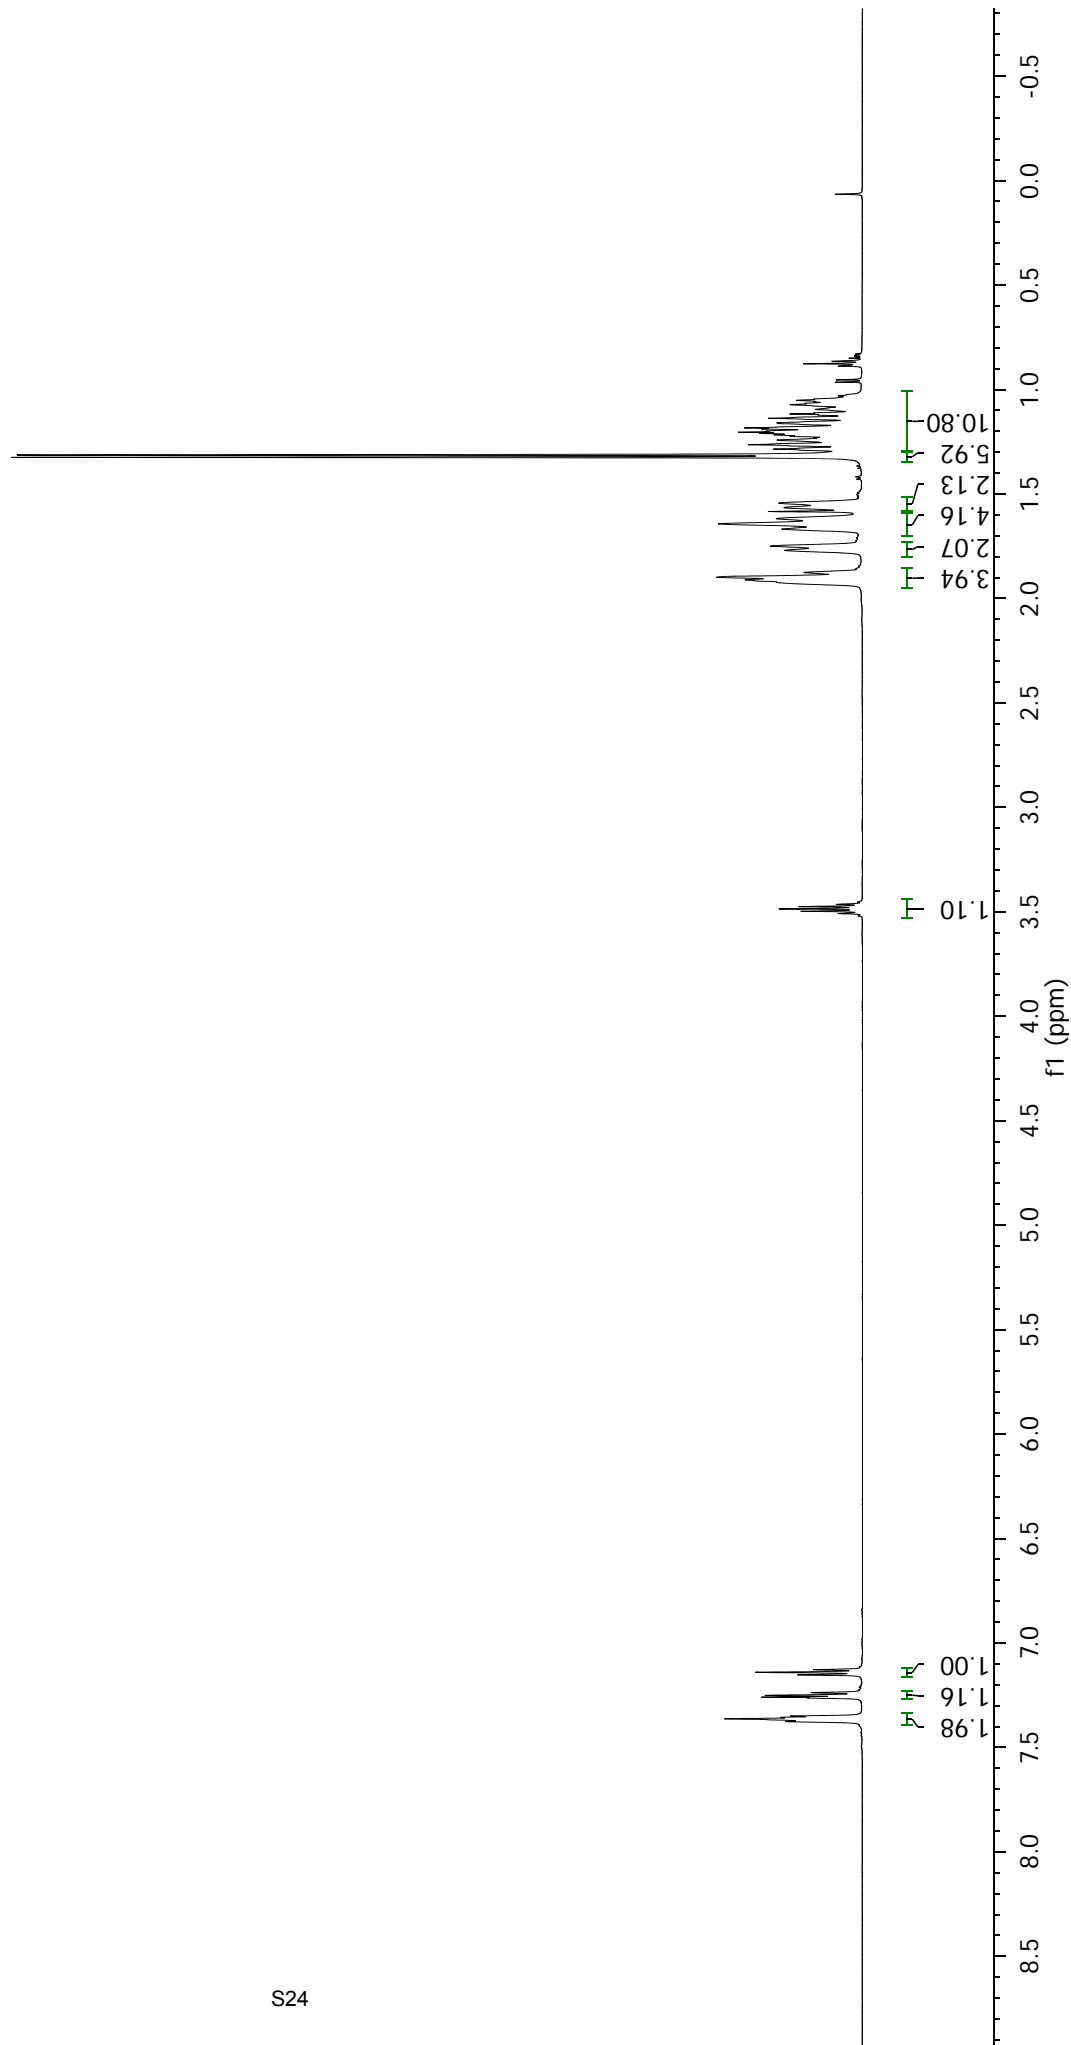

Title jkg-lll-164-B-C  
Solvent cdc13  
Spectrometer Frequency 150.79

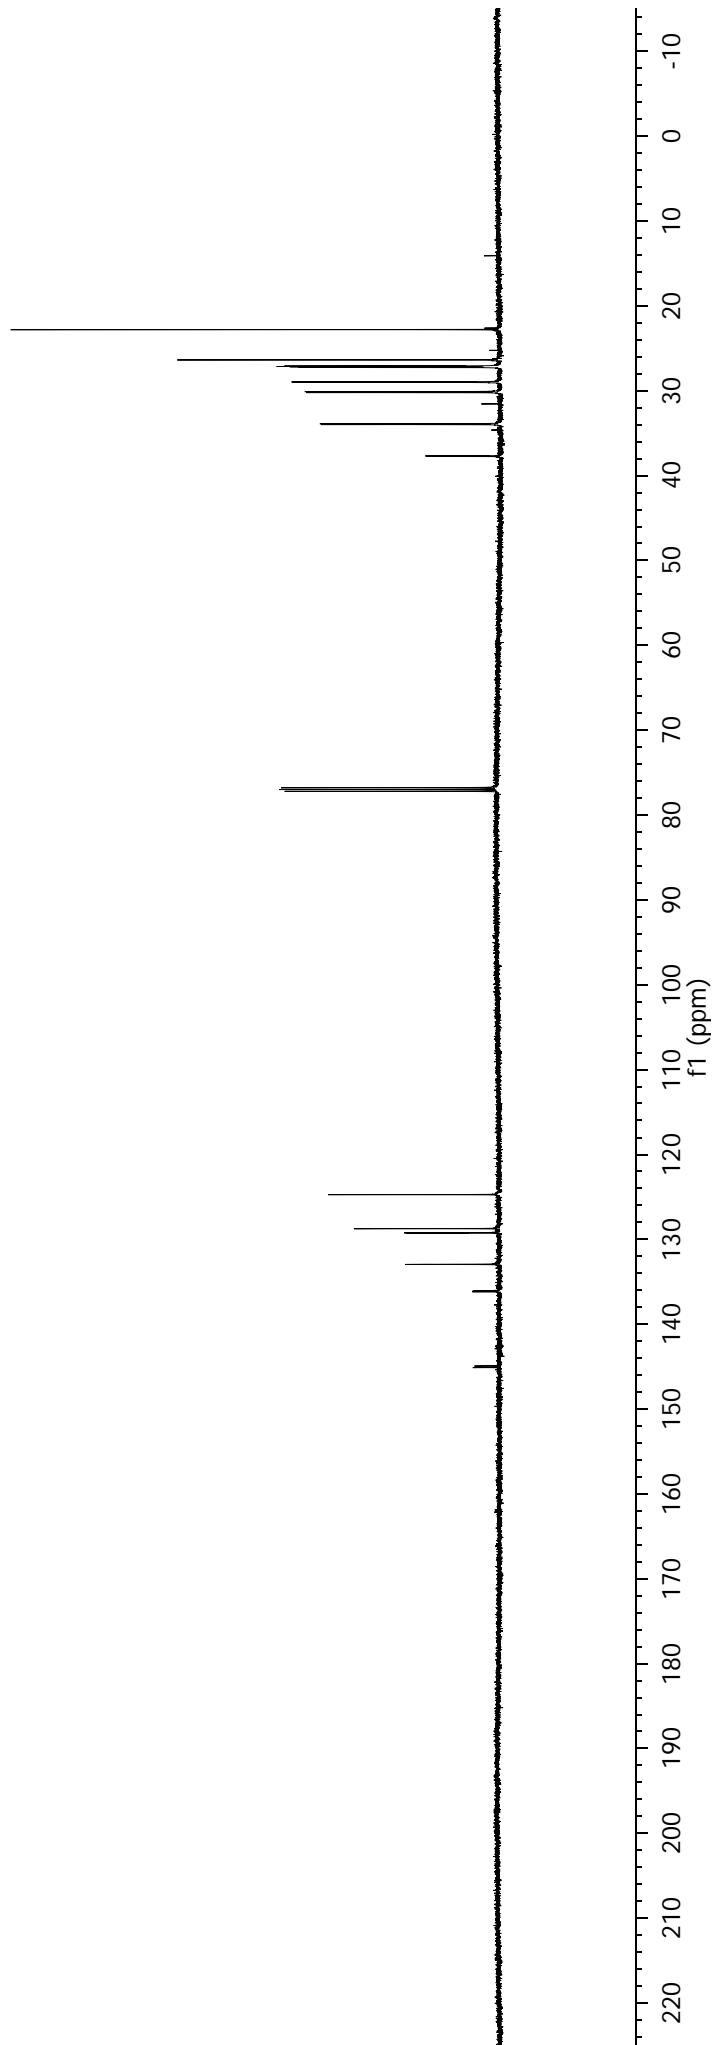

Title jkg-III-164-P  
Solvent cdc13  
Spectrometer Frequency 161.90

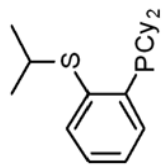

S26

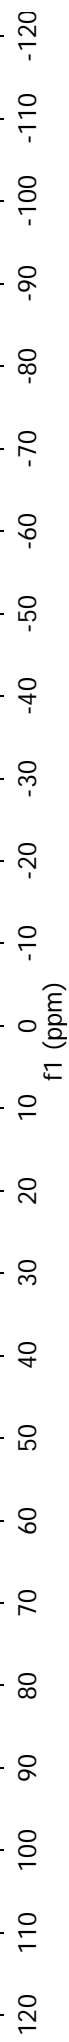

Title jkg-III-166-B-H  
Solvent CDCl3  
Spectrometer Frequency 499.86

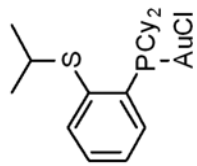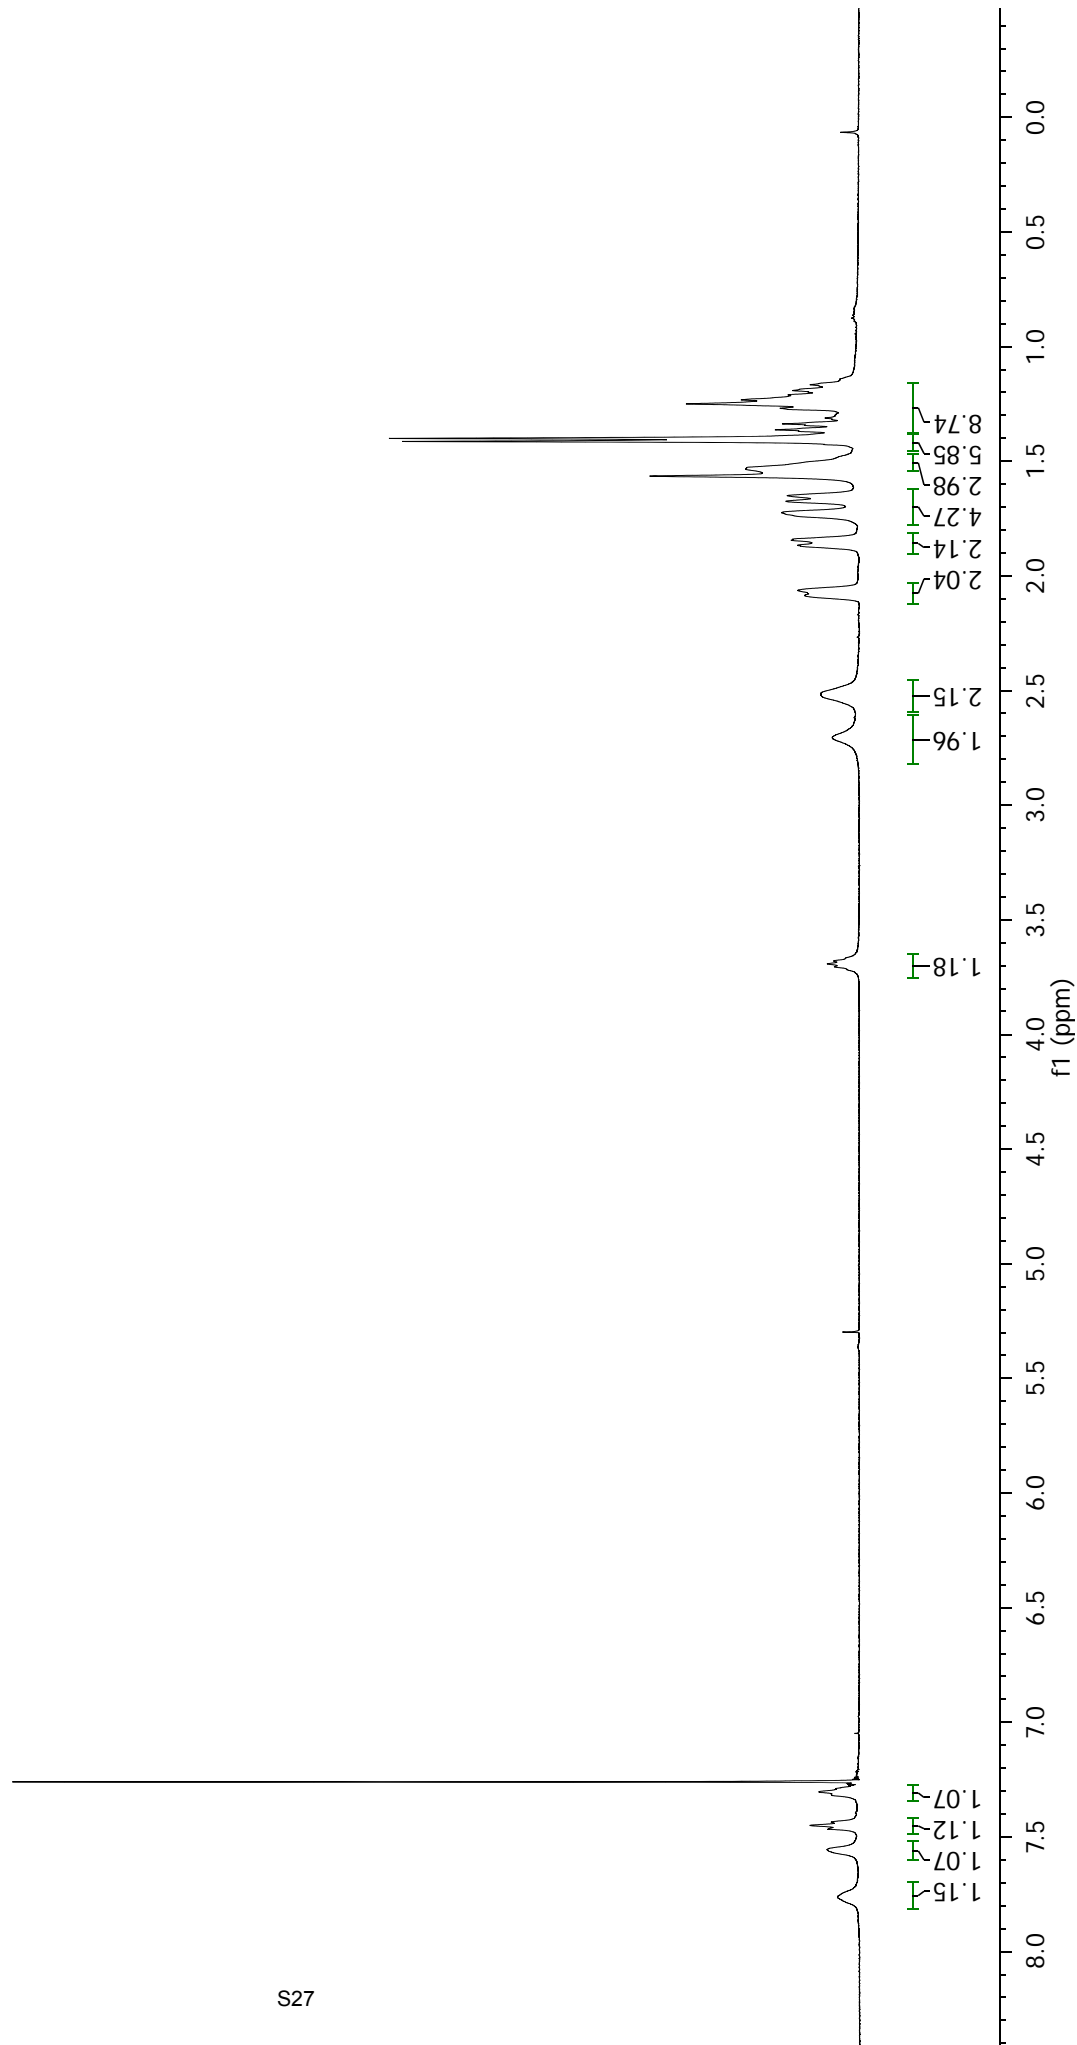

Title jkg-III-166B-C  
Solvent cdcl3  
Spectrometer Frequency 150.79

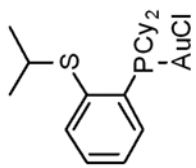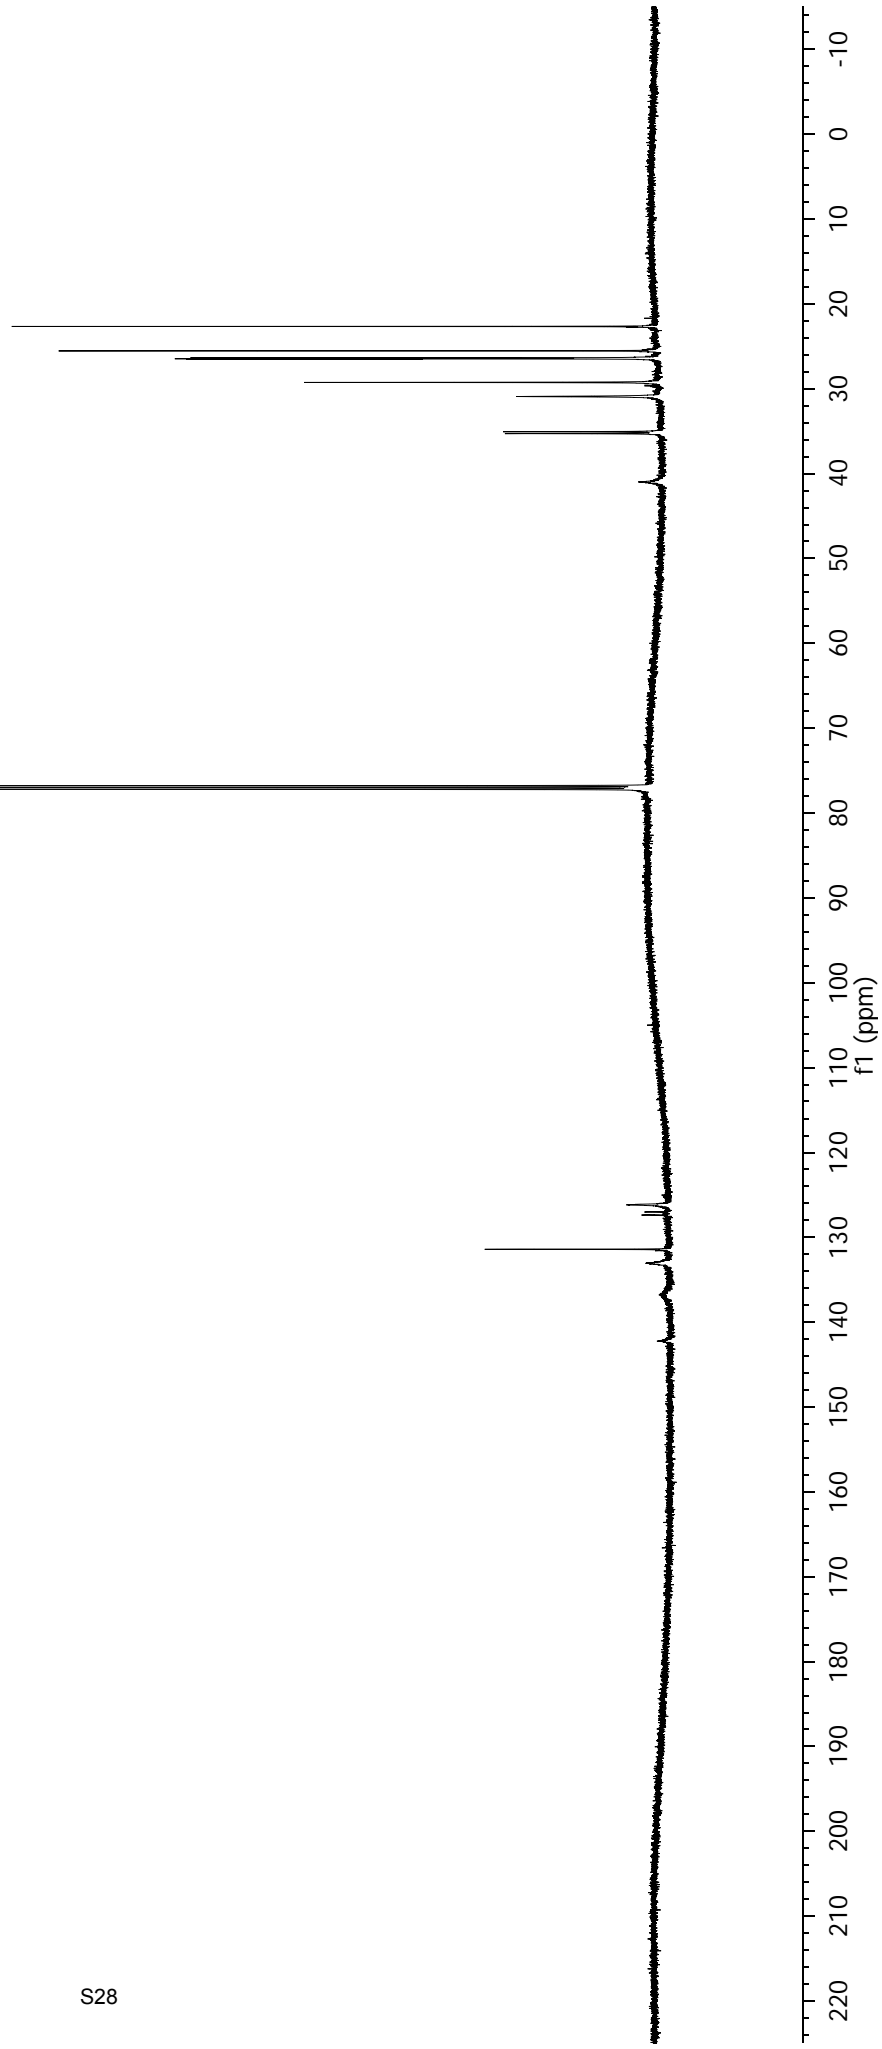



Title jkg-III-166B-P-1  
Solvent cdc13  
Spectrometer Frequency 161.90

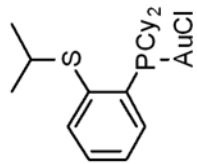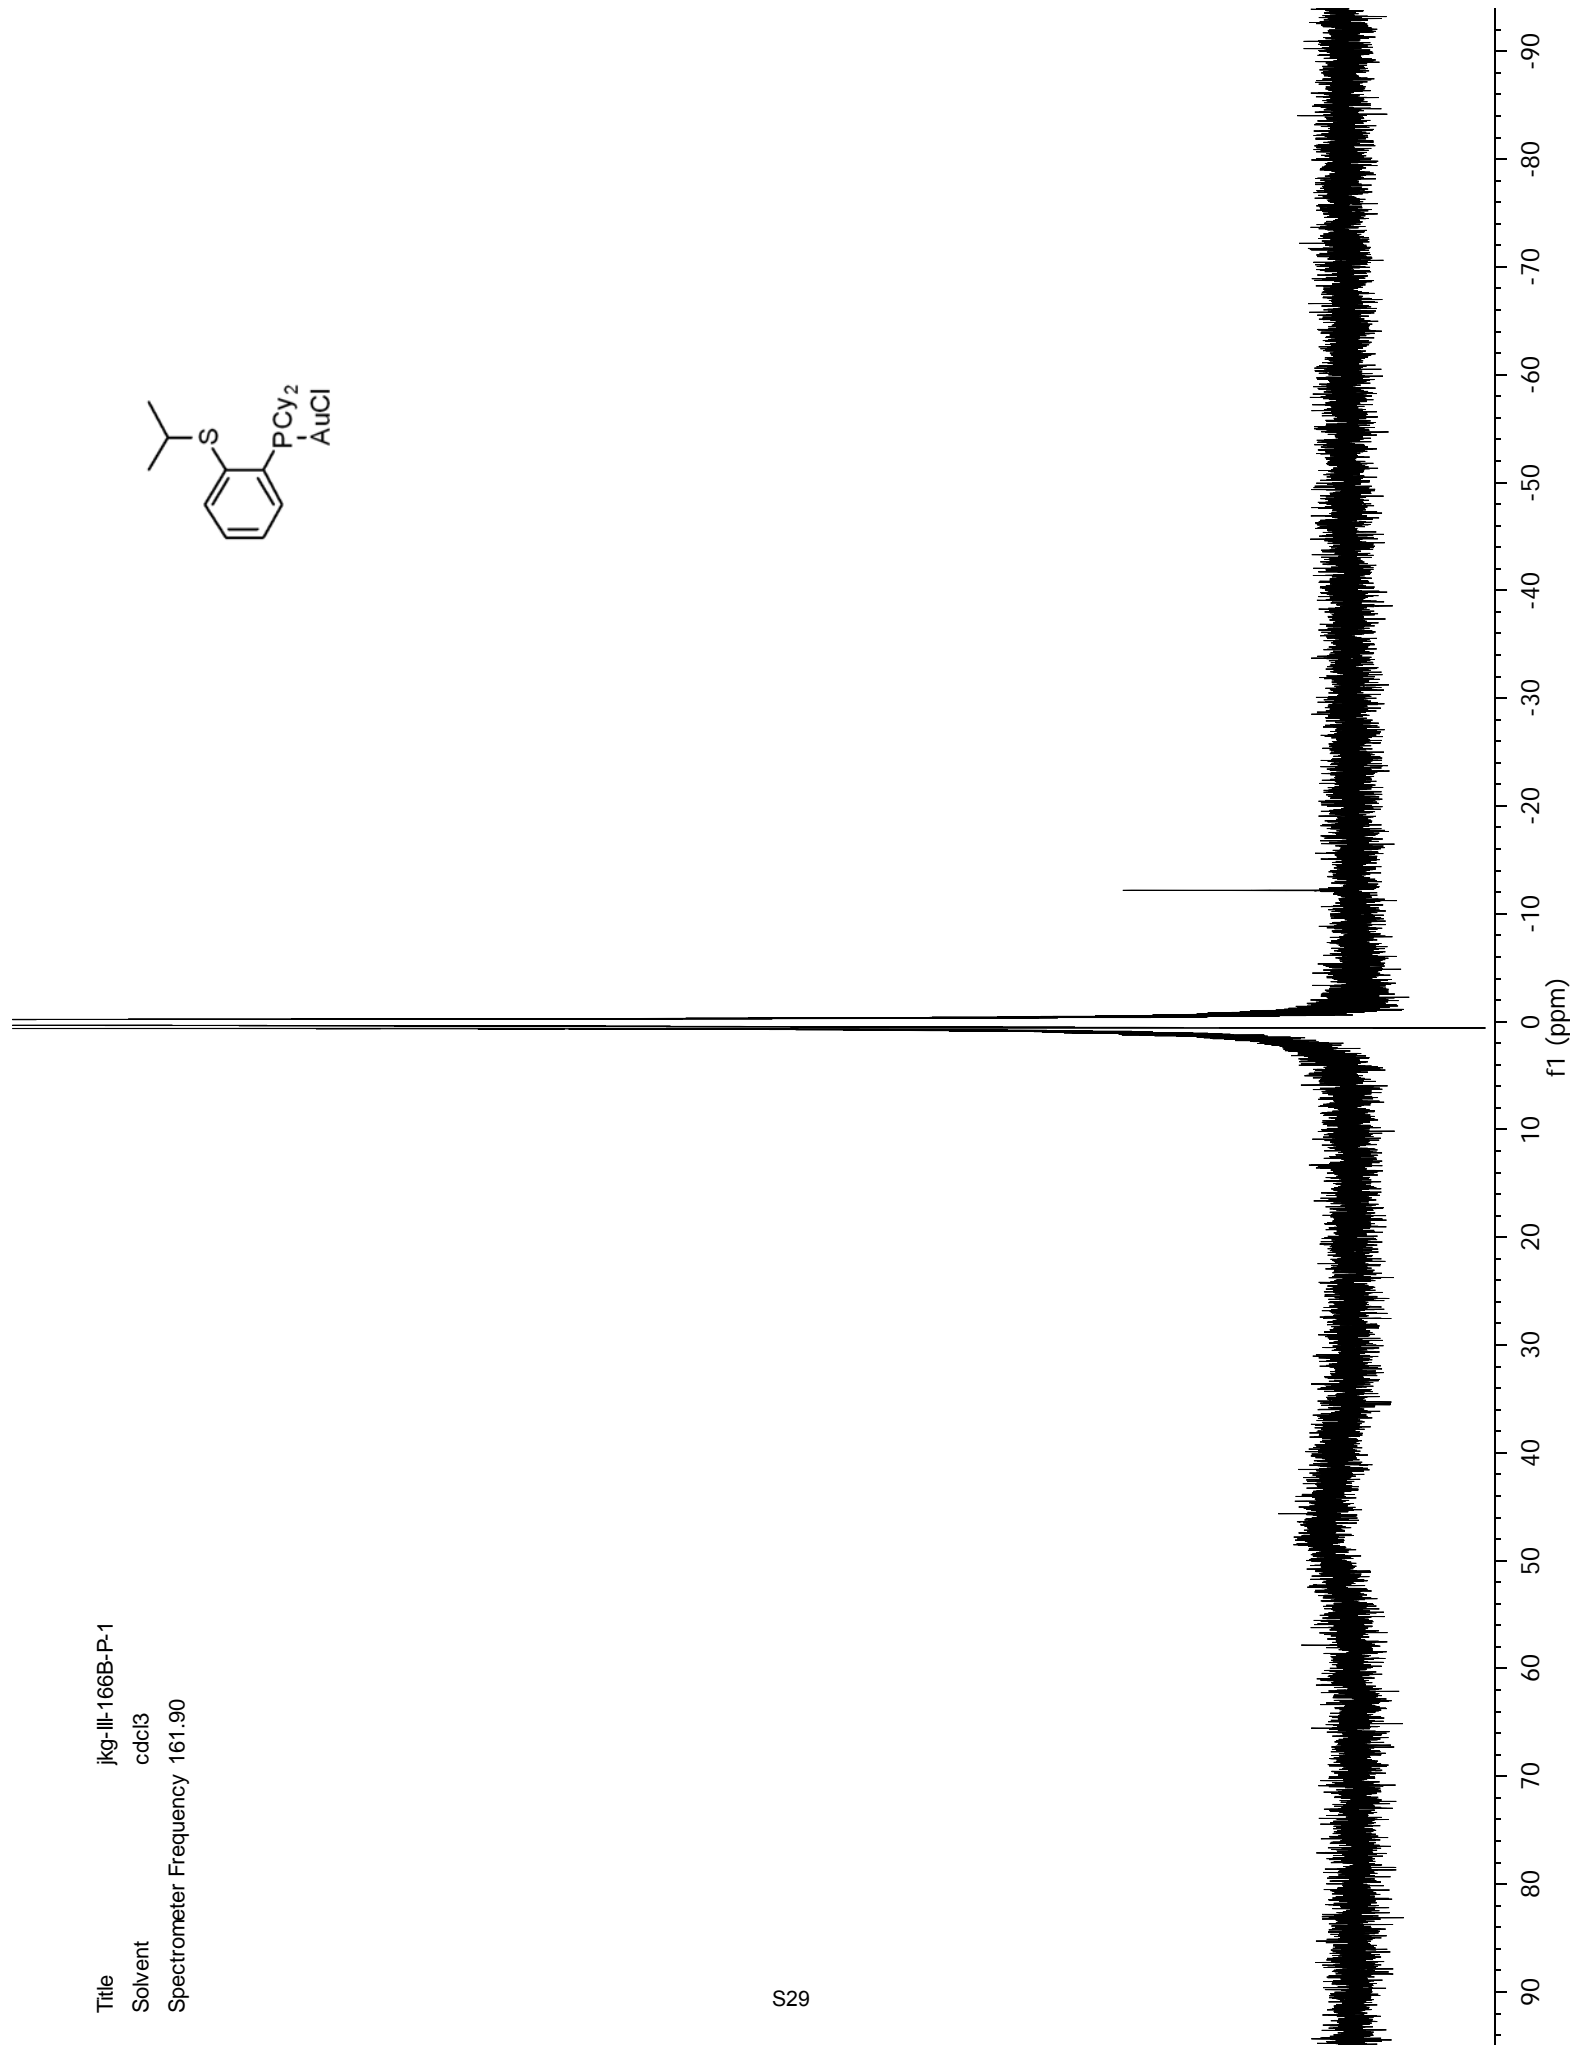

Title jkg-lll-118-H  
Solvent CDCl3  
Spectrometer Frequency 499.86

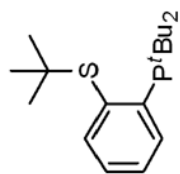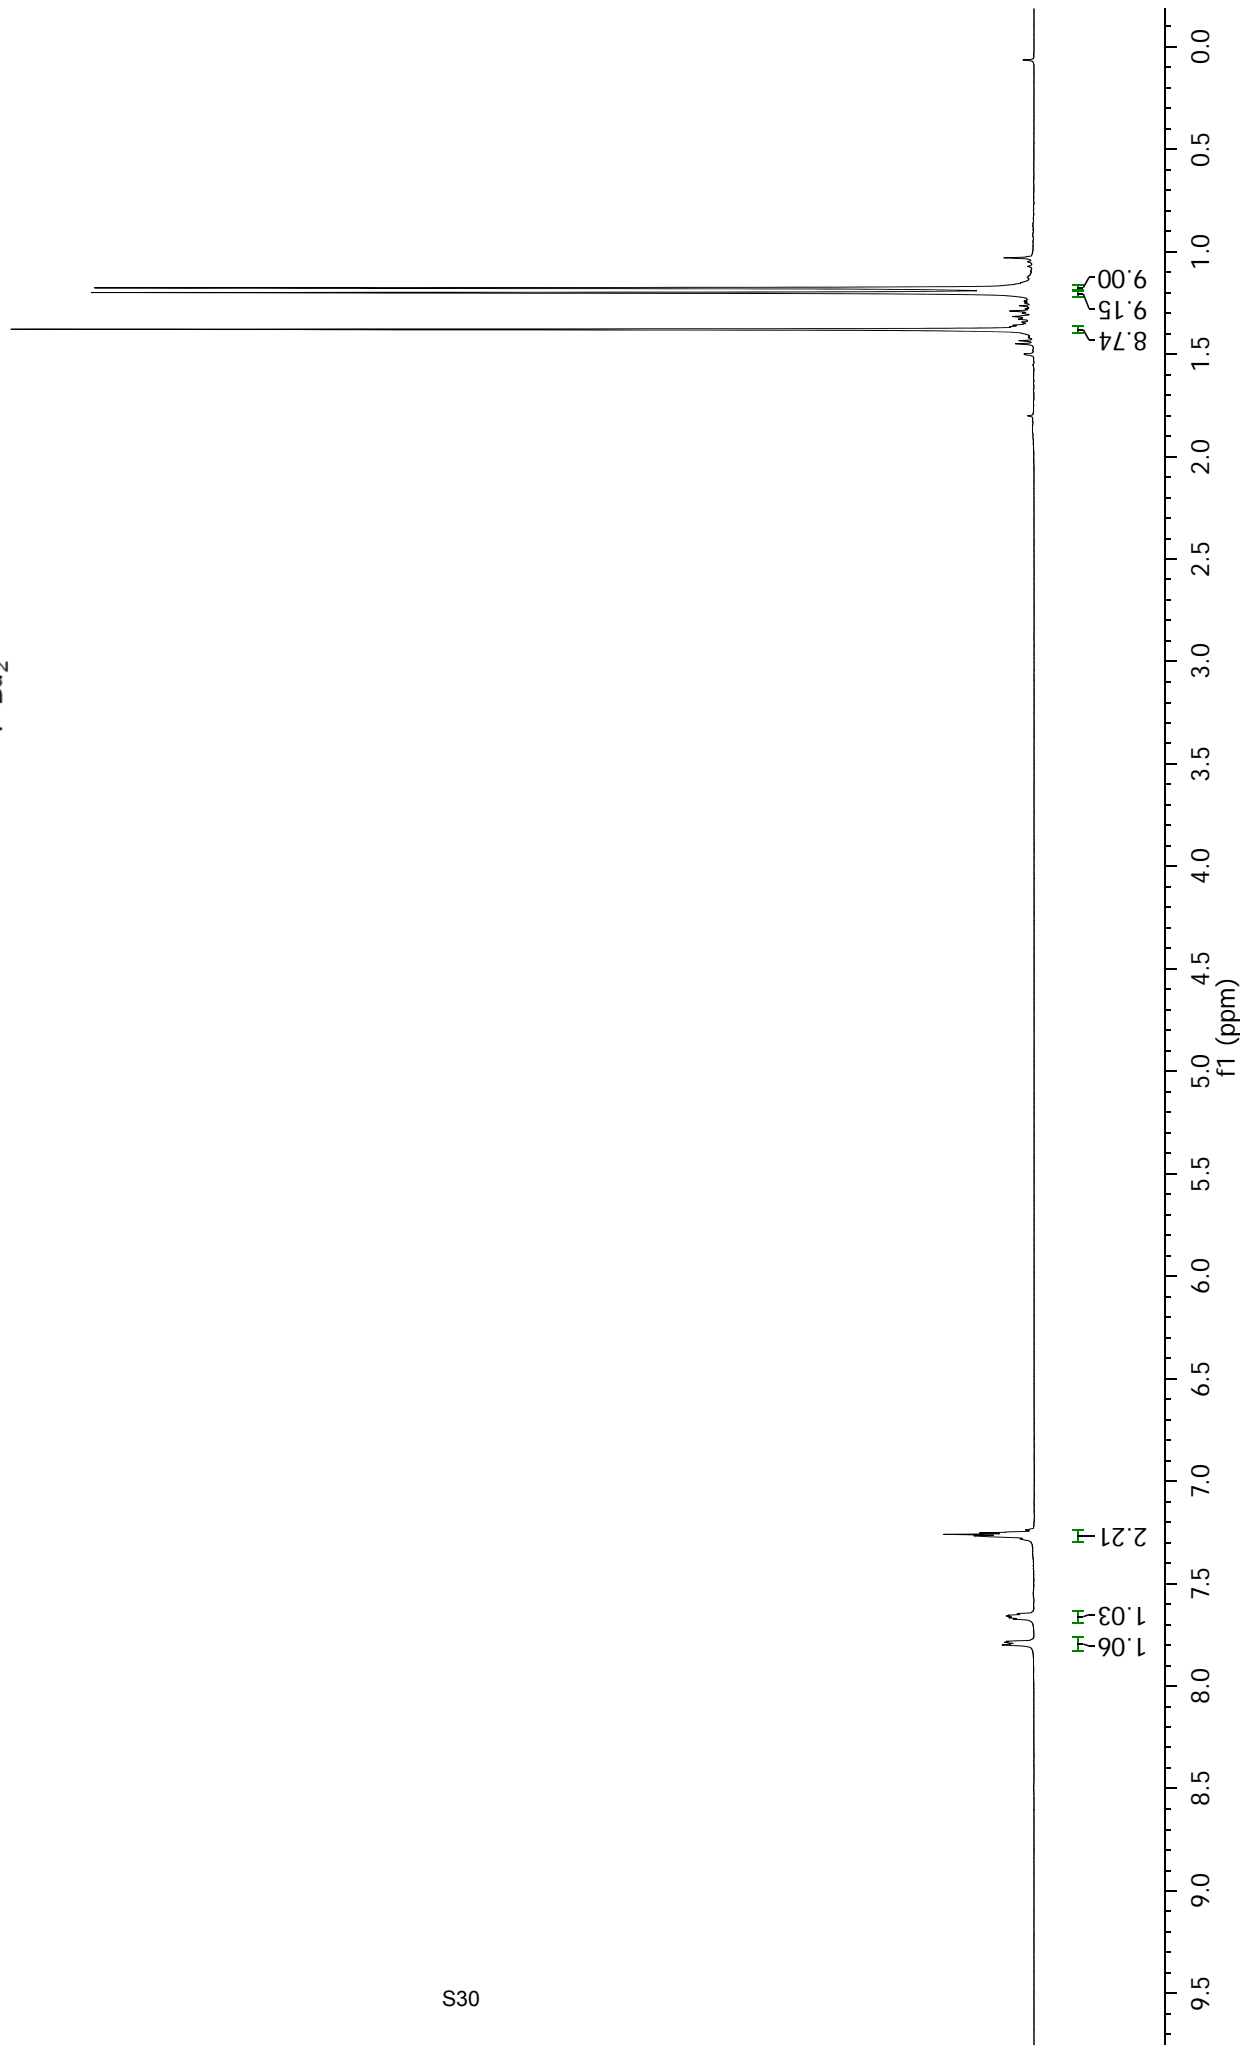

Title jkg-lll-118-C  
Solvent CDCl3  
Spectrometer Frequency 125.70

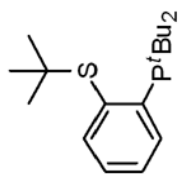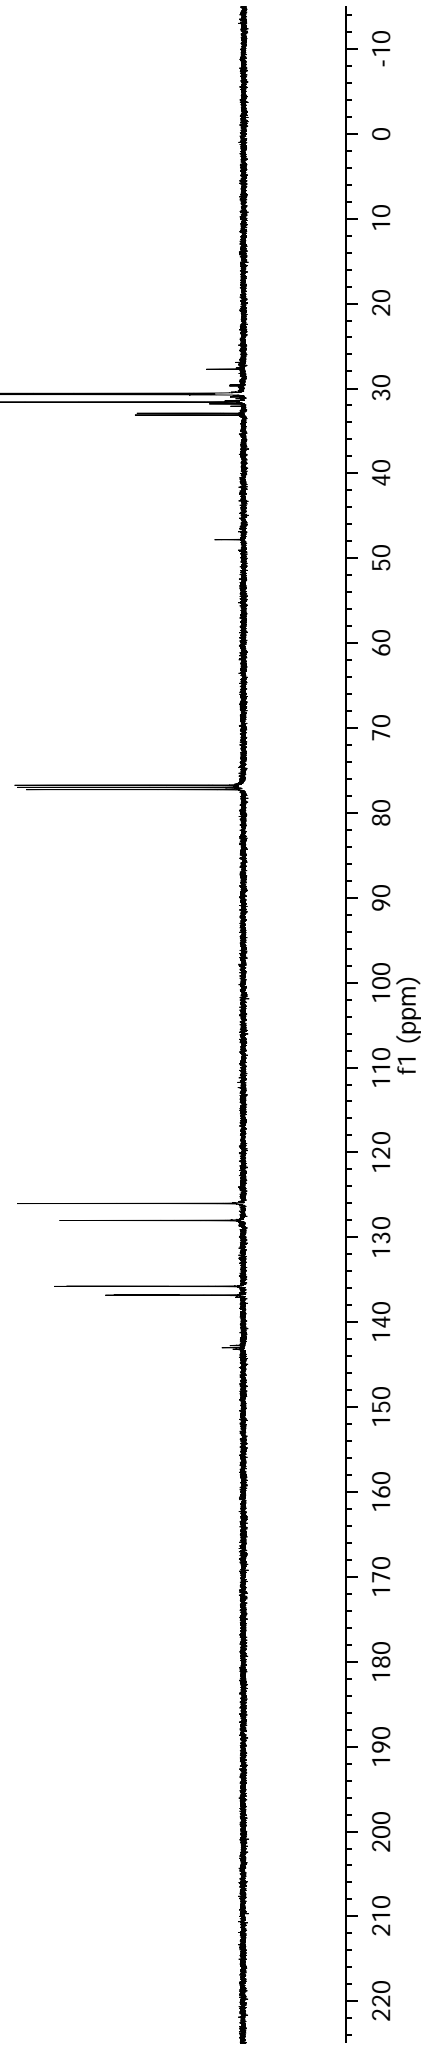

Title jkg-III-118-P  
Solvent cdc13  
Spectrometer Frequency 161.90

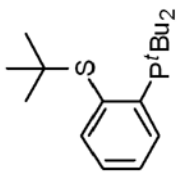

S32

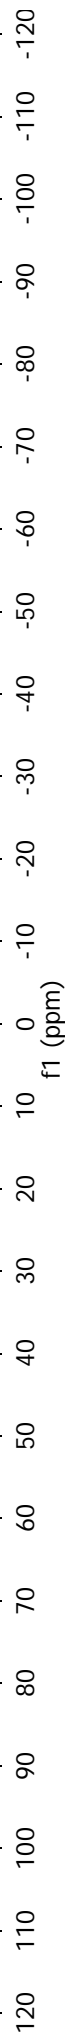

Title jkg-lll-119-H  
Solvent CDCl3  
Spectrometer Frequency 499.86

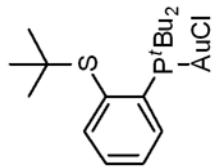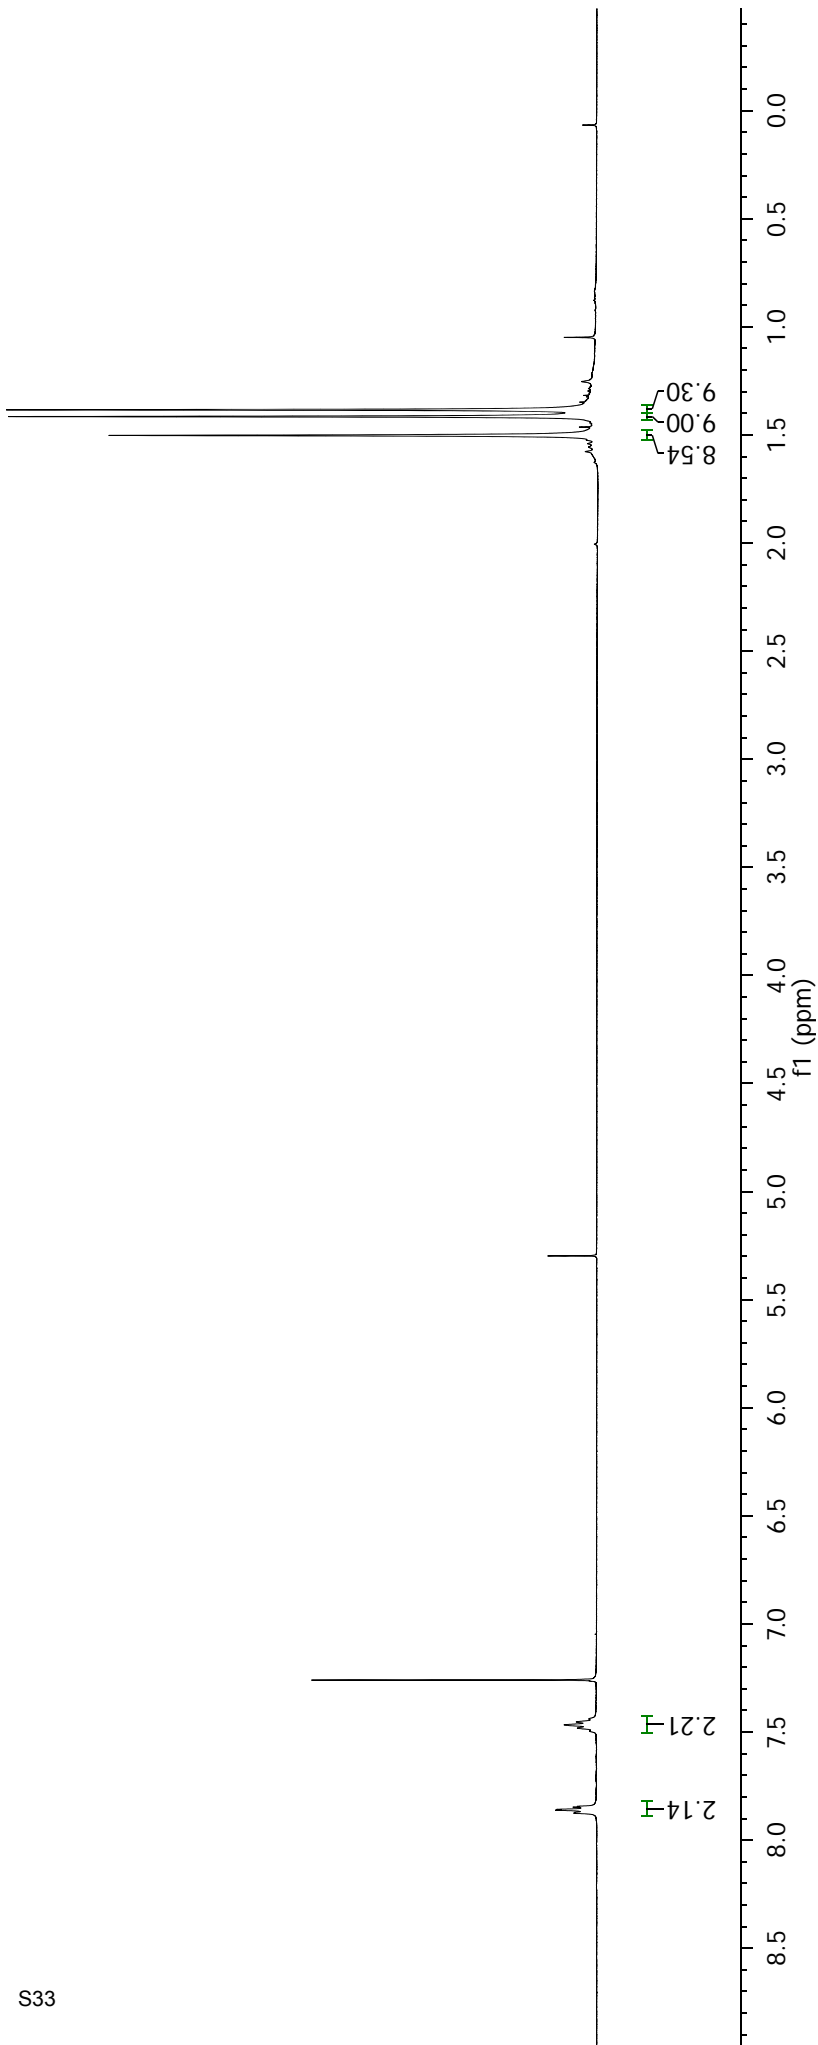

Title jkg-lll-119-C  
Solvent CDCl<sub>3</sub>  
Spectrometer Frequency 125.70

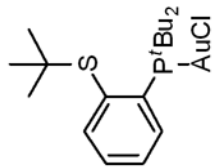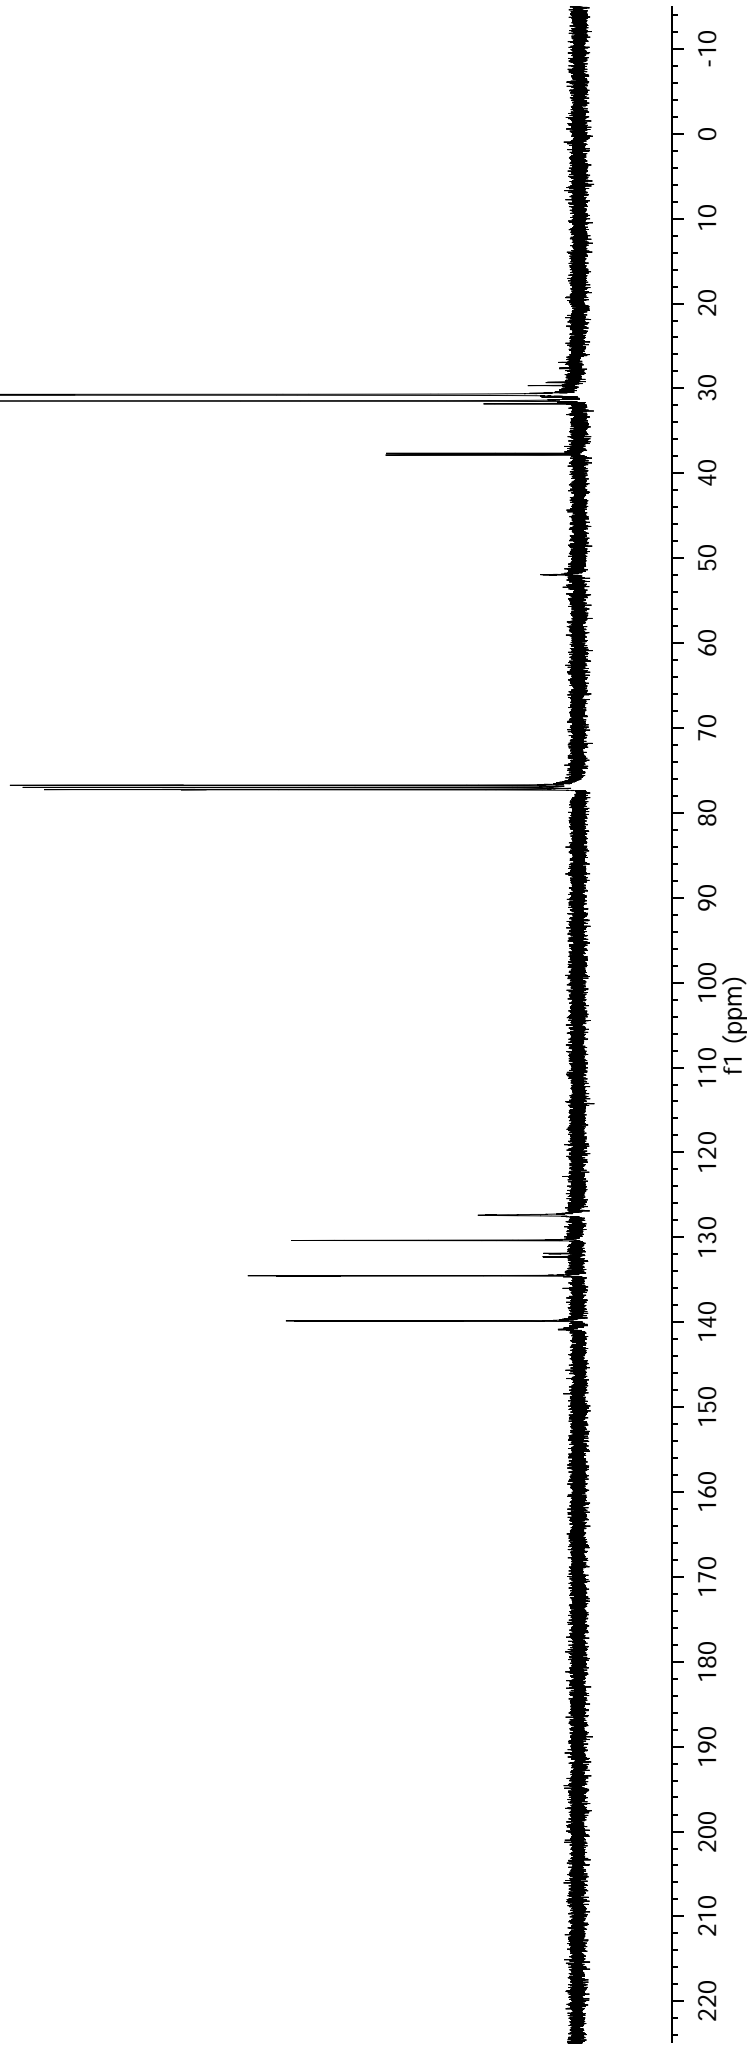

Title jkg-lll-119-P  
Solvent cdc13  
Spectrometer Frequency 161.90

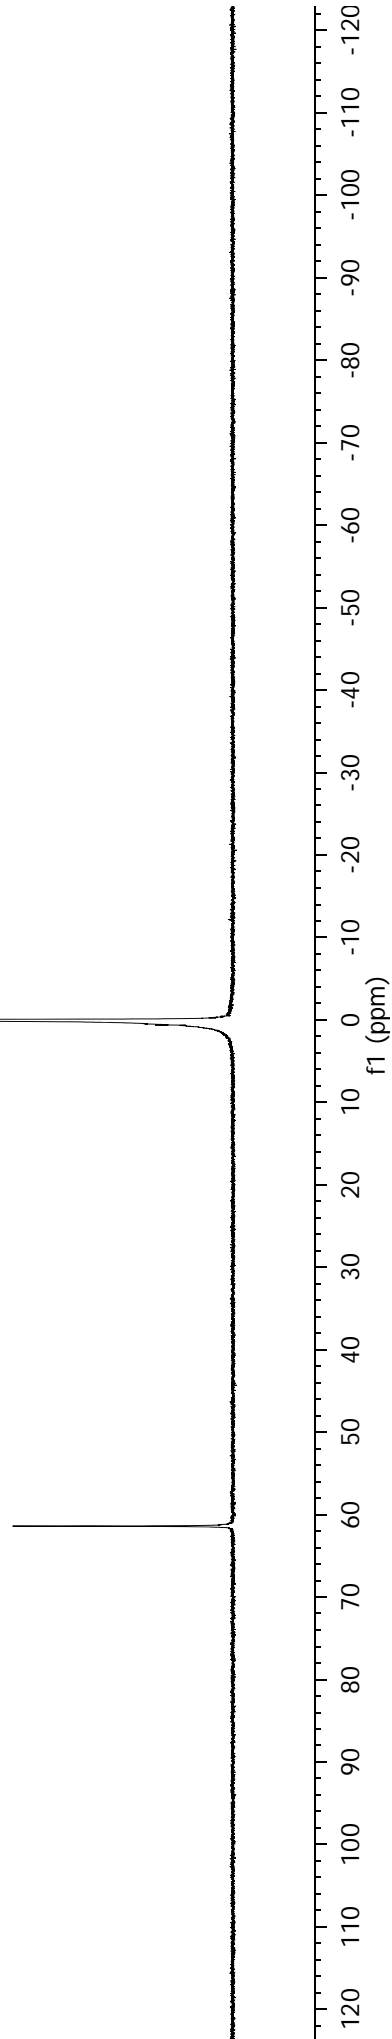

Title lyd-3-144-2proaffterptic  
Solvent CDCl3  
Spectrometer Frequency 499.86

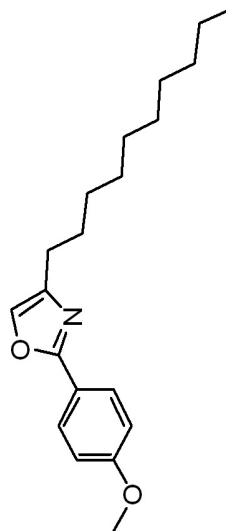

**3a**

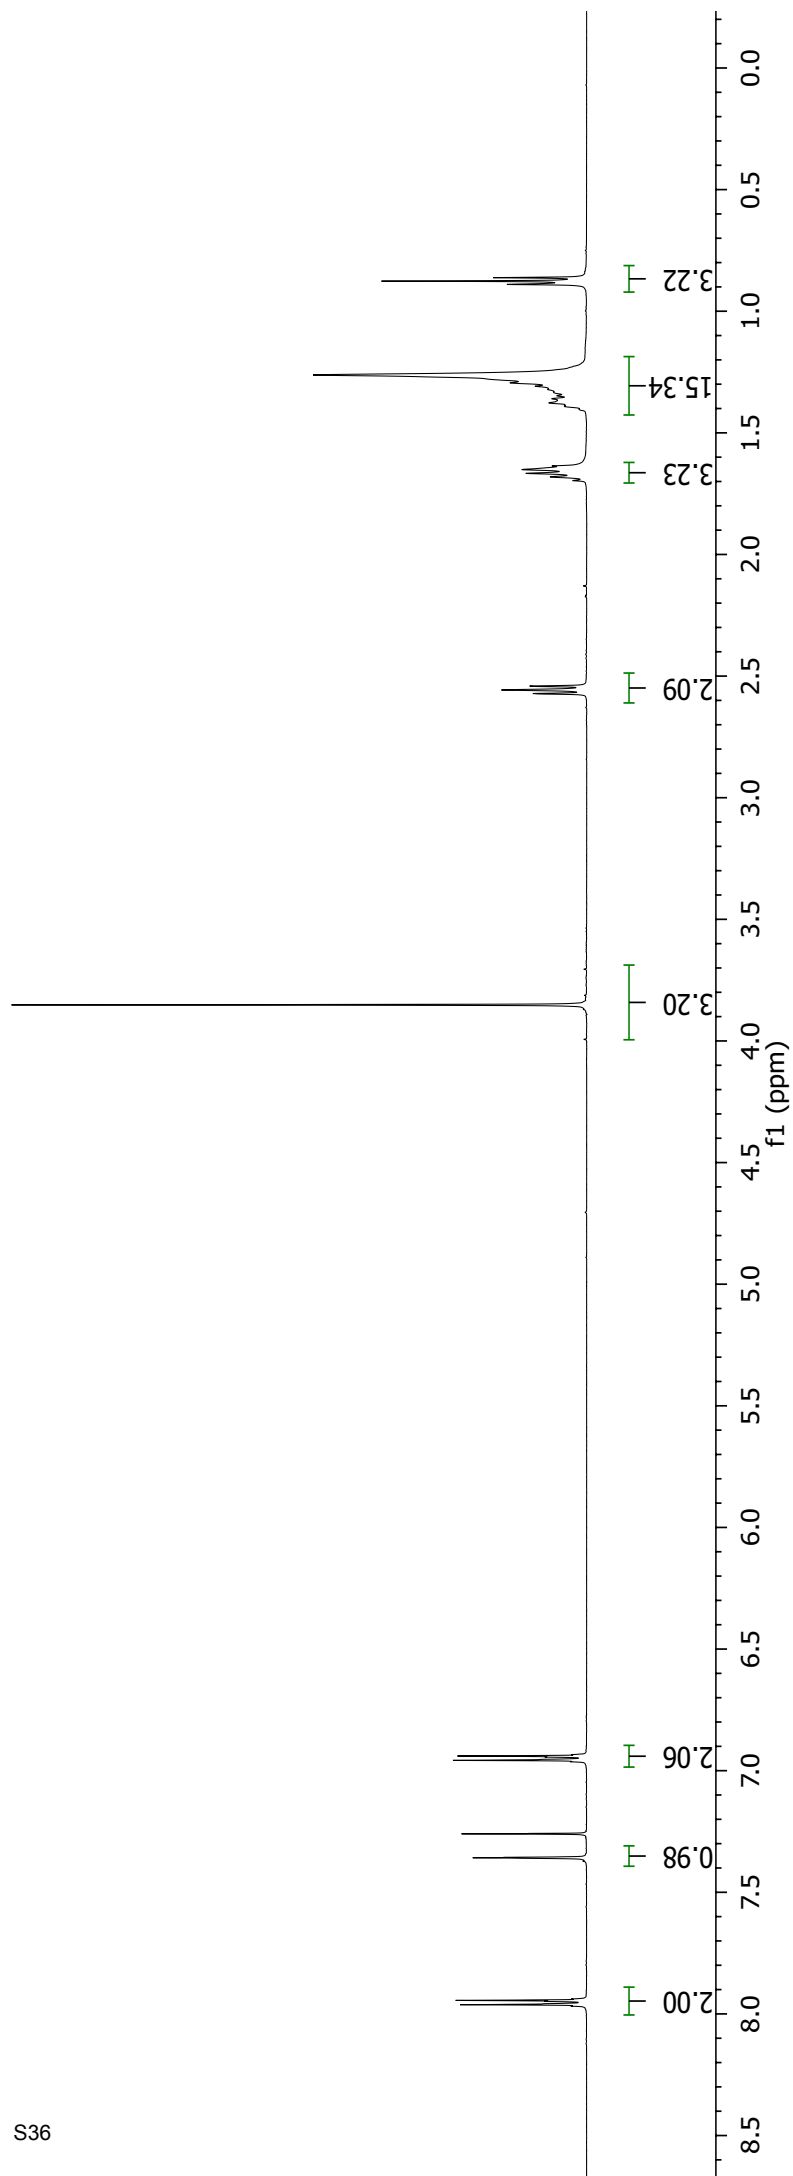





lyd-3-06152012pure

| Parameter                | Value              |
|--------------------------|--------------------|
| 1 Title                  | lyd-3-06152012pure |
| 2 Solvent                | CDCl <sub>3</sub>  |
| 3 Spectrometer Frequency | 499.86             |

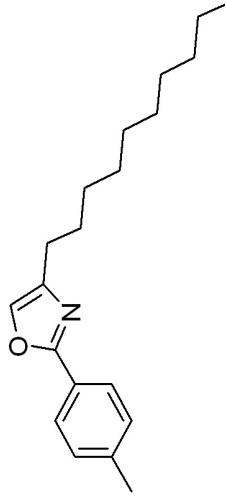

**3b**

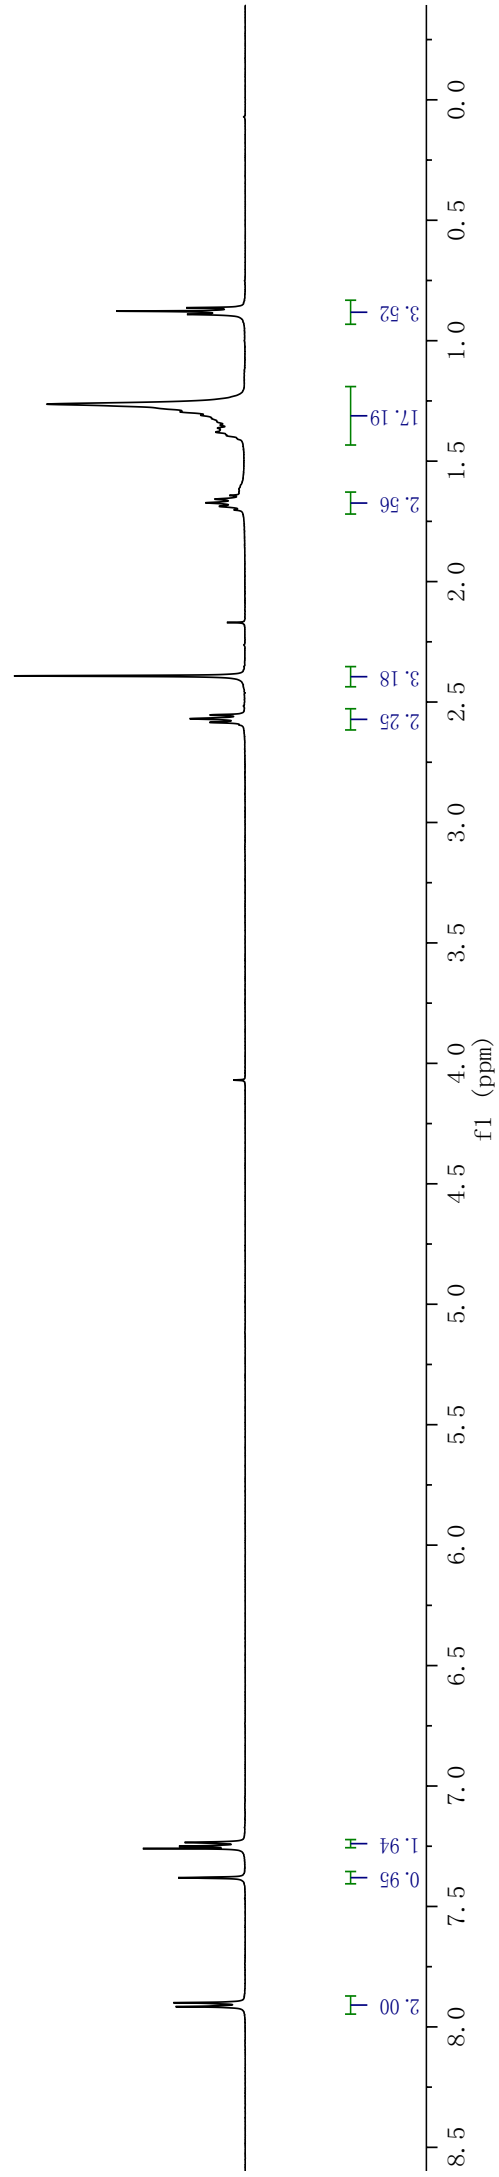

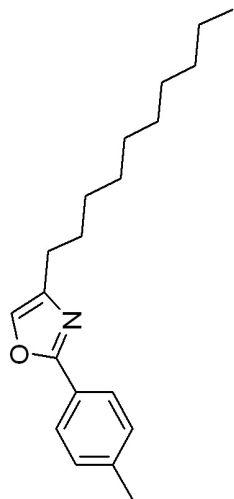

**3b**

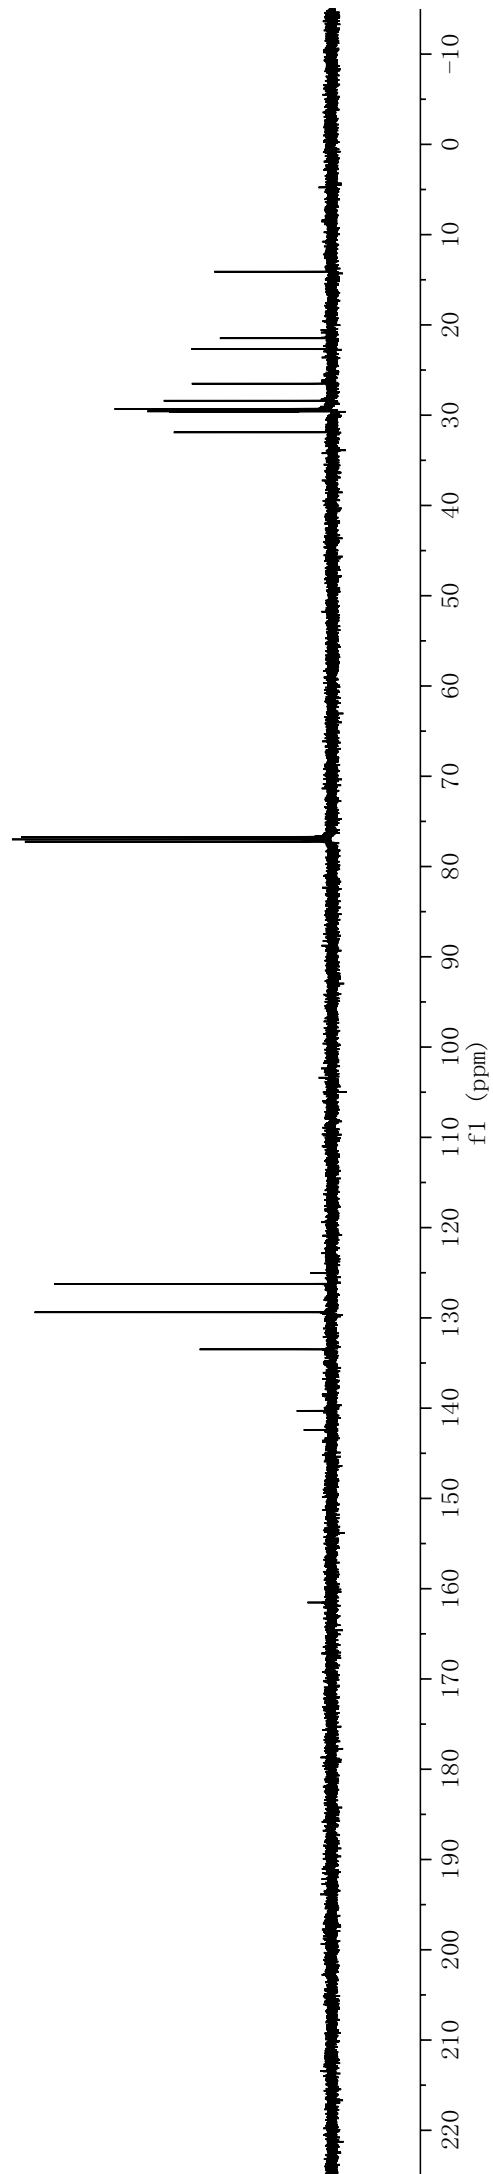

Title lyd-3-204  
Solvent CDCl3  
Spectrometer Frequency 499.86

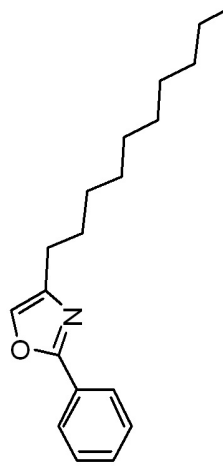

**3c**

S40

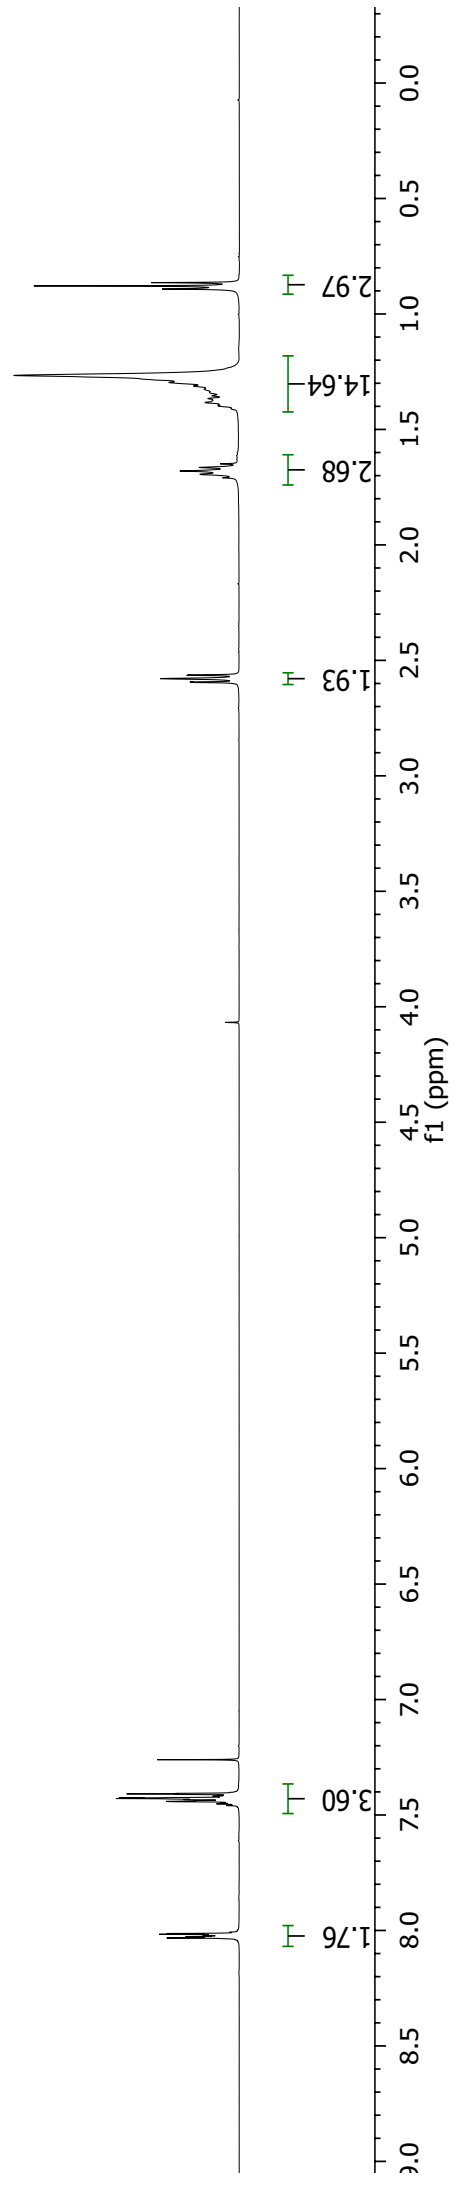

Title lyd-3-204-c-2  
Solvent CDCl3  
Spectrometer Frequency 125.70

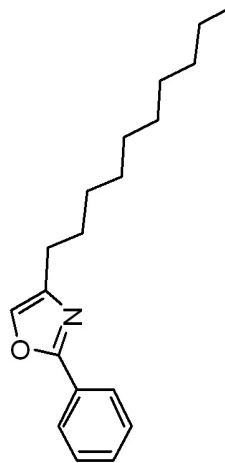

3c

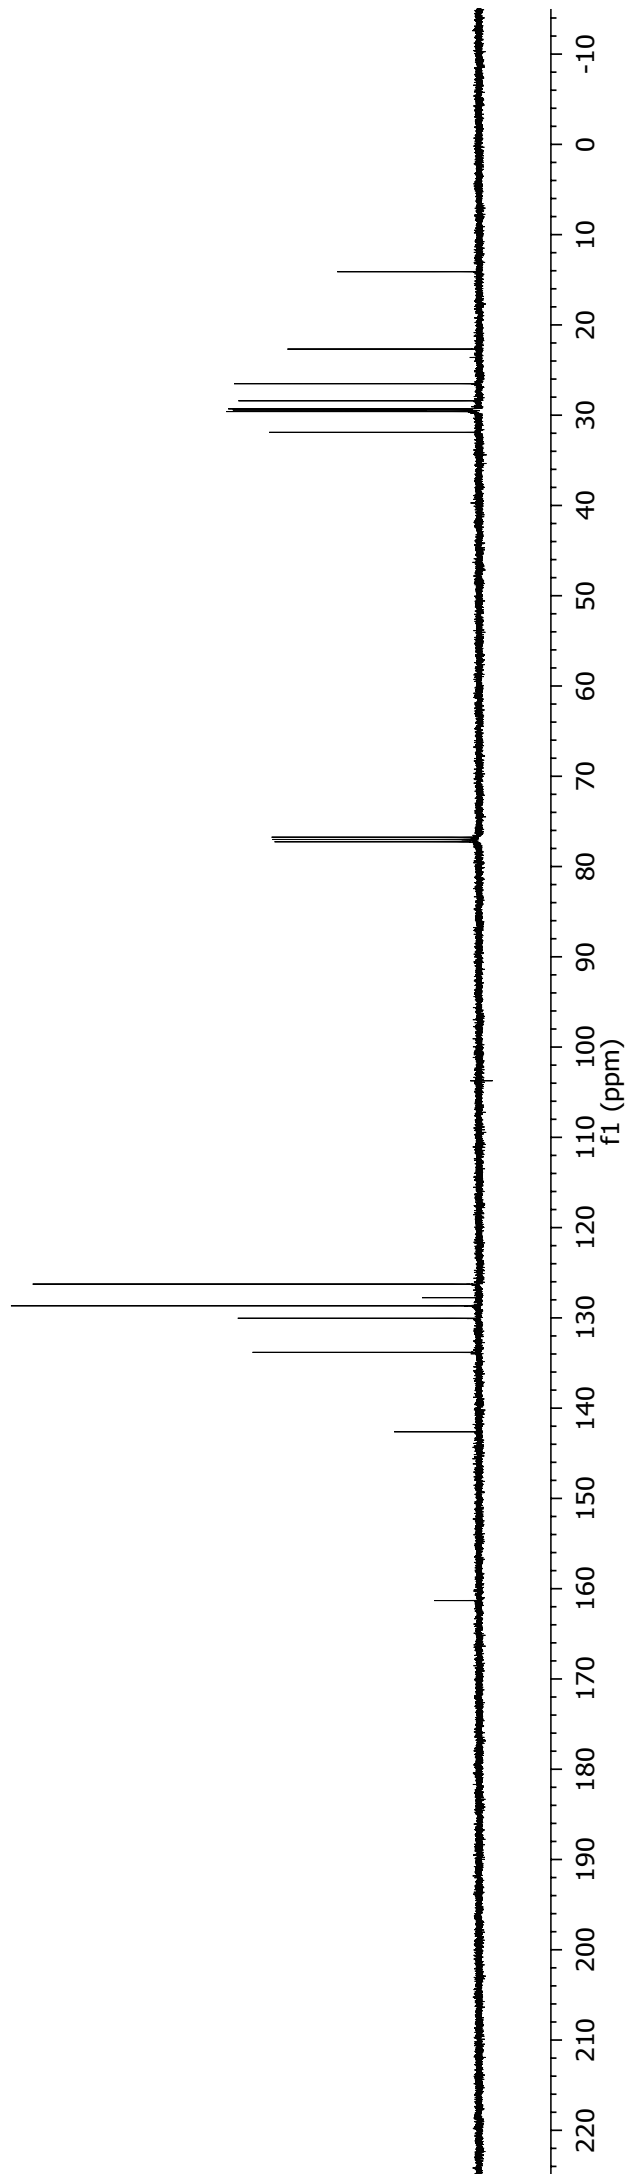

Title lyd-3-221-2-pure  
Solvent CDCl3  
Spectrometer Frequency 499.86

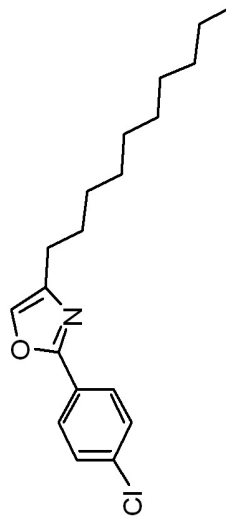

3d

S42

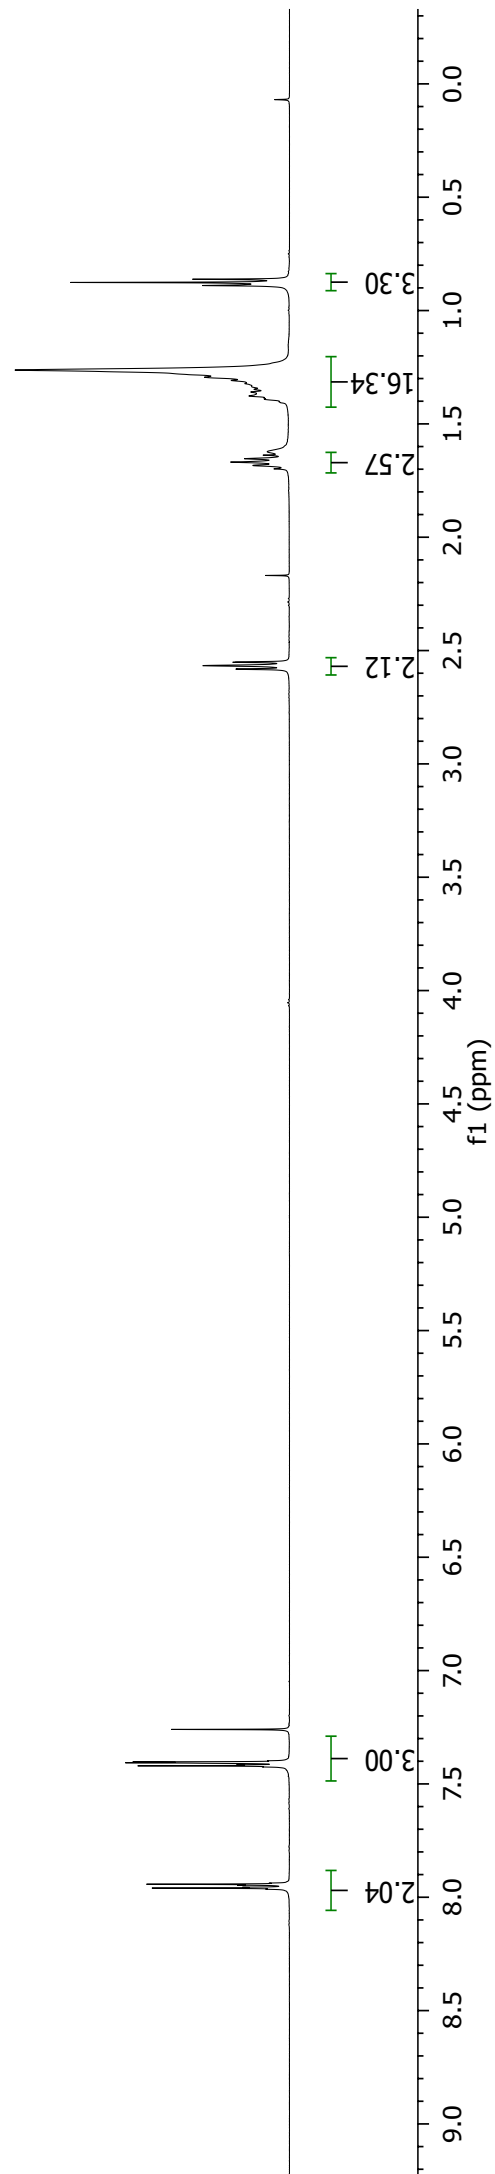

Title lyd-3-221-2-pure-C  
Solvent CDCl<sub>3</sub>  
Spectrometer Frequency 125.70

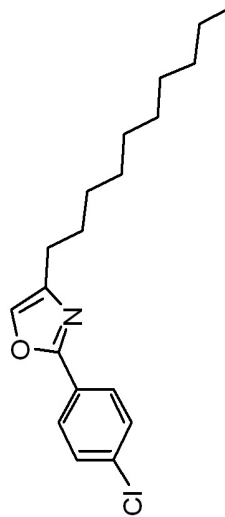

3d

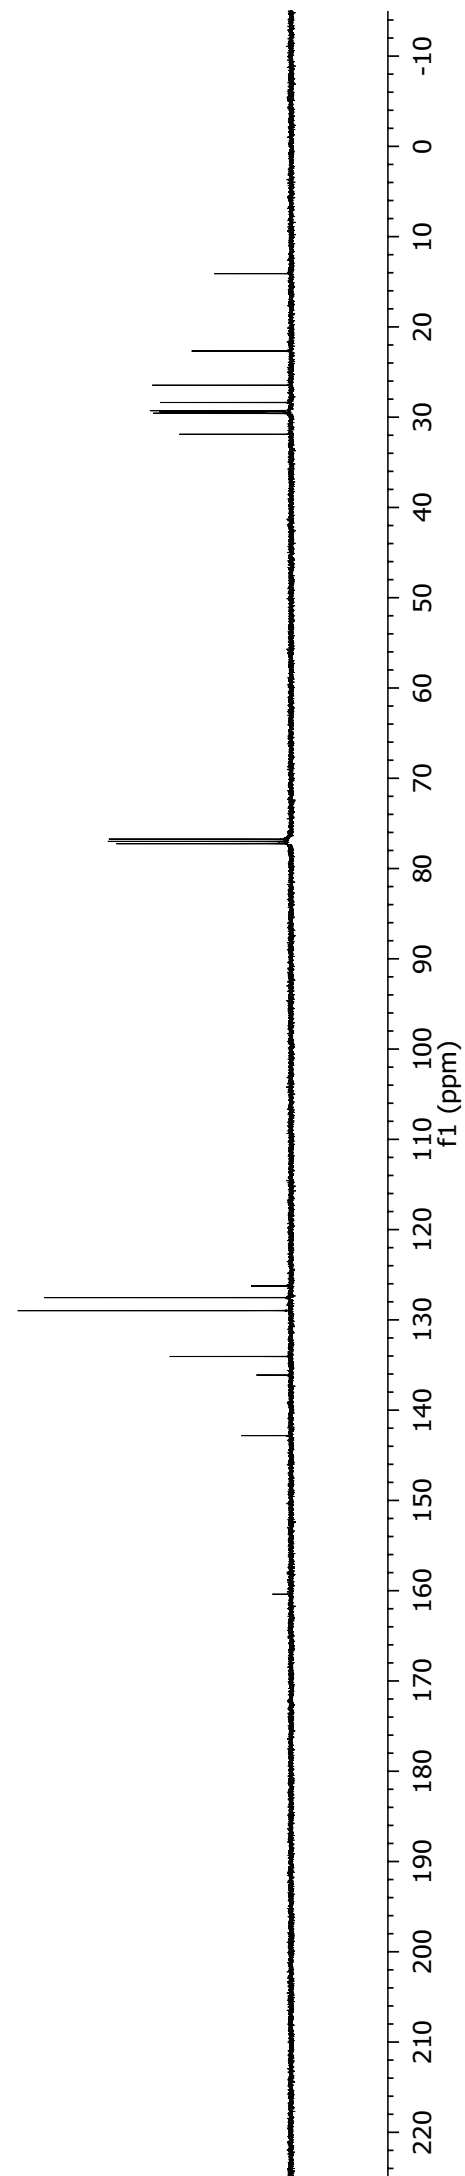

Title lyd-3-226-2-pro  
Solvent CDCl3  
Spectrometer Frequency 499.86

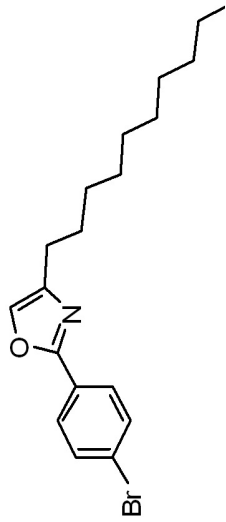

3e

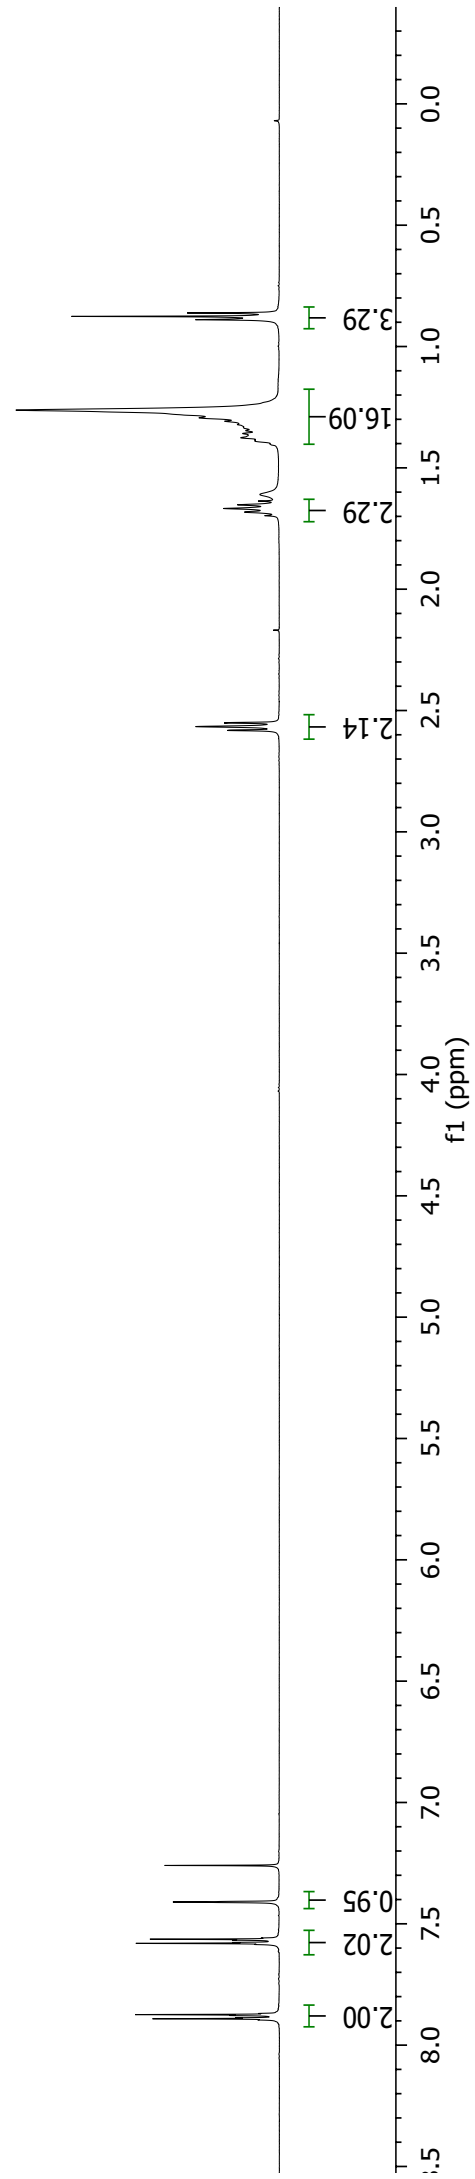



Title lyd-3-226-2-pro-C  
Solvent CDCl3  
Spectrometer Frequency 125.70

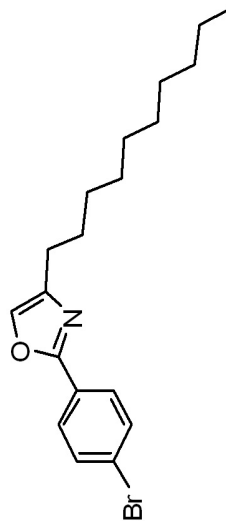

3e

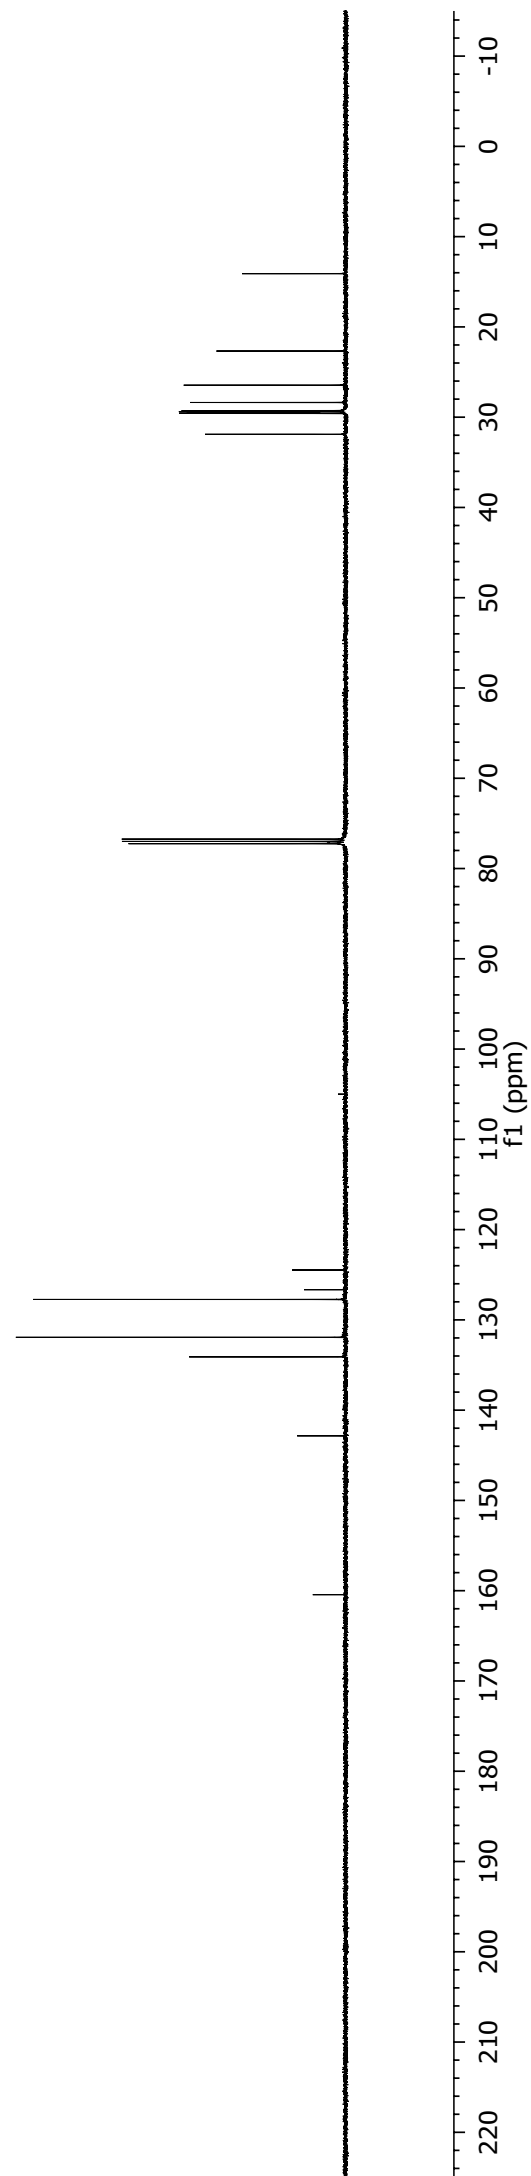

Title lyd-3-210  
Solvent CDCl3  
Spectrometer Frequency 499.86

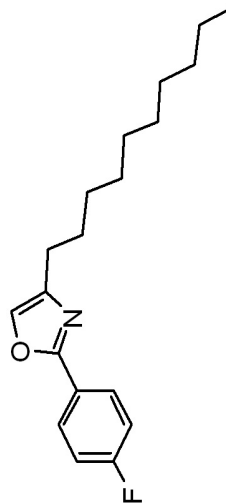

**3f**

S46

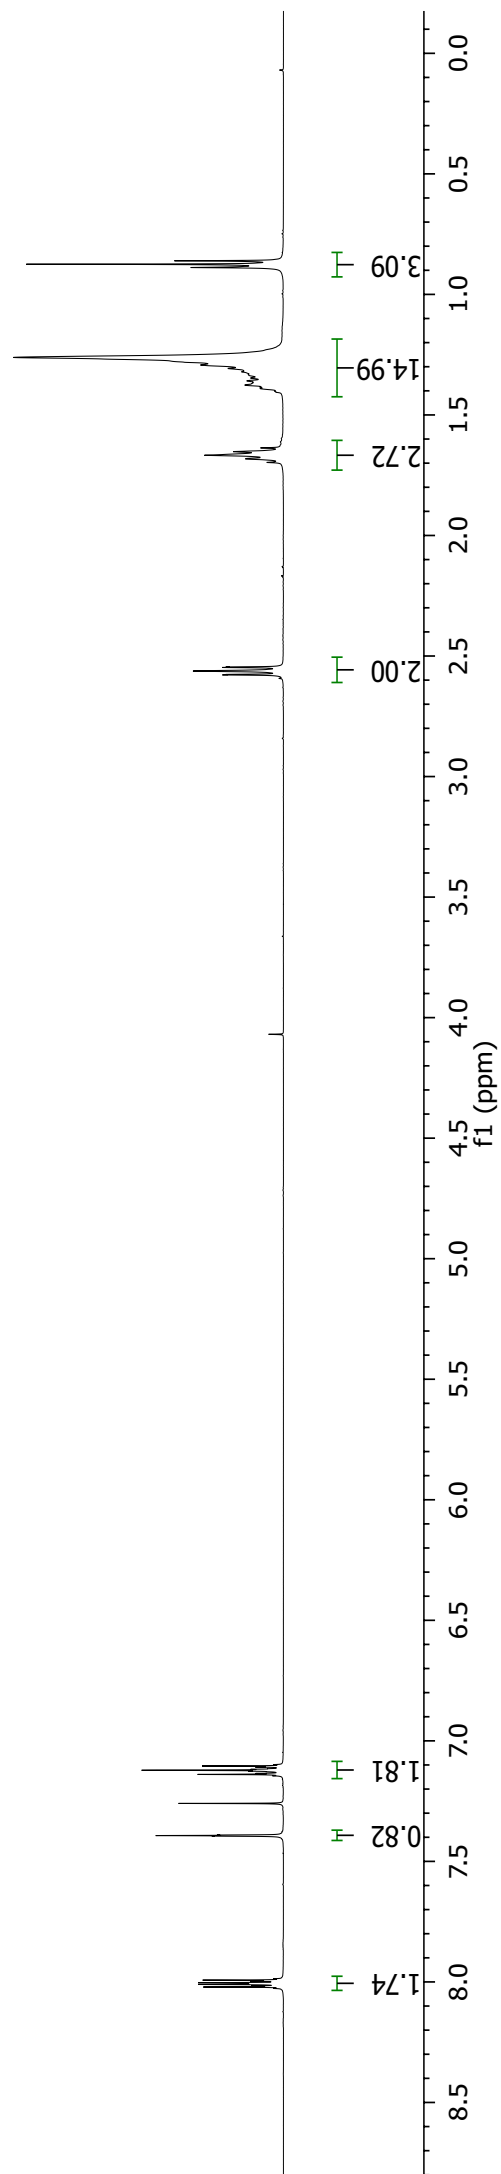

Title lyd-3-210-C-1  
Solvent CDCl<sub>3</sub>  
Spectrometer Frequency 125.70

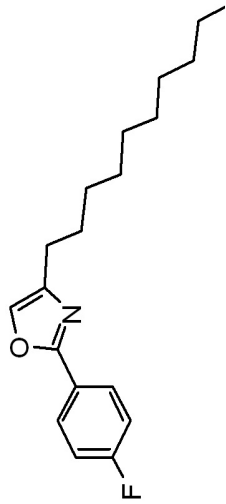

**3f**

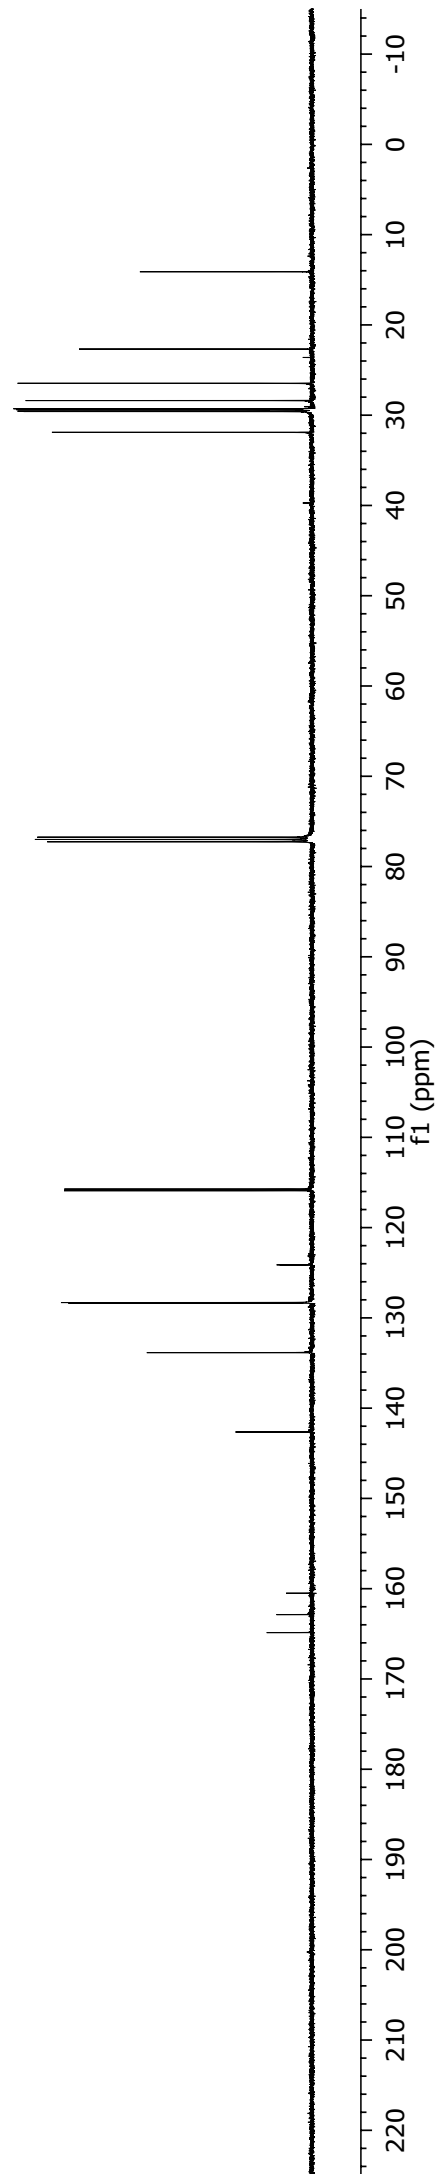

Title lyd-3-211-pure  
Solvent CDCl3  
Spectrometer Frequency 499.86

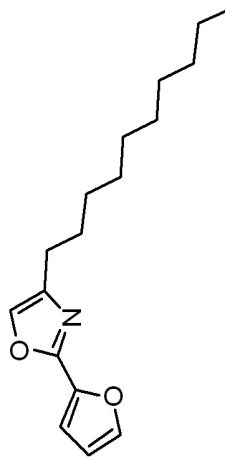

3g

S48

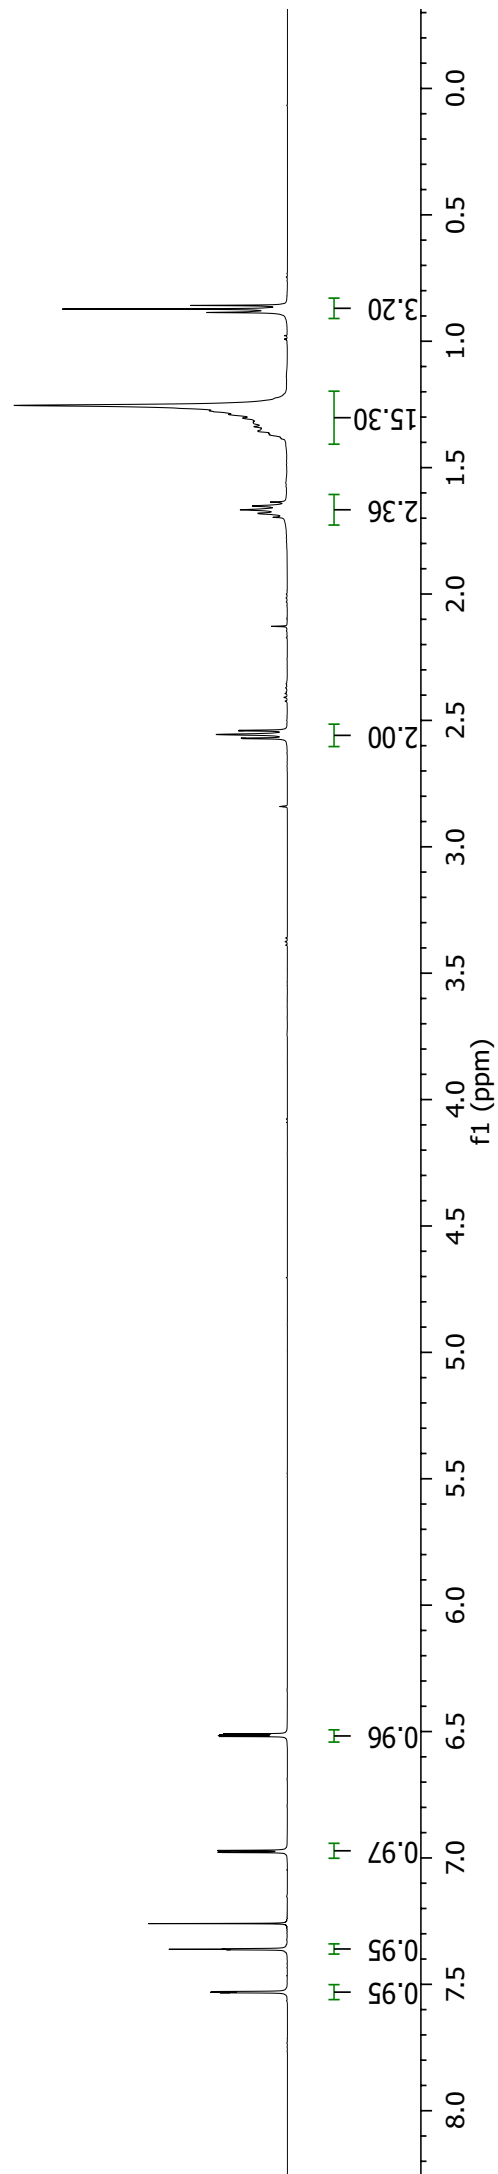

Title lyd-3-211-pure-C2  
Solvent CDCl3  
Spectrometer Frequency 125.70

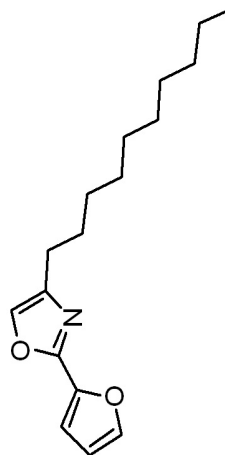

3g

S49

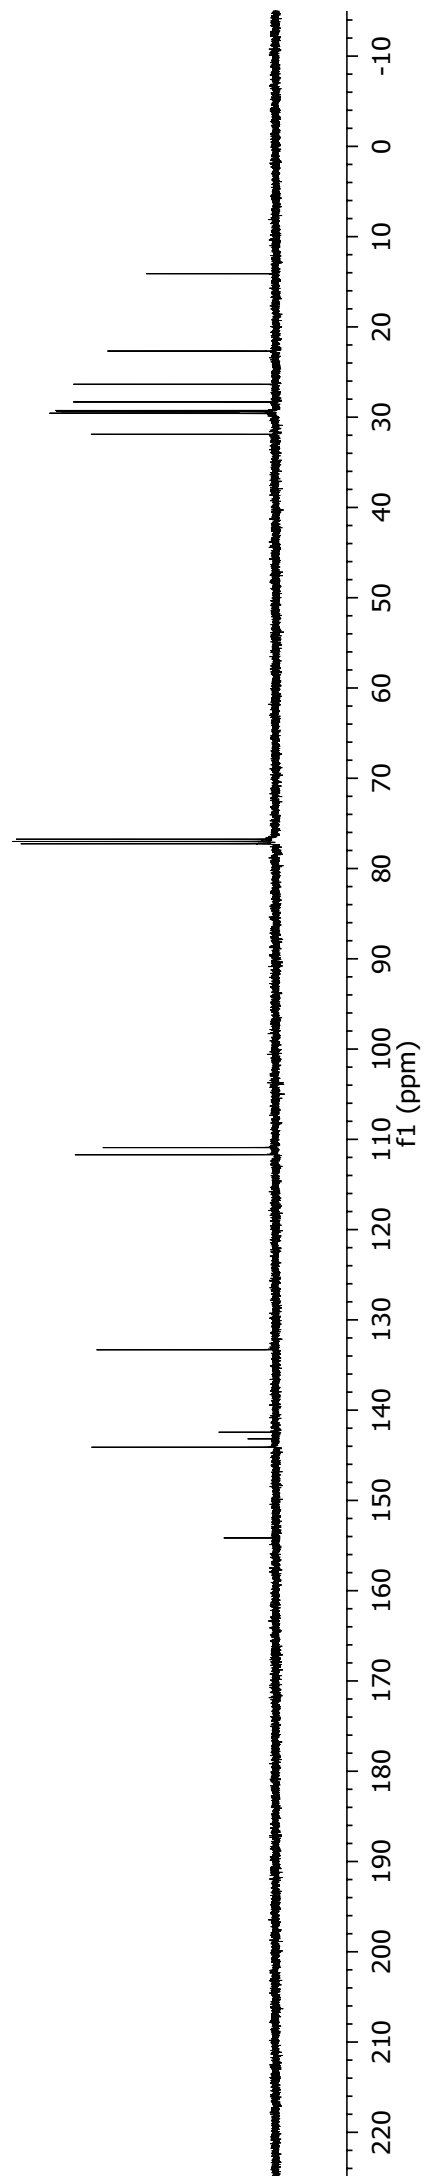

Title lyd-3-221-1-pure  
Solvent CDCl3  
Spectrometer Frequency 499.86

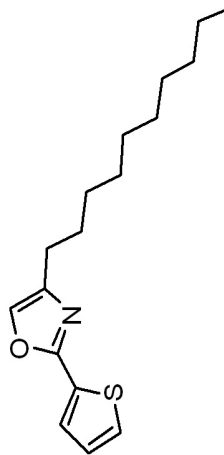

**3h**

S50

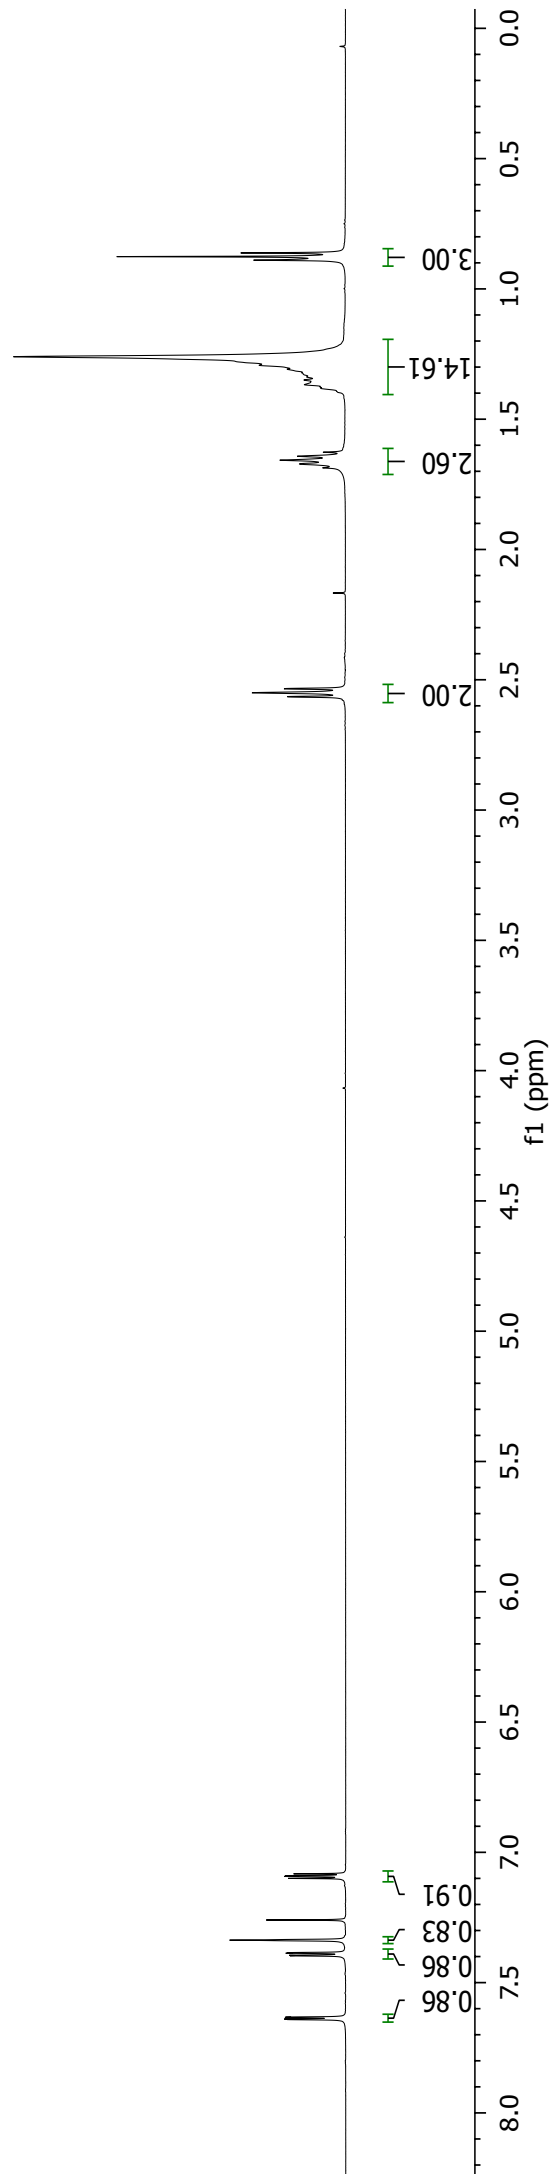

Title lyd-3-221-1-pure-C  
Solvent CDCl3  
Spectrometer Frequency 125.70

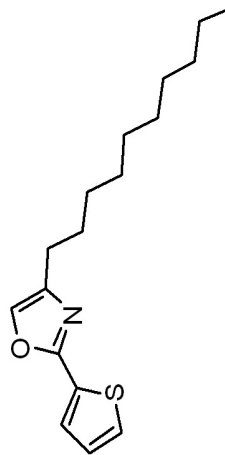

**3h**

S51

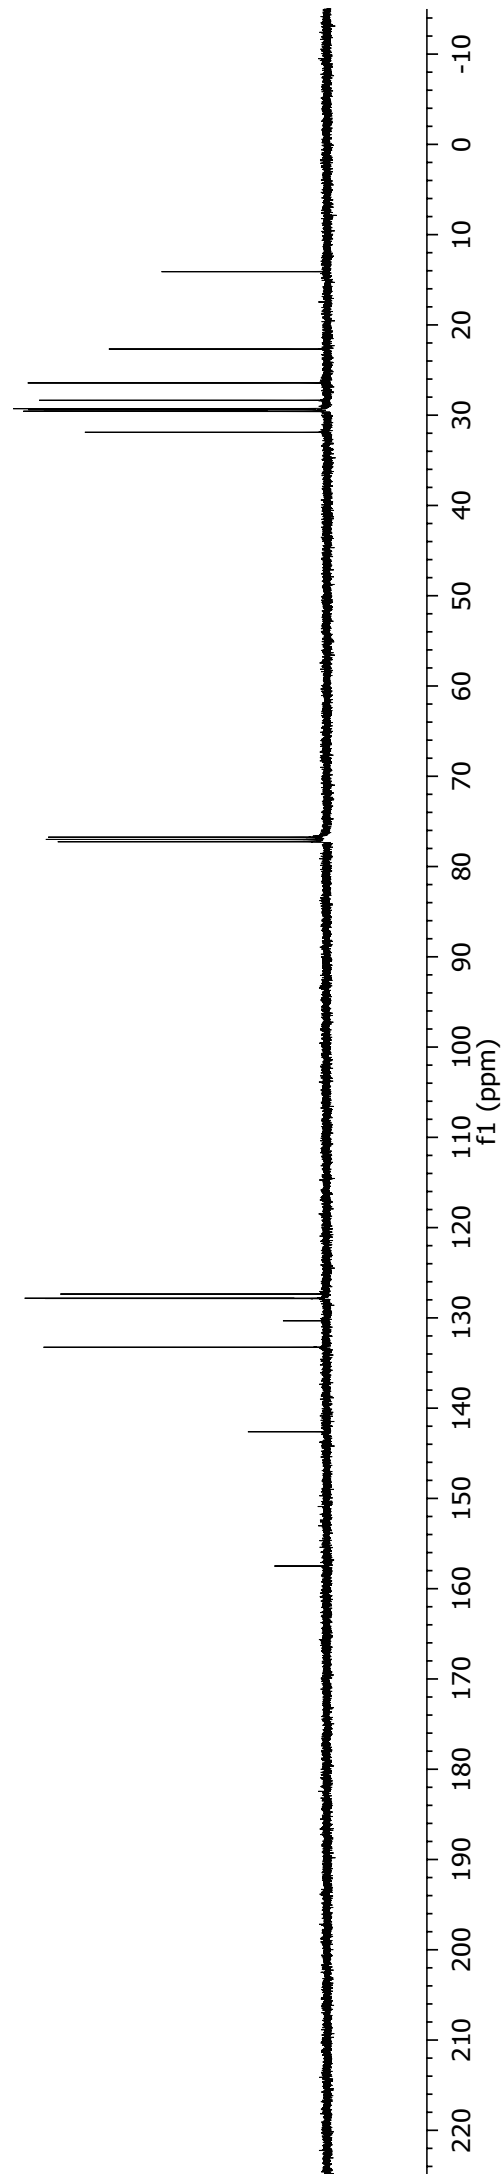

Title lyd-3-212-3-pure  
Solvent CDCl3  
Spectrometer Frequency 499.86

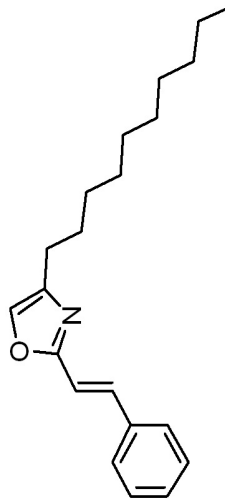

**3i**

S52

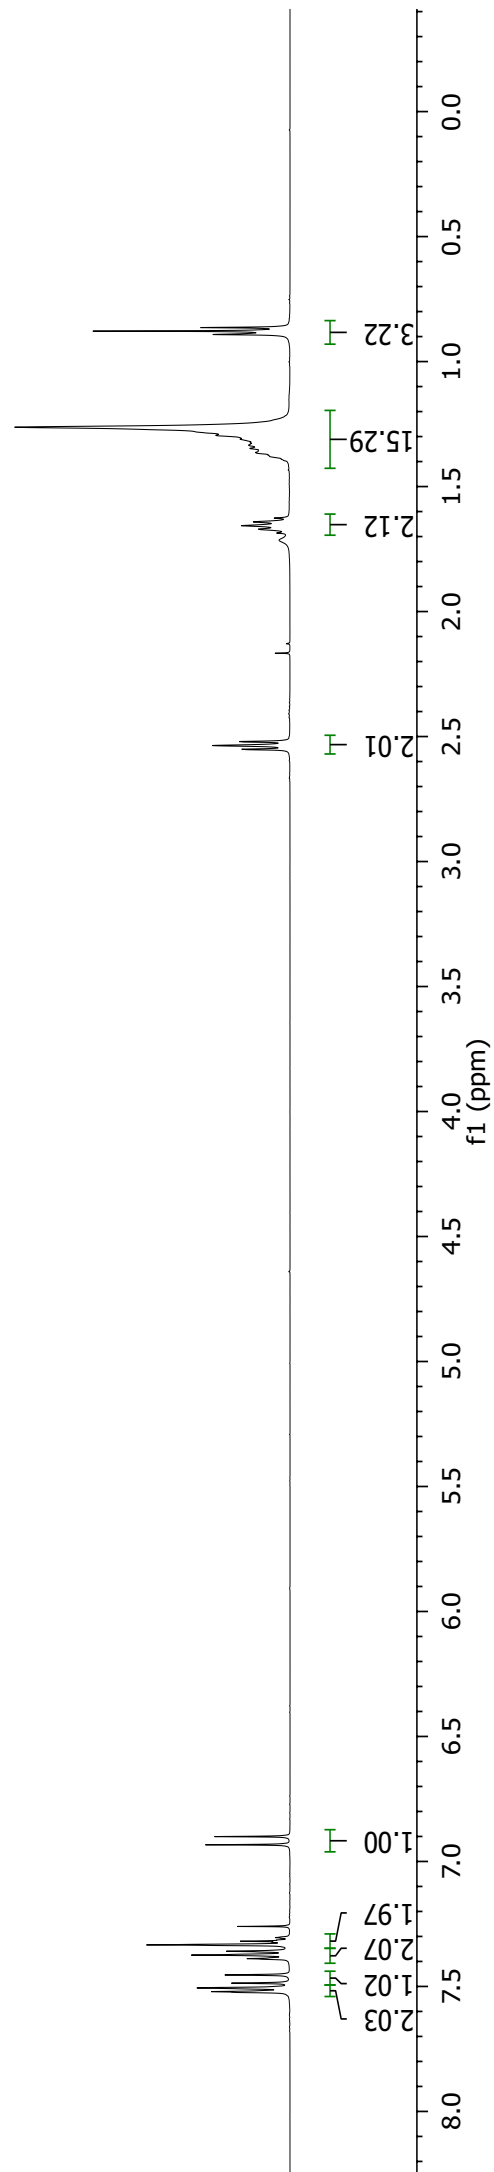



Title lyd-3-212-3-C  
Solvent CDCl<sub>3</sub>  
Spectrometer Frequency 125.70

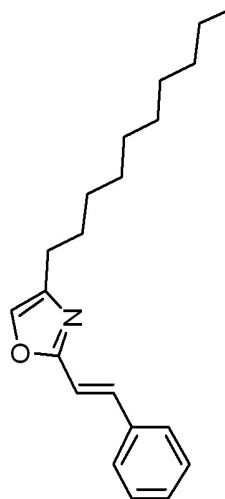

**3i**

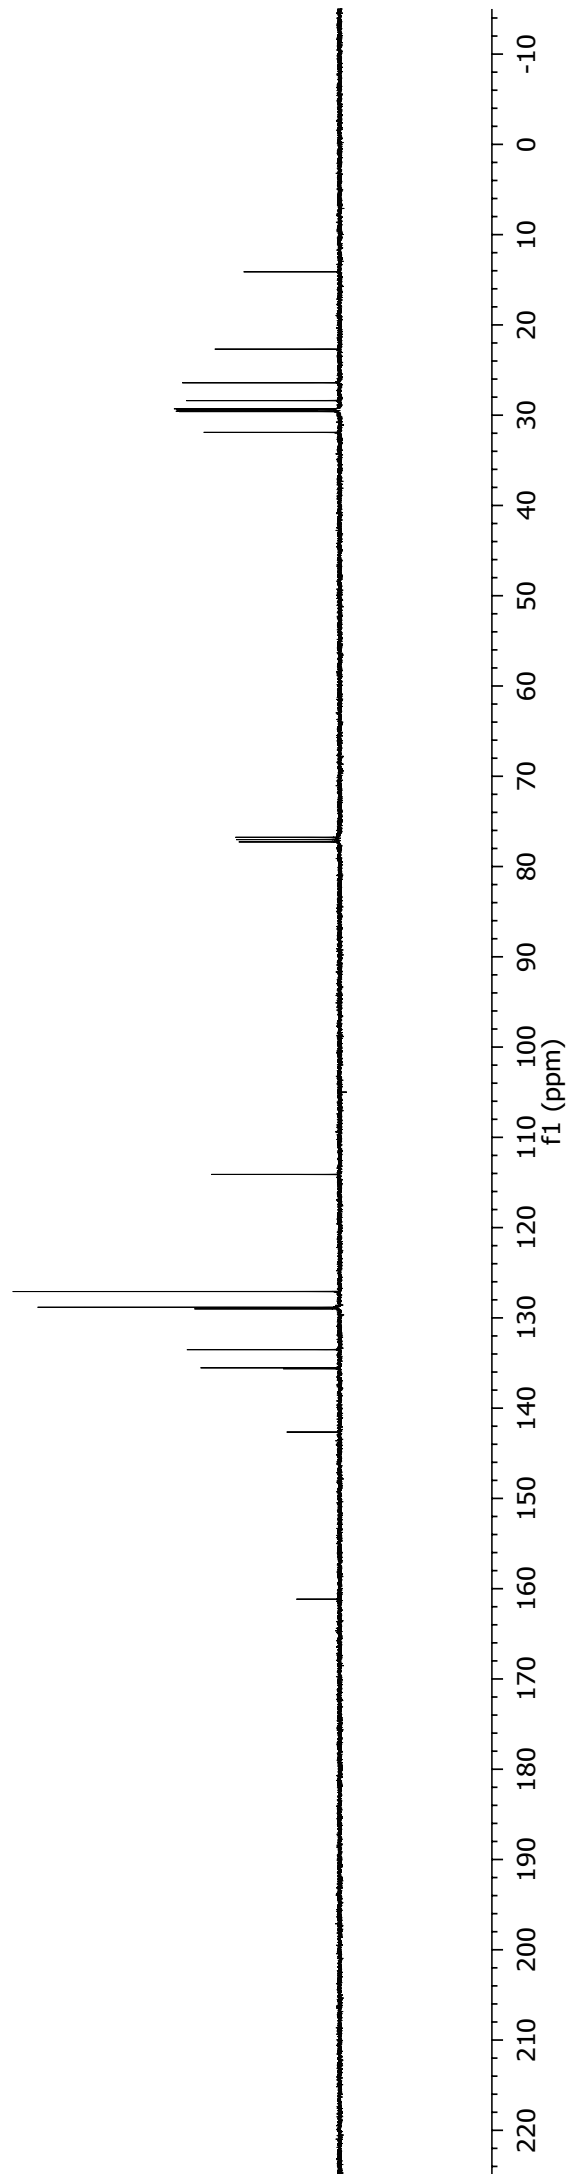

| Parameter                | Value       |
|--------------------------|-------------|
| 1 Title                  | lyd-3-237-1 |
| 2 Solvent                | CDCl3       |
| 3 Spectrometer Frequency | 499.86      |

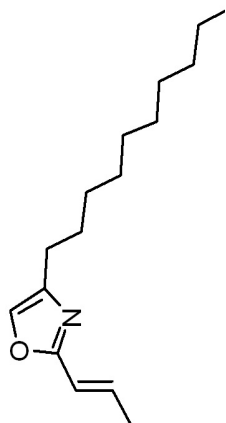

**3j**

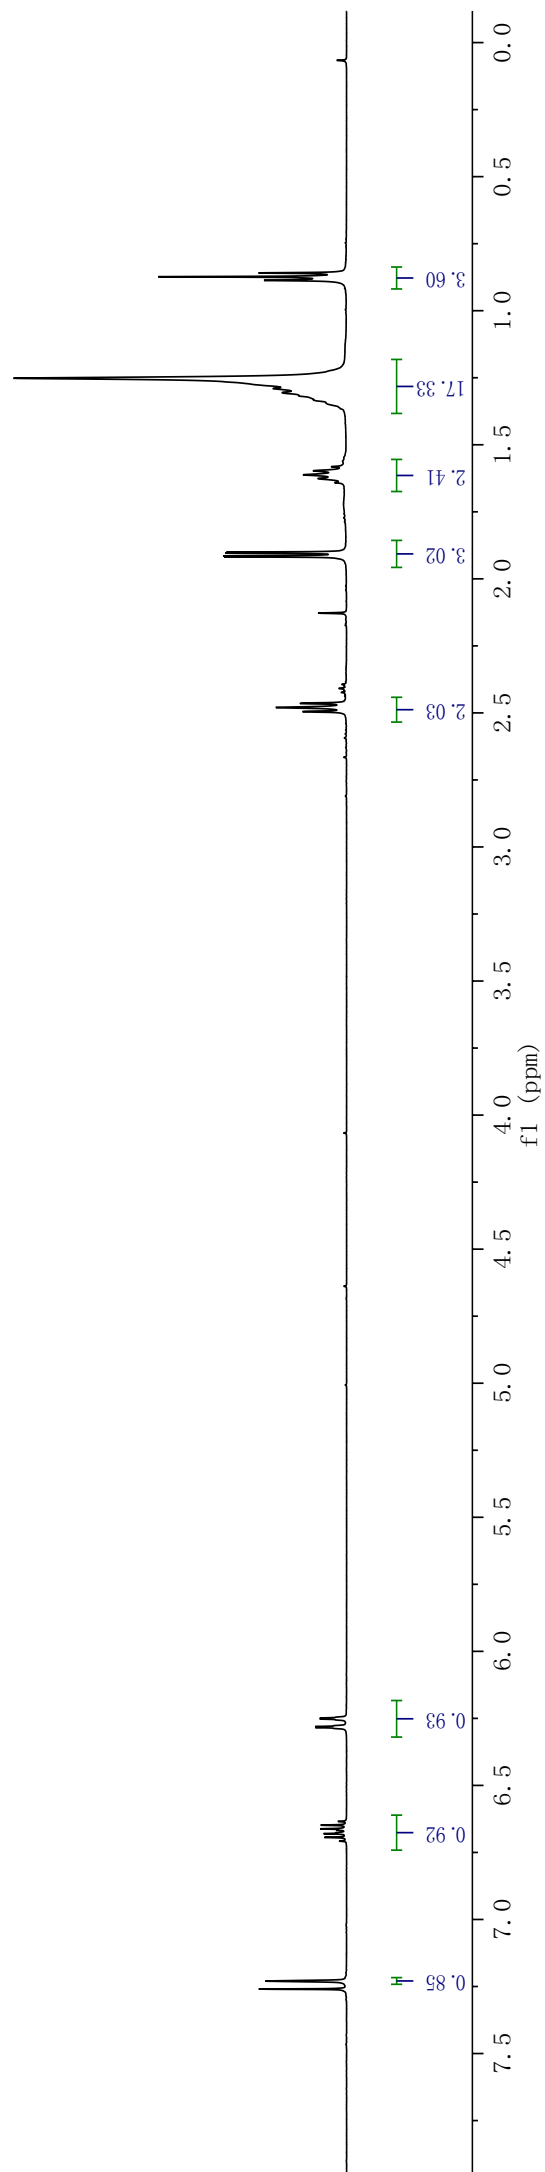

| Parameter                | Value         |
|--------------------------|---------------|
| 1 Title                  | lyd-3-237-1-C |
| 2 Solvent                | CDCl3         |
| 3 Spectrometer Frequency | 125.70        |



**3j**

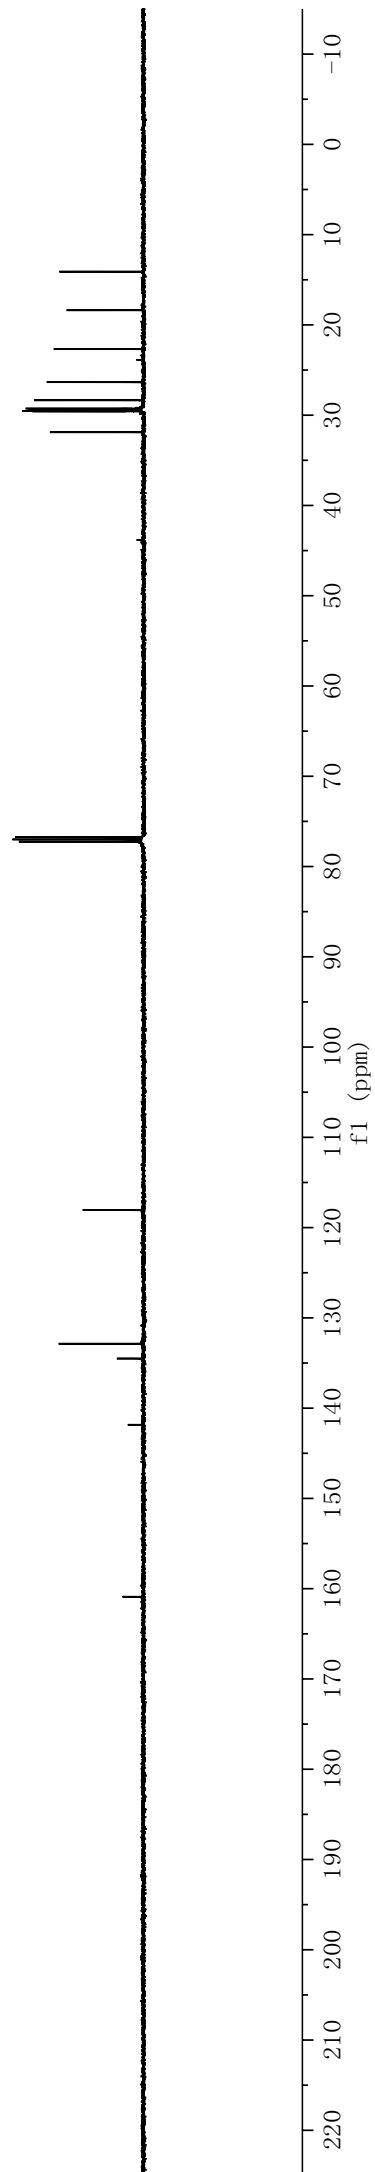

| Parameter                | Value       |
|--------------------------|-------------|
| 1 Title                  | lyd-3-237-2 |
| 2 Solvent                | cdcl3       |
| 3 Spectrometer Frequency | 399.95      |

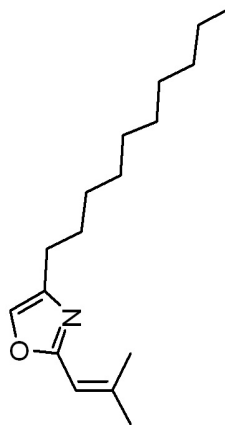

**3k**

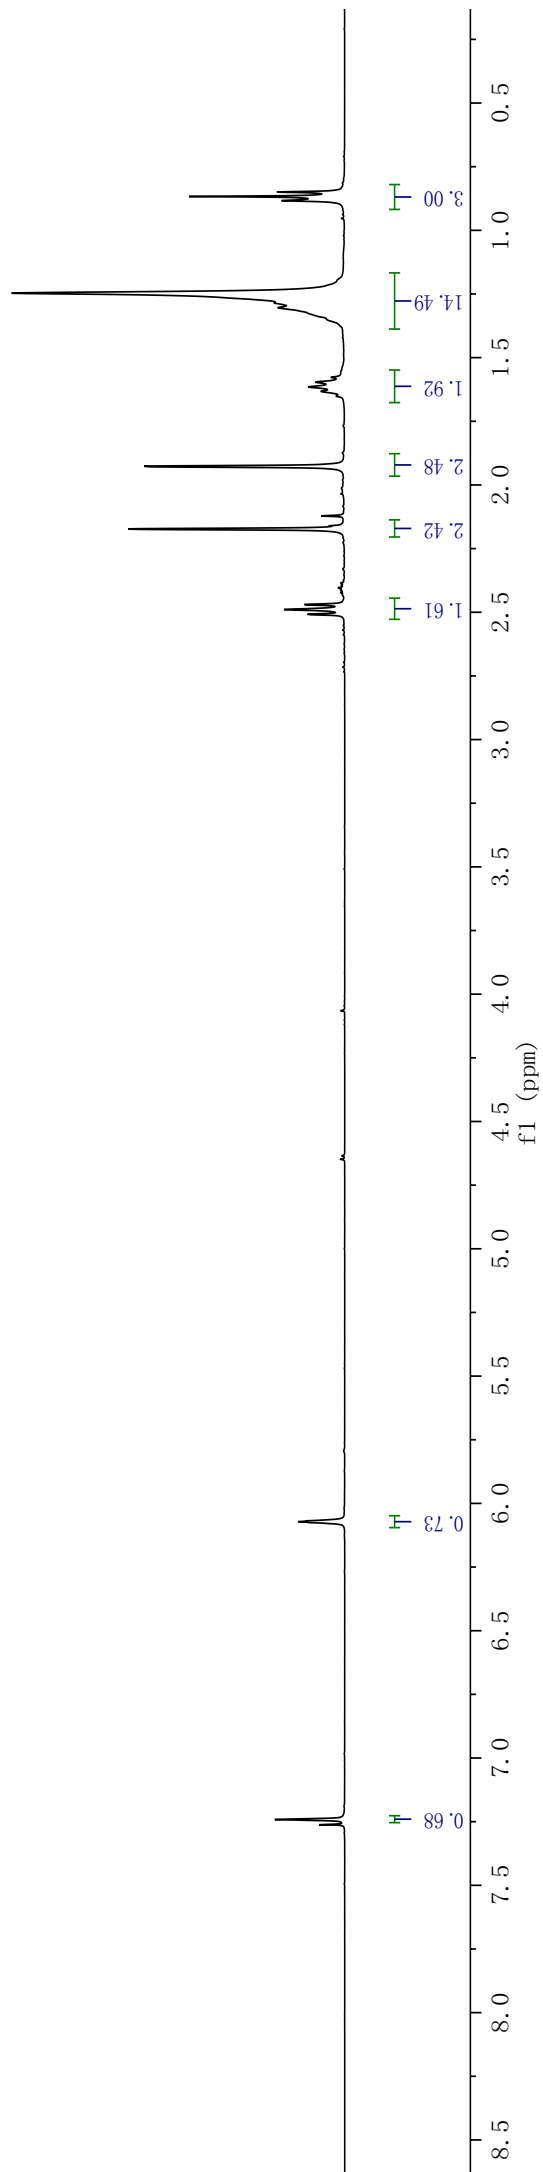

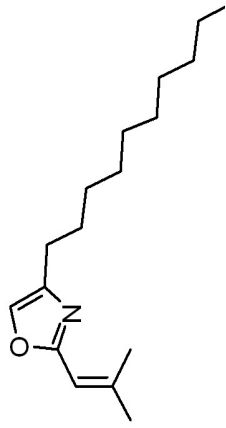

**3k**

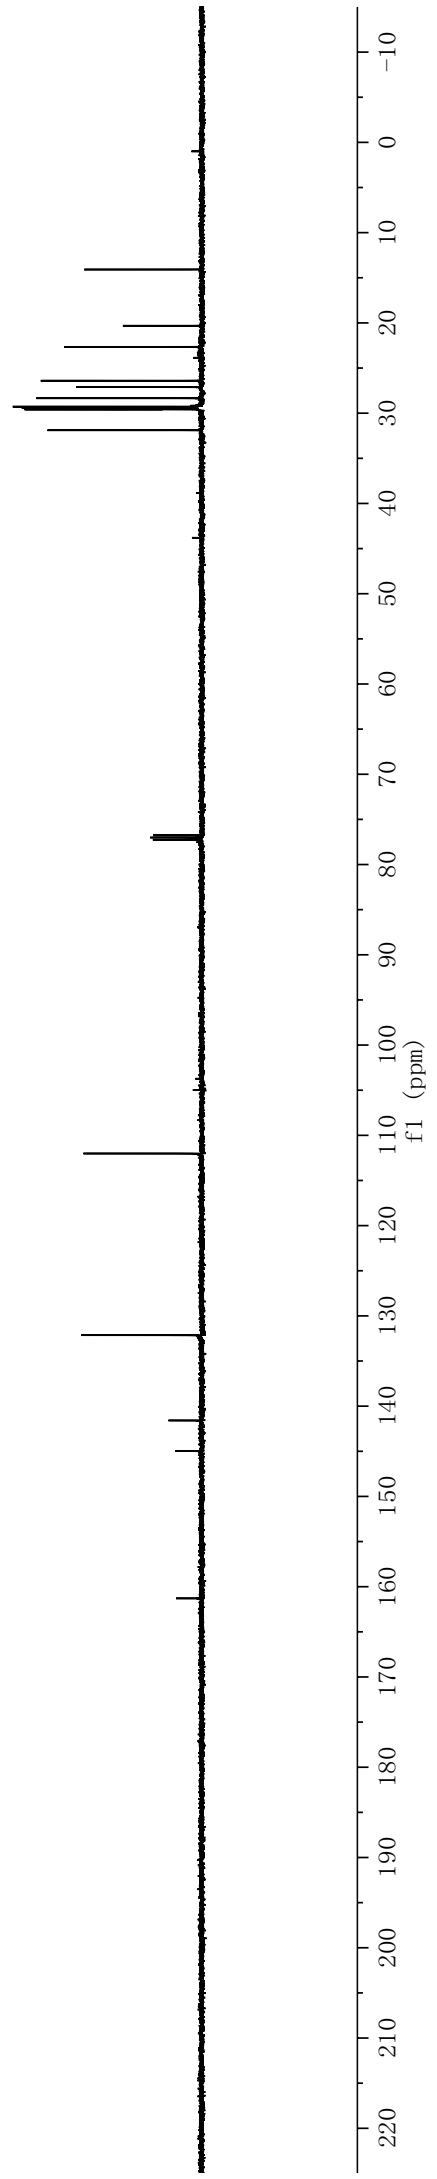

Title lyd-3-225  
Solvent CDCl3  
Spectrometer Frequency 499.86

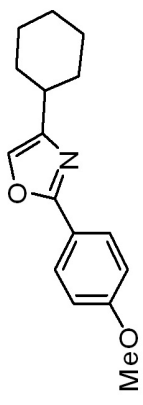

31

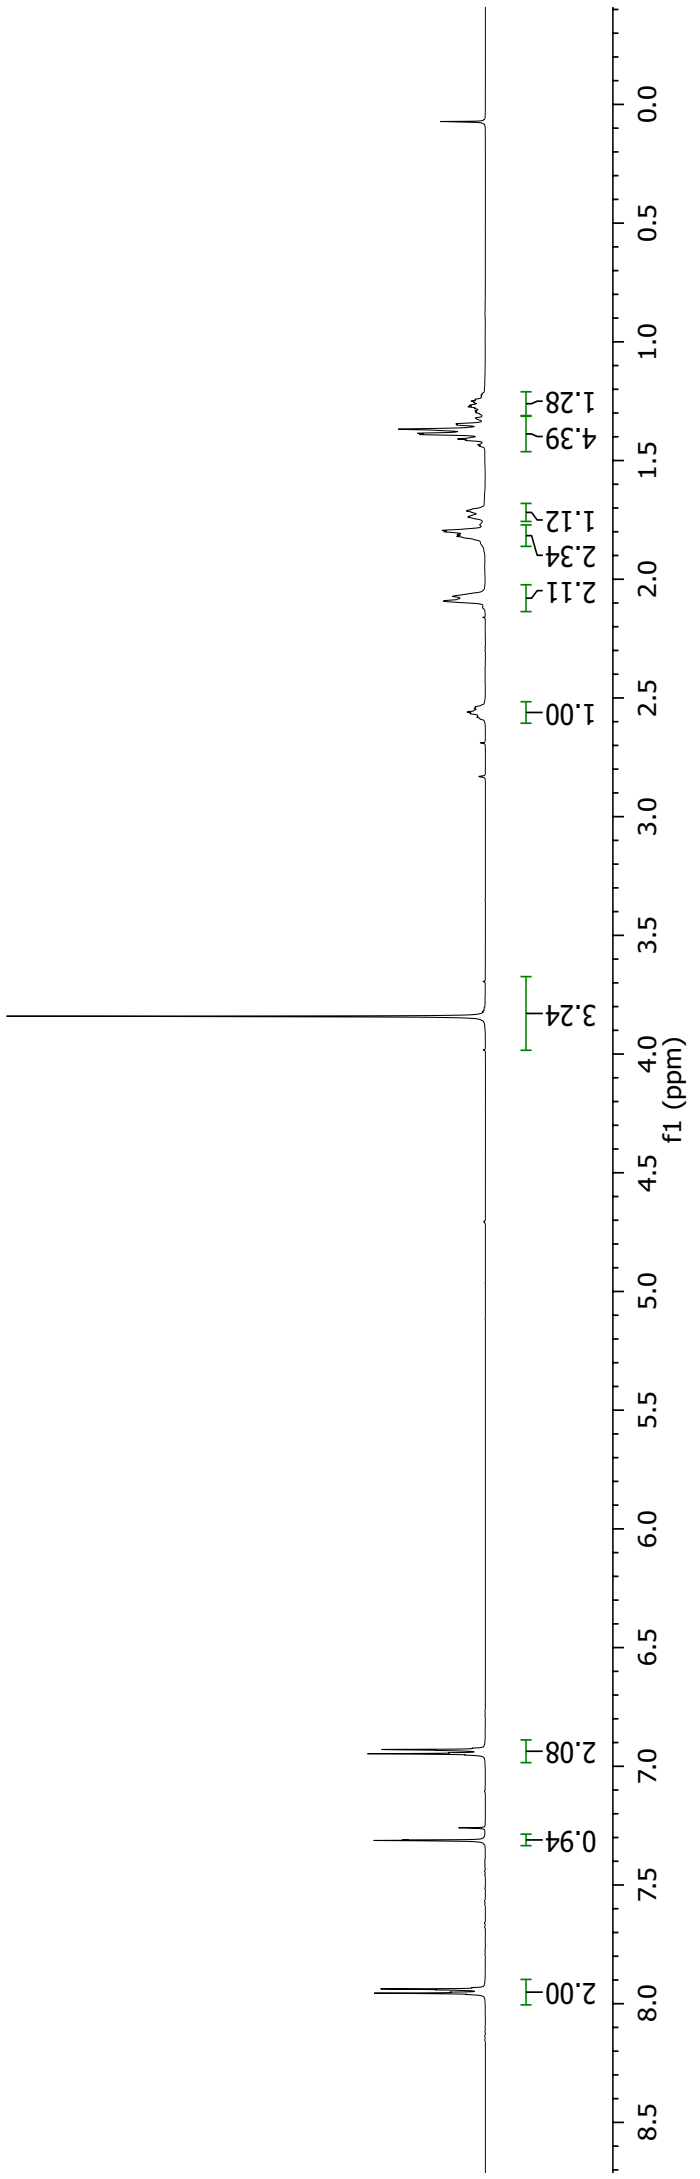

Title lyd-3-225-C  
Solvent CDCl3  
Spectrometer Frequency 125.70

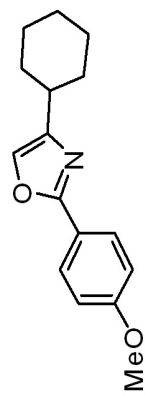

**3I**

S59

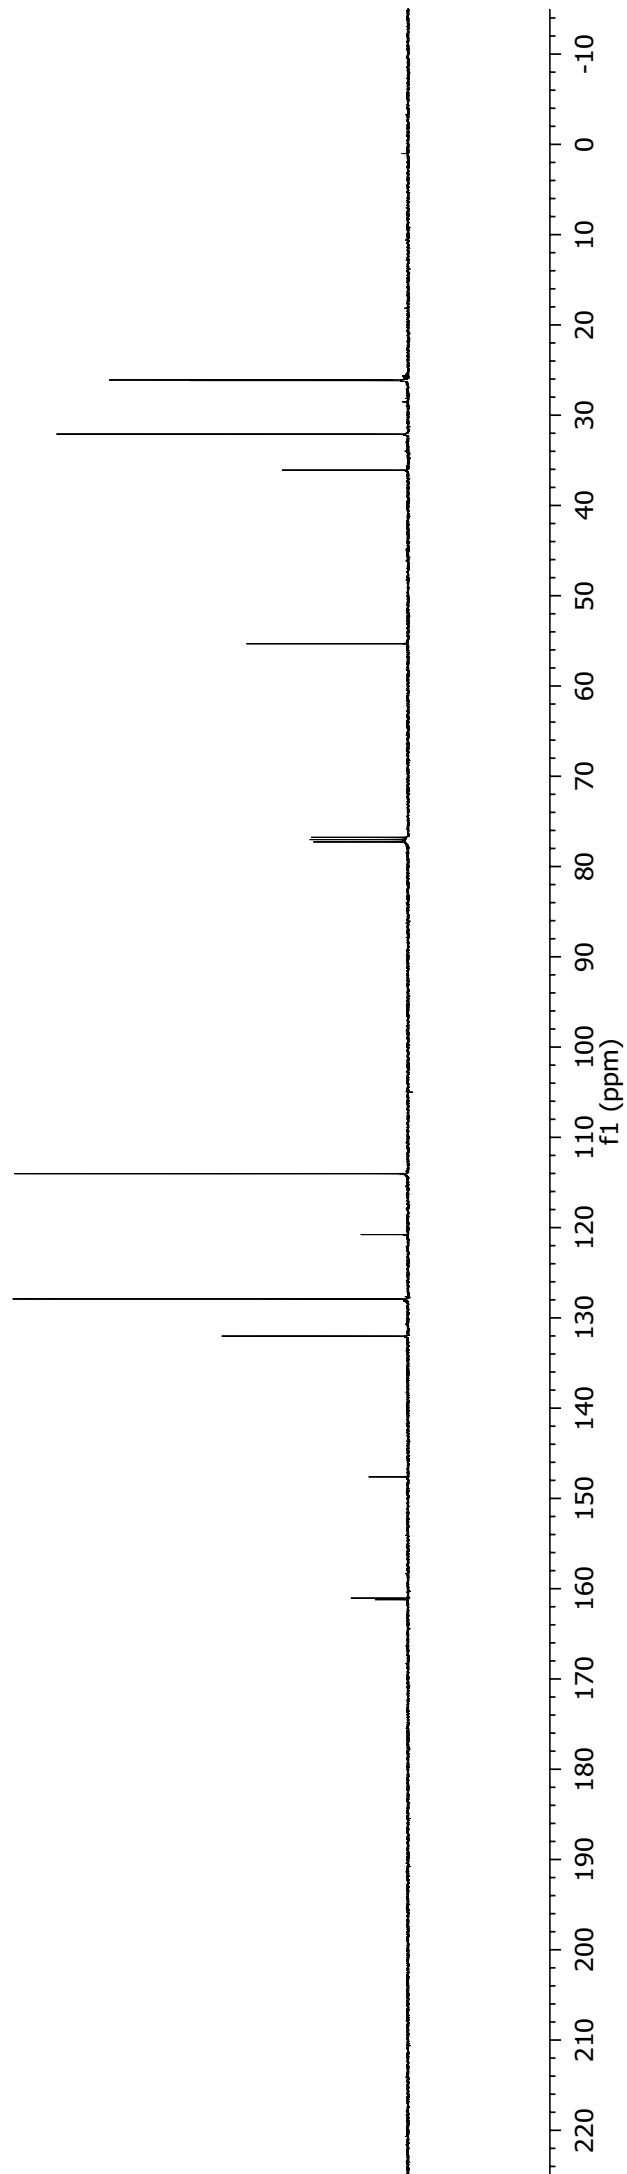

Title lyd-3-226-1-pro  
Solvent CDCl3  
Spectrometer Frequency 499.86

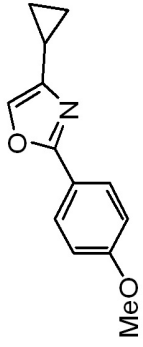

3m

S60

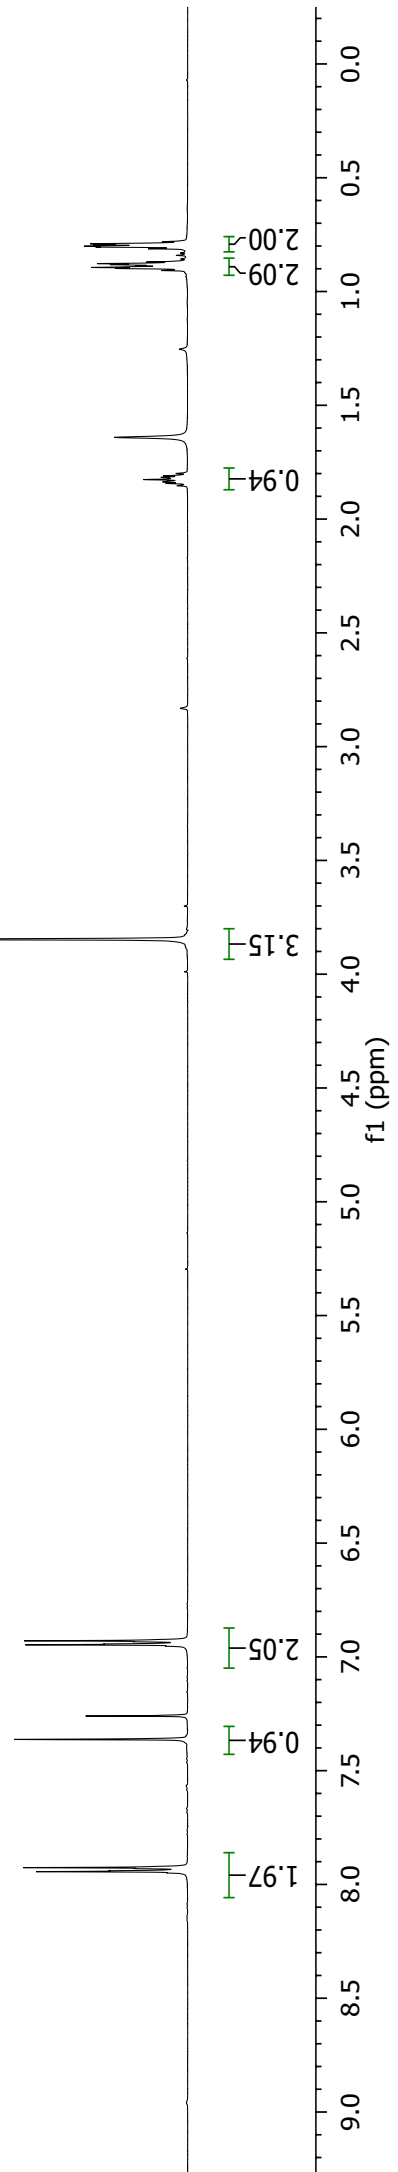



| Parameter                | Value             |
|--------------------------|-------------------|
| 1 Title                  | lyd-3-226-1-pro-C |
| 2 Solvent                | CDCl3             |
| 3 Spectrometer Frequency | 125.70            |

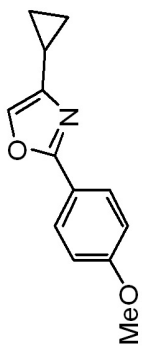

**3m**

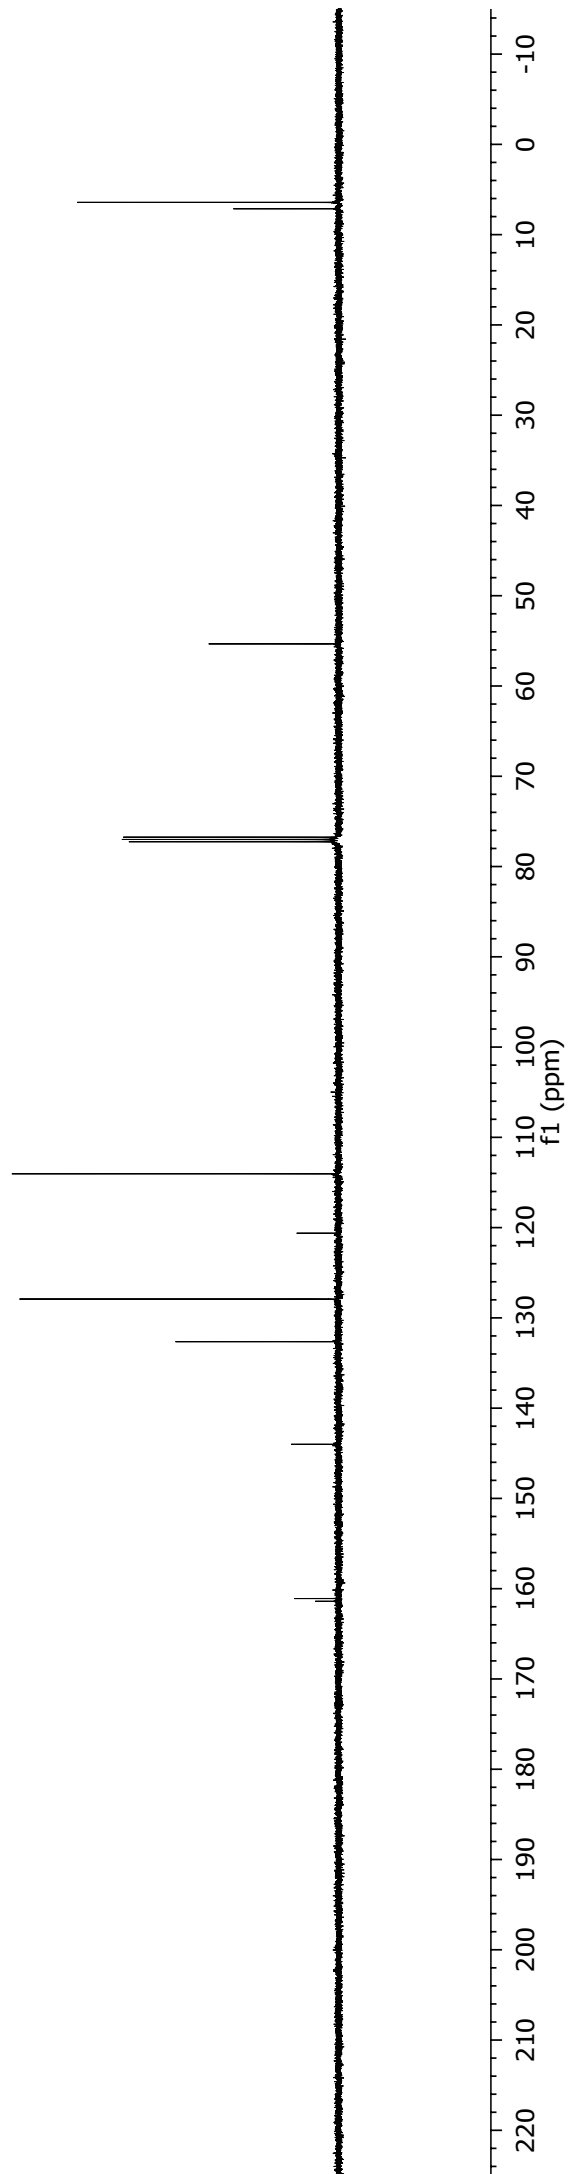

Title lyd-3-228-2-pure  
Solvent CDCl3  
Spectrometer Frequency 499.86

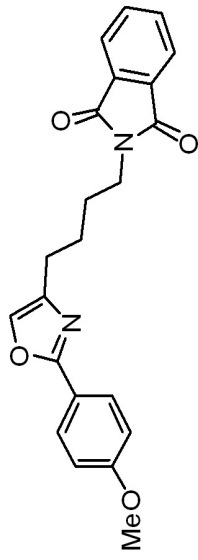

**3n**

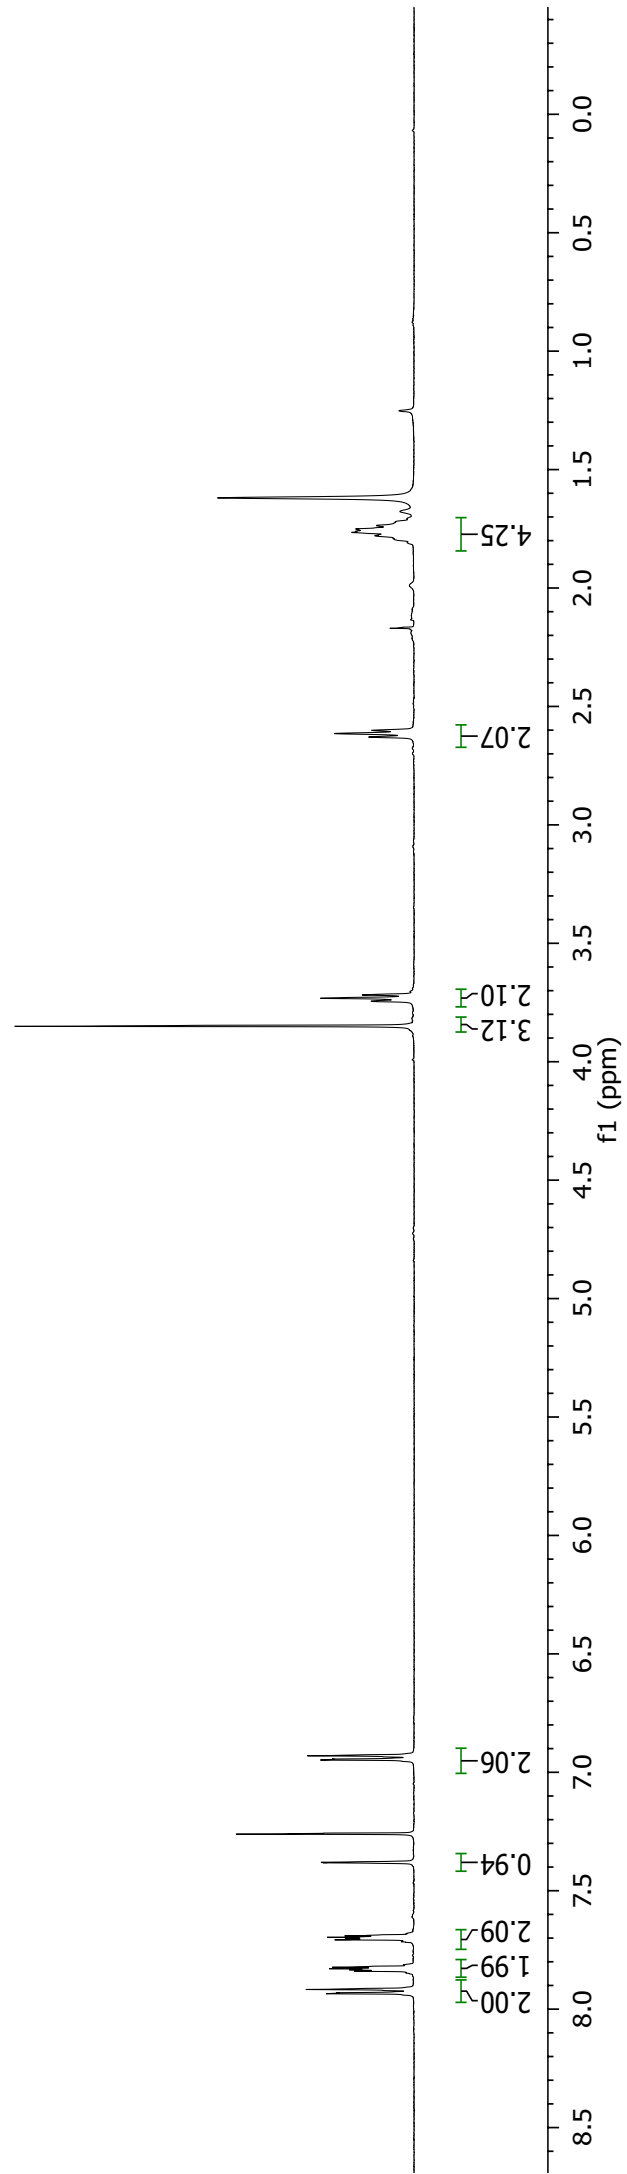

Title lyd-3-228-2-pure-C  
Solvent CDCl3  
Spectrometer Frequency 125.70

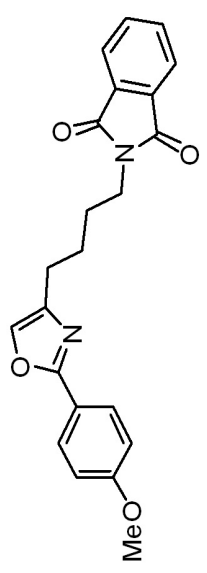

**3n**

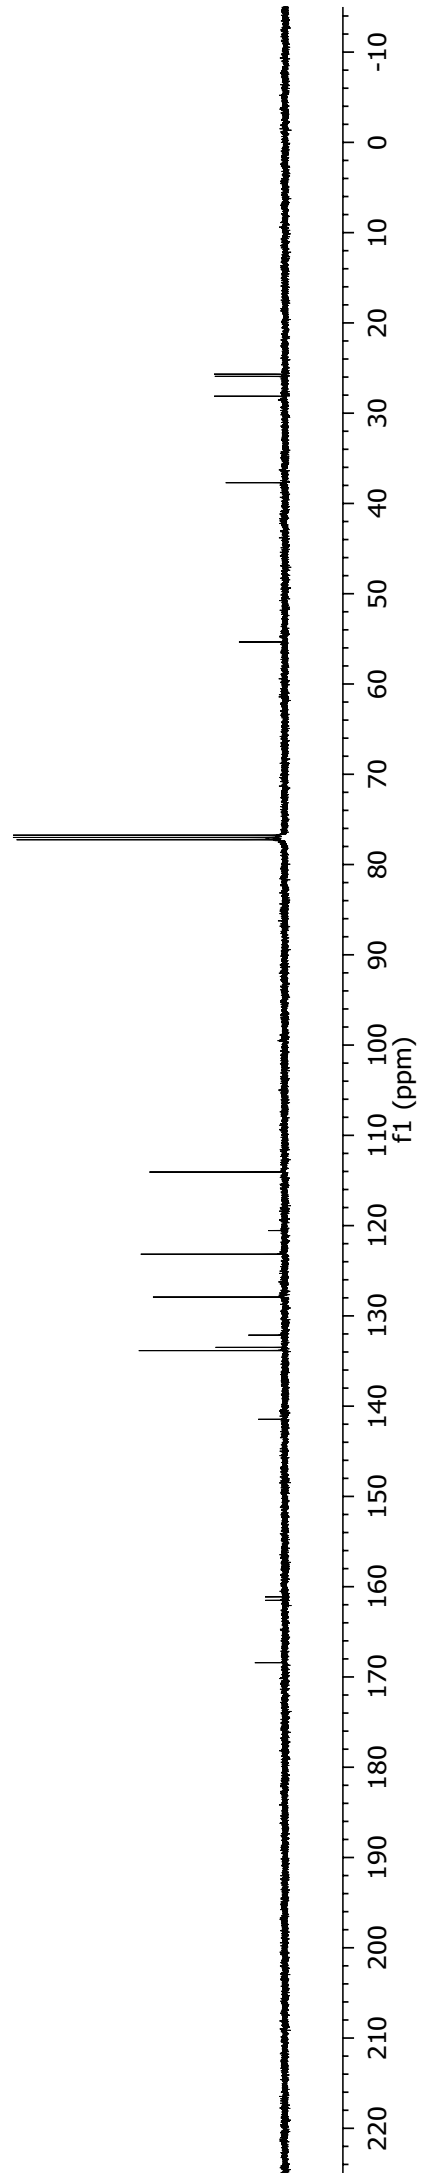

| Parameter                | Value           |
|--------------------------|-----------------|
| 1 Title                  | lyd-3-232-2-pro |
| 2 Solvent                | CDCl3           |
| 3 Spectrometer Frequency | 499.86          |

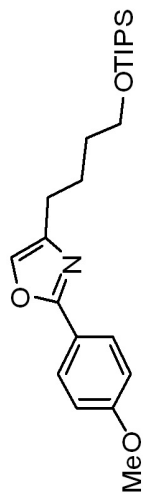

**30**

S64

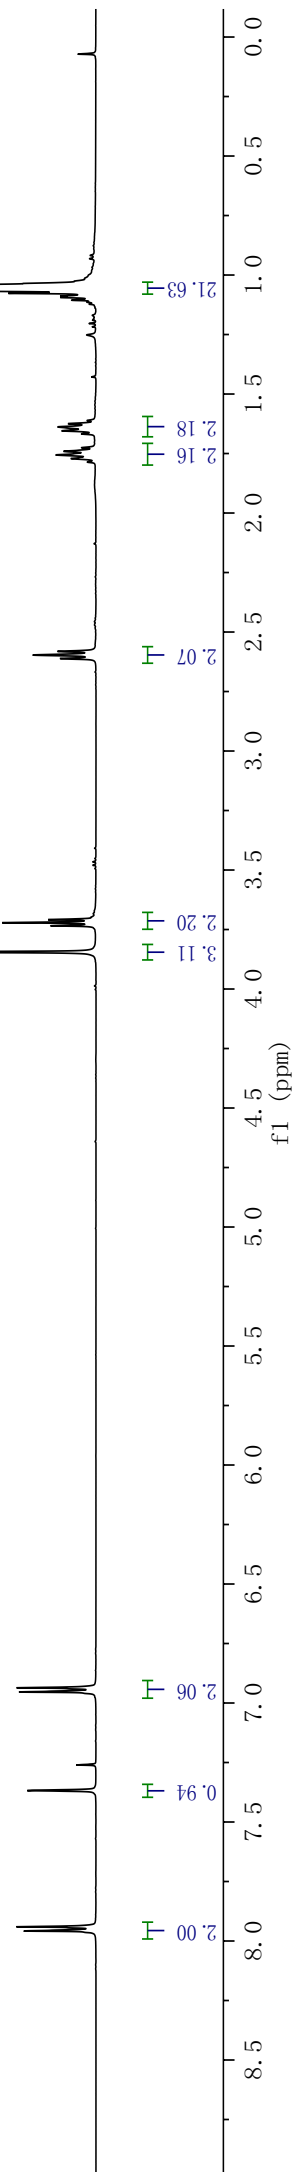

| Parameter                | Value          |
|--------------------------|----------------|
| 1 Title                  | lyd-3-211-pure |
| 2 Solvent                | CDCl3          |
| 3 Spectrometer Frequency | 499.86         |

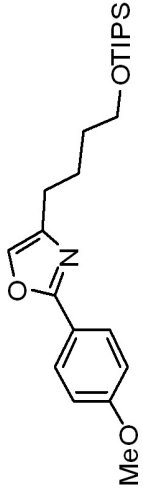

**30**

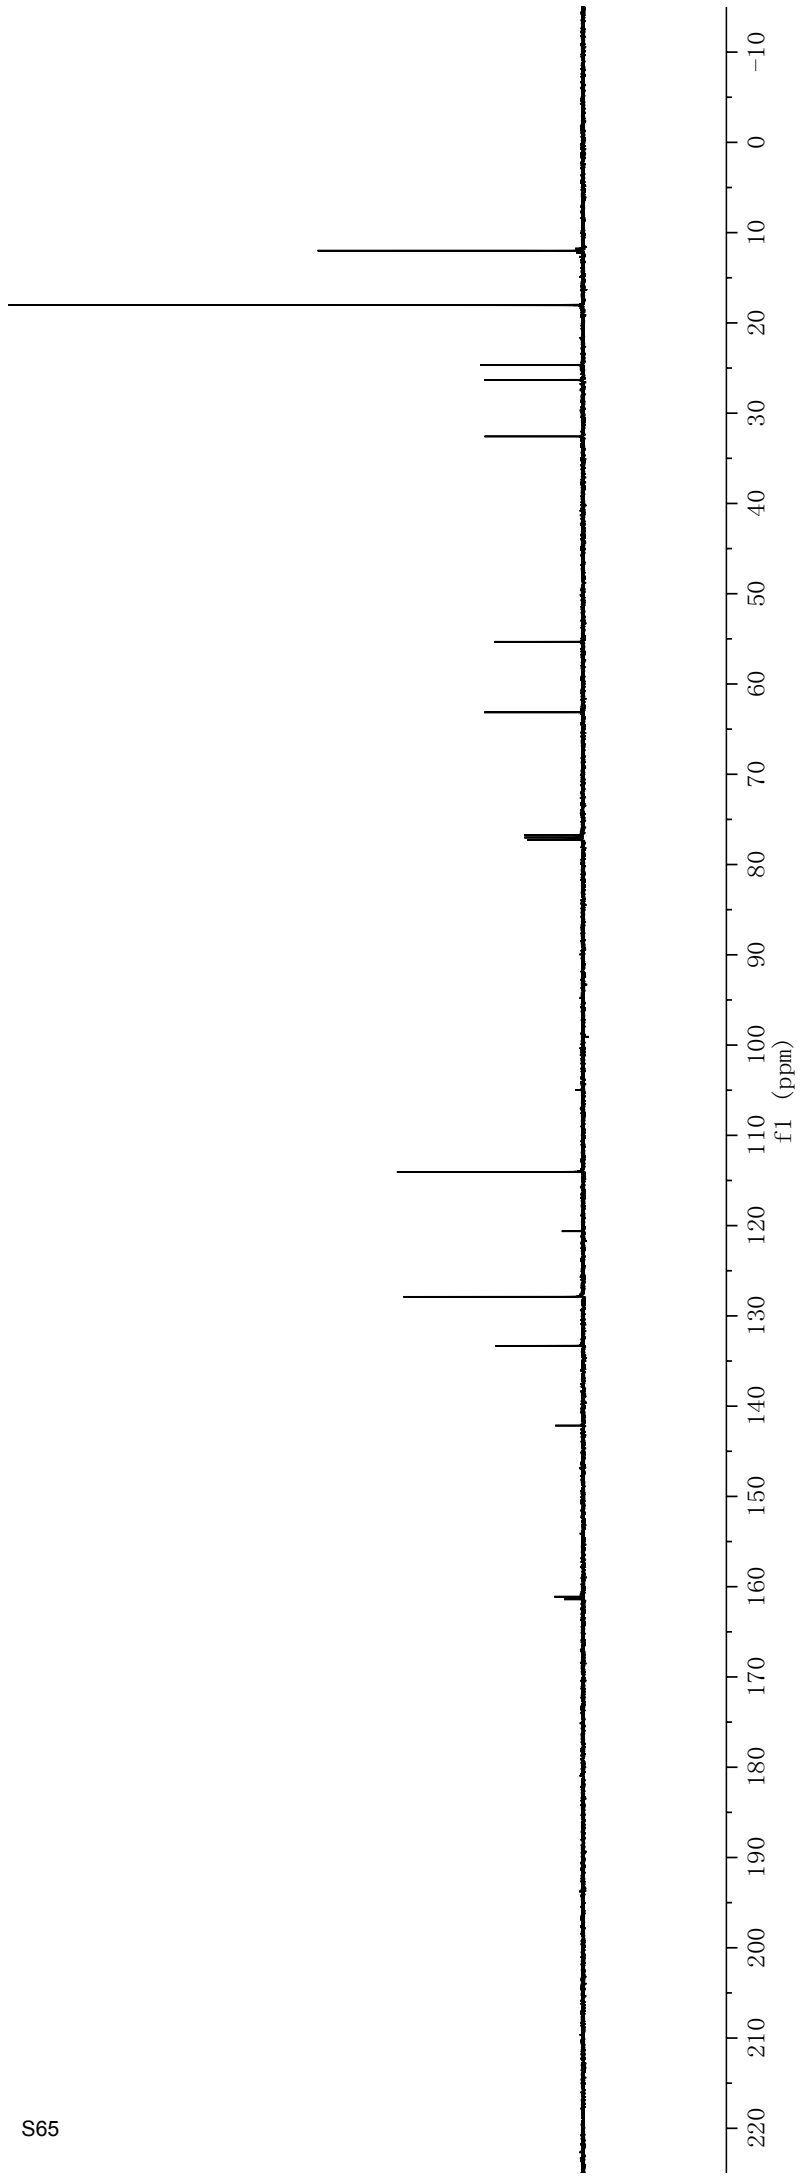

| Parameter                | Value          |
|--------------------------|----------------|
| 1 Title                  | lyd-3-241-pure |
| 2 Solvent                | CDCl3          |
| 3 Spectrometer Frequency | 499.86         |

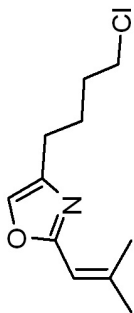

**3p**

S66

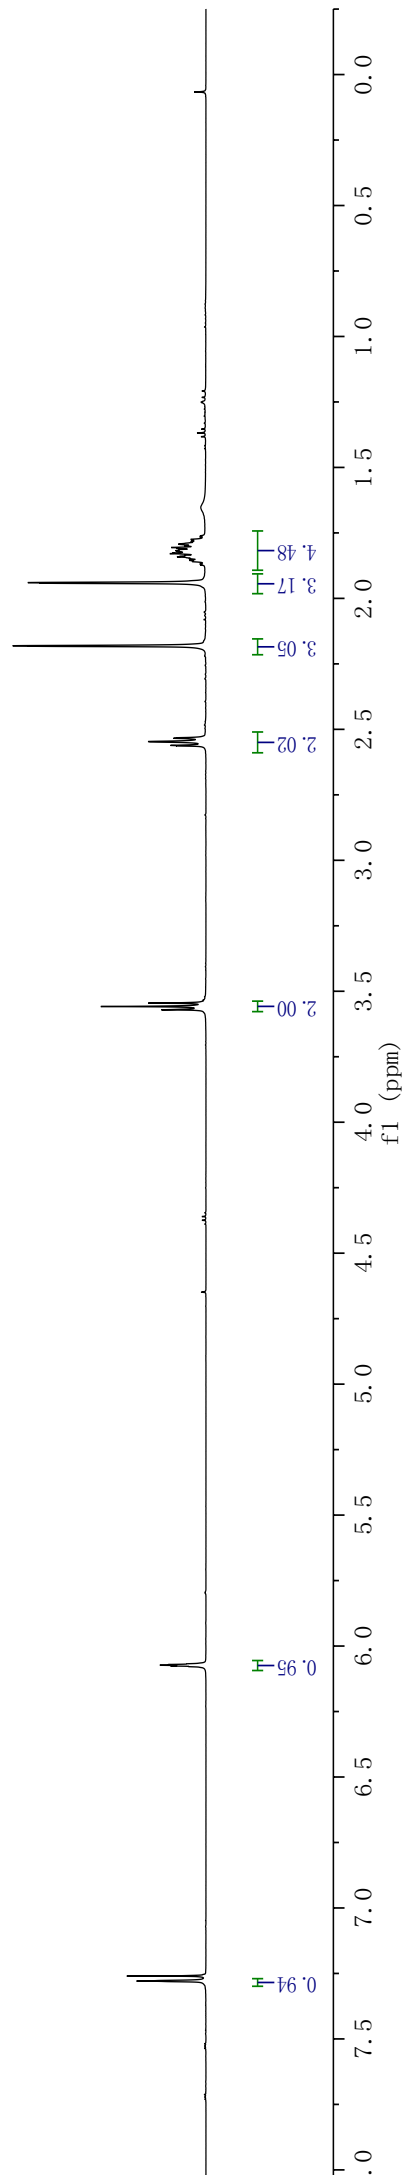

| Parameter                | Value            |
|--------------------------|------------------|
| 1 Title                  | lyd-3-241-pure-C |
| 2 Solvent                | CDCl3            |
| 3 Spectrometer Frequency | 125.70           |



**3p**

S67

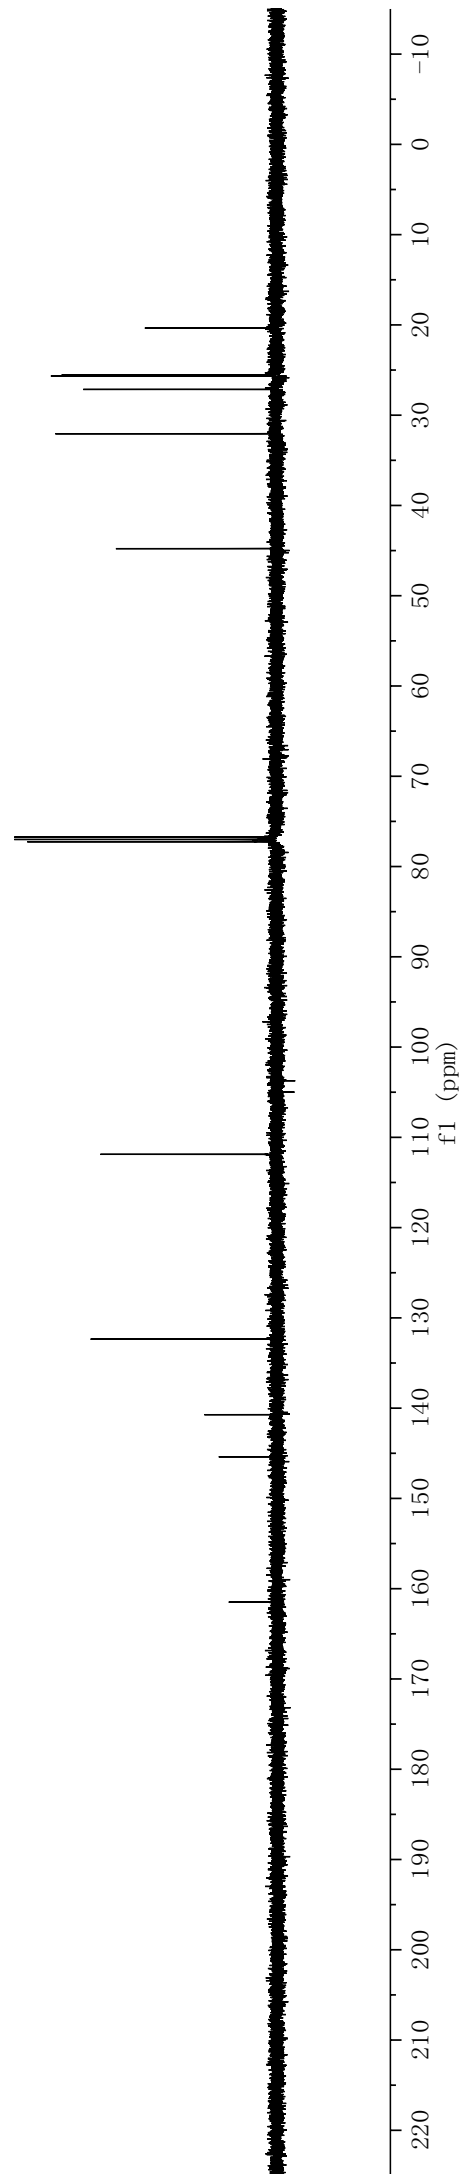

Title lyd-3-216-pure  
Solvent CDCl3  
Spectrometer Frequency 499.86

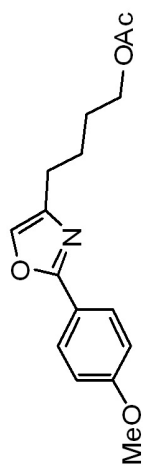

**3q**

S68

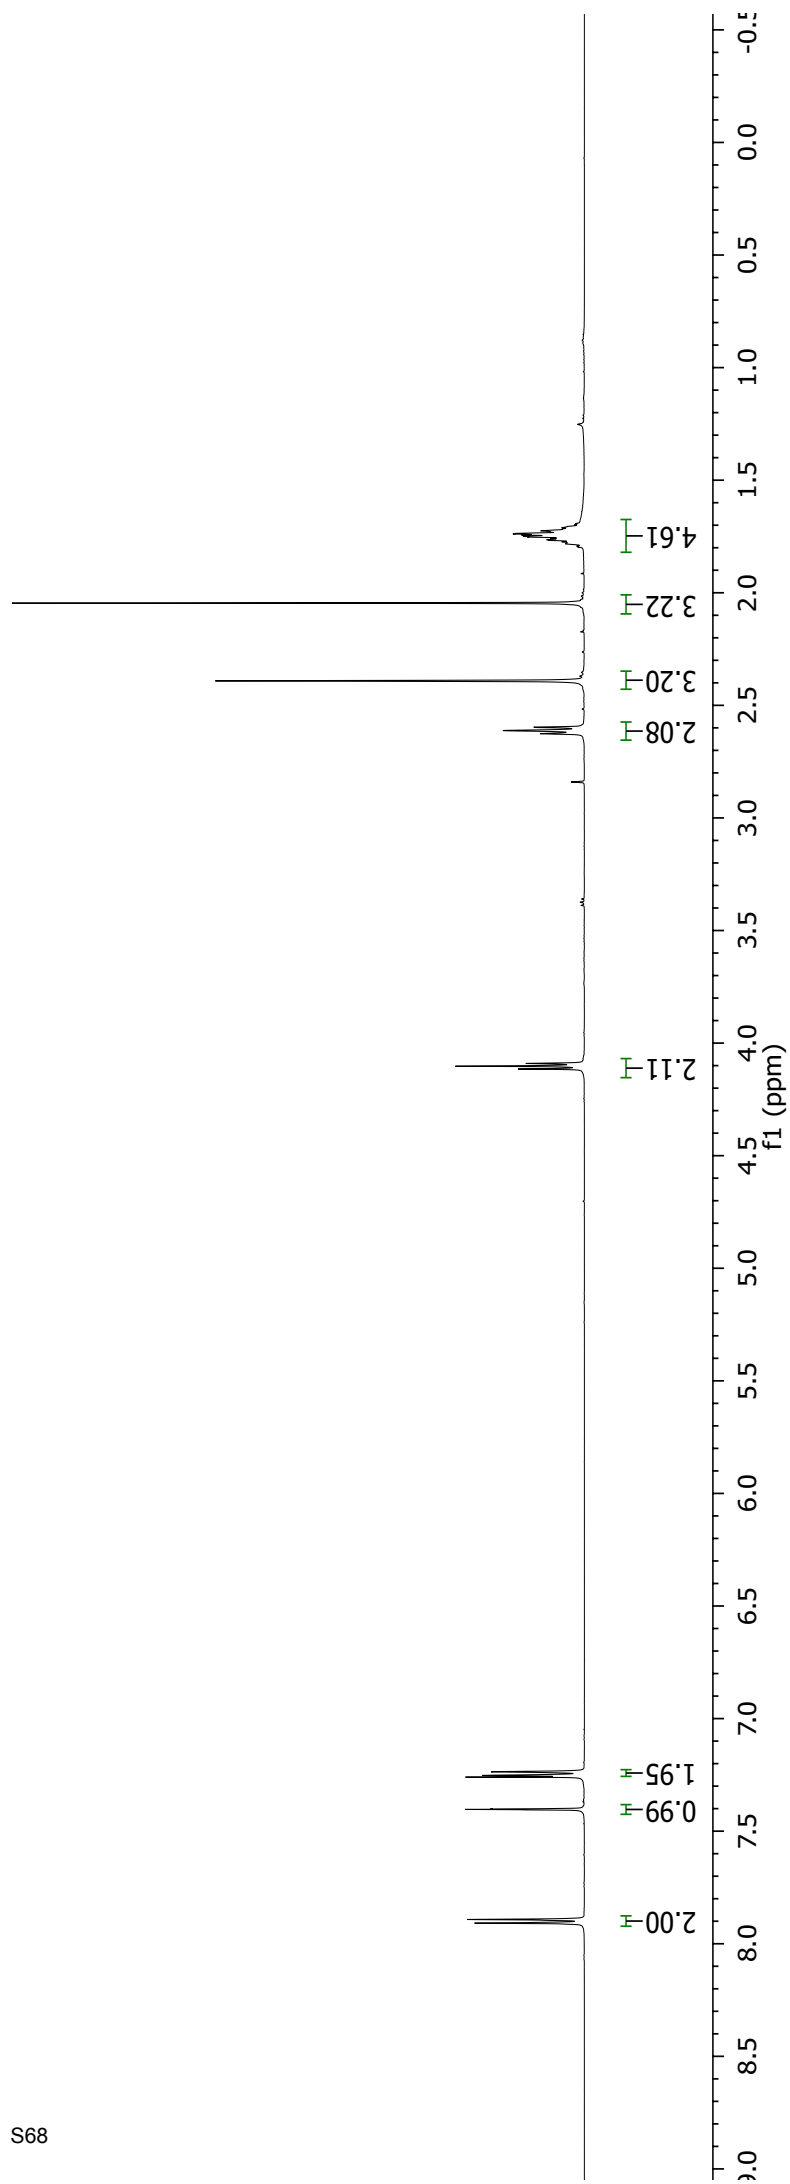



Title lyd-3-216-pure-C  
Solvent CDCl3  
Spectrometer Frequency 125.70

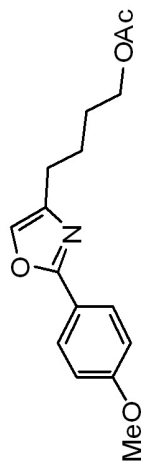

**3q**

S69

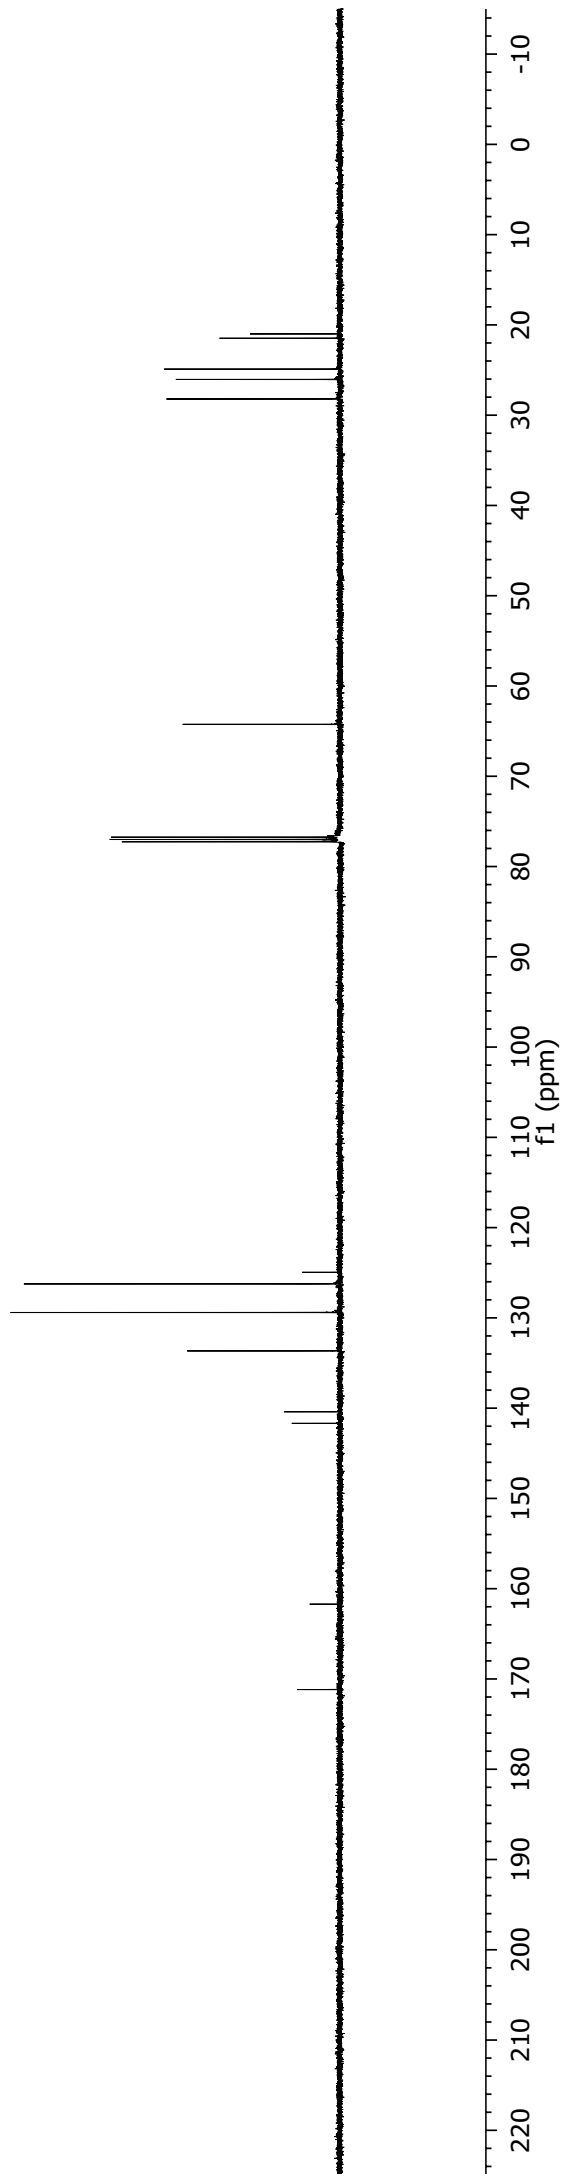

Title lyd-3-228-1-pro  
Solvent CDCl3  
Spectrometer Frequency 499.86

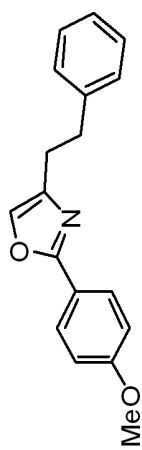

**3r**

S70

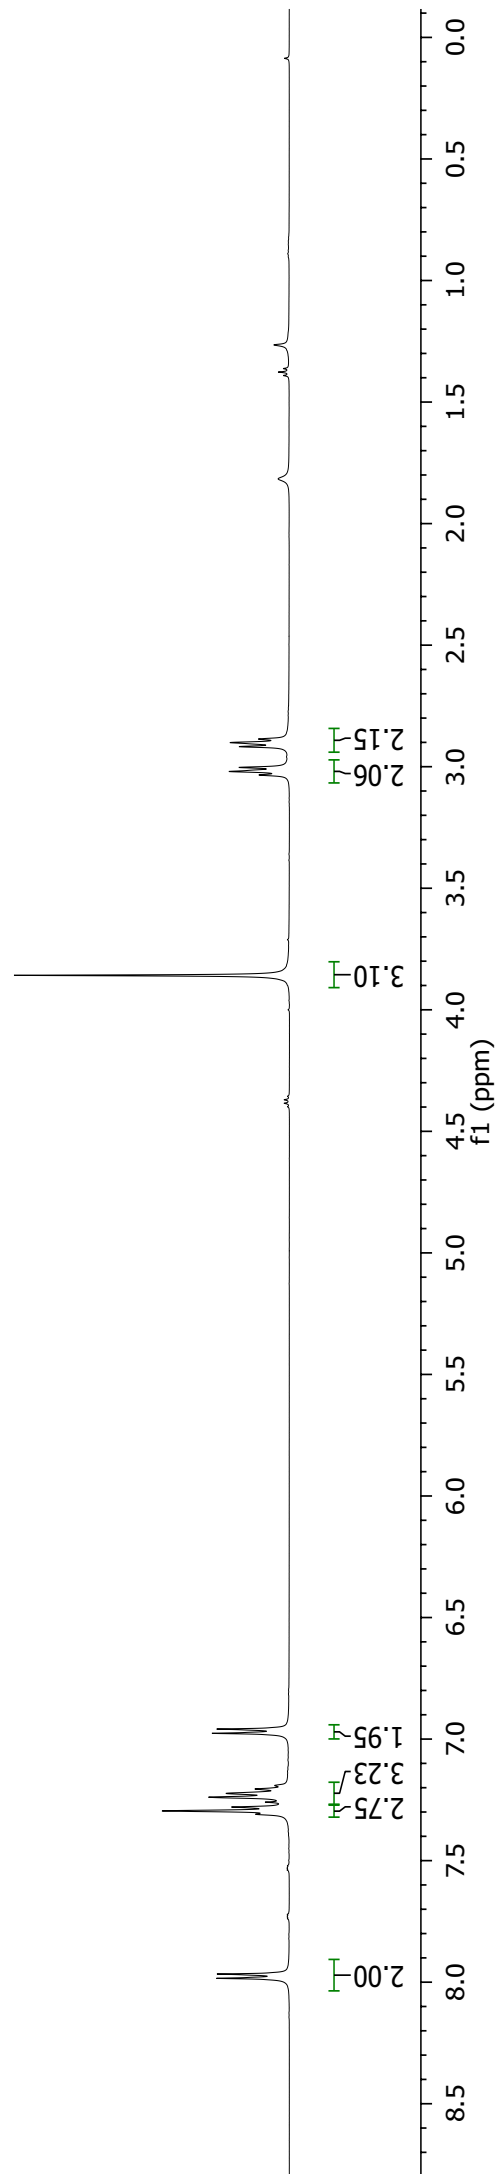

Title lyd-3-228-1-pure-C  
Solvent CDCl3  
Spectrometer Frequency 125.70

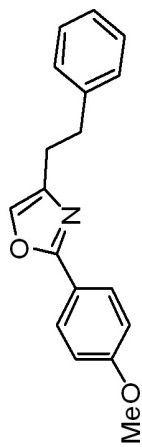

**3r**

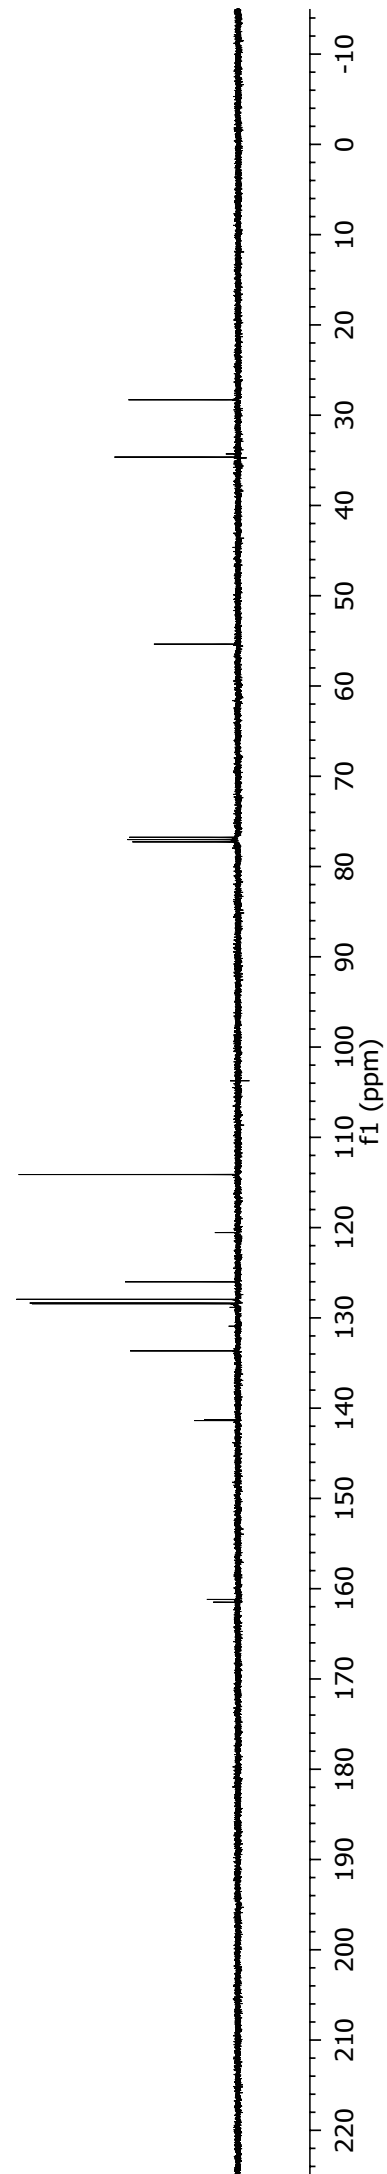

Title lyd-3-115-1-pro-pure  
Solvent cdcl3  
Spectrometer Frequency 599.63

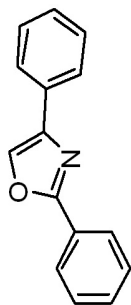

3s

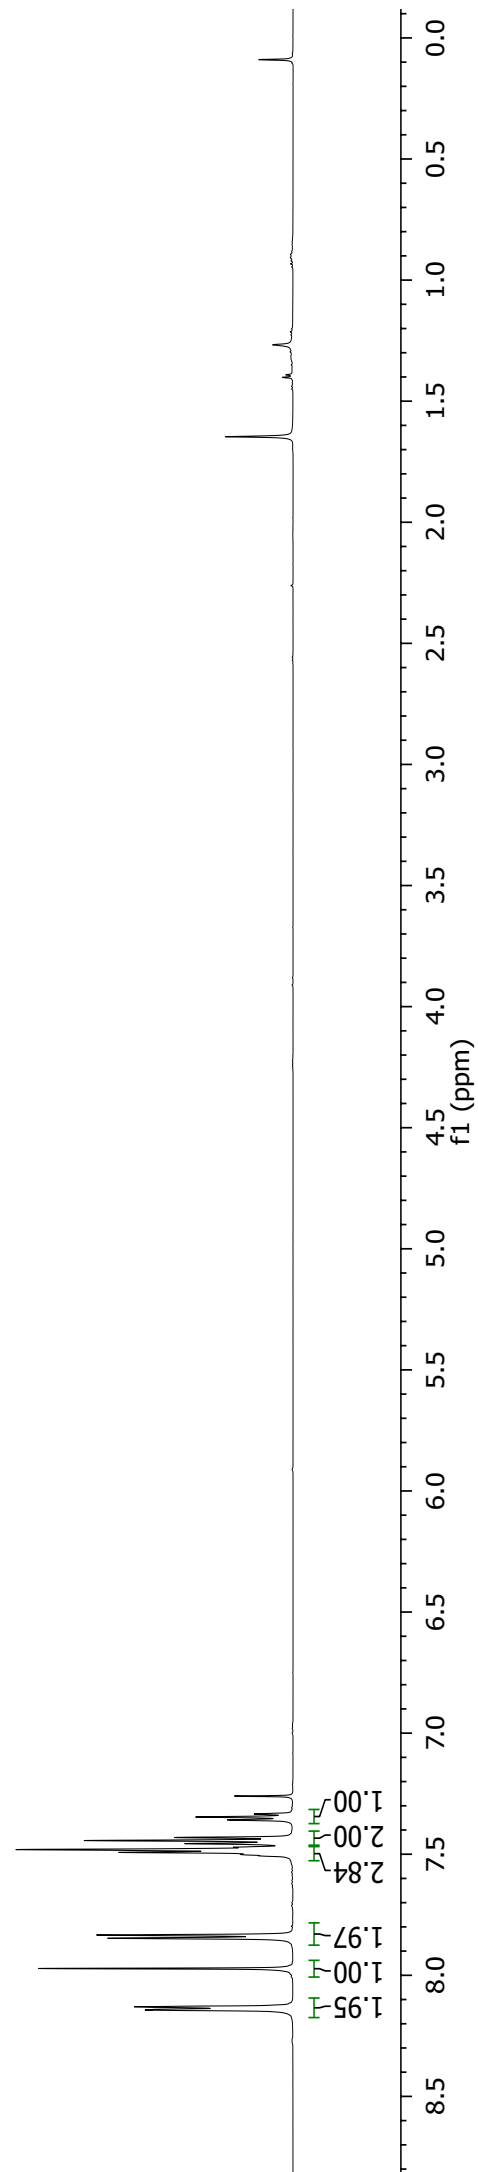

Title lyd-3-115-pro-pure-c  
Solvent cdcl3  
Spectrometer Frequency 150.79

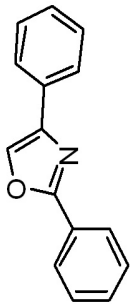

3s

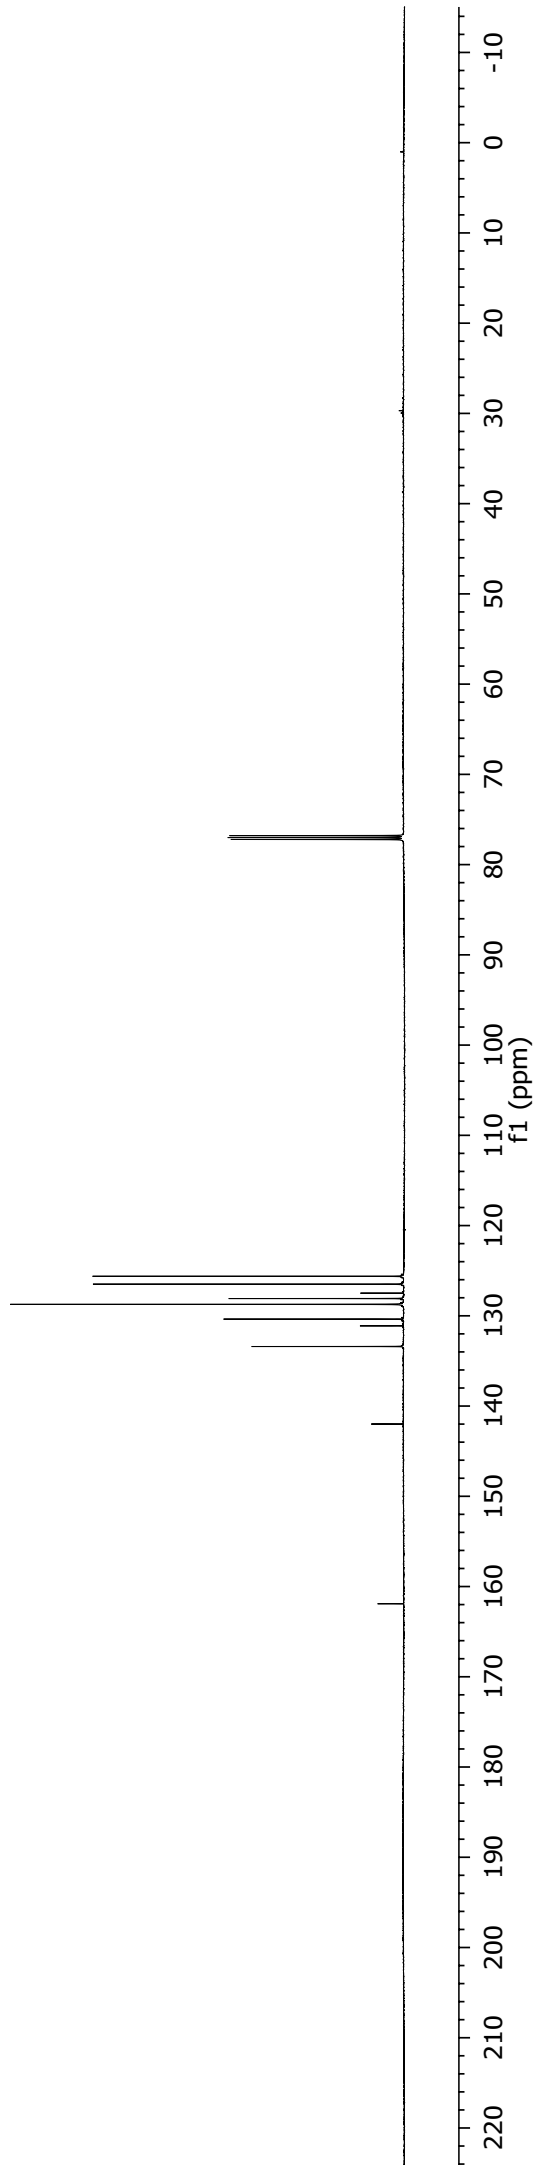

Title lyd-3-214  
Solvent CDCl3  
Spectrometer Frequency 499.86

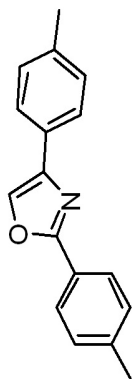

3t

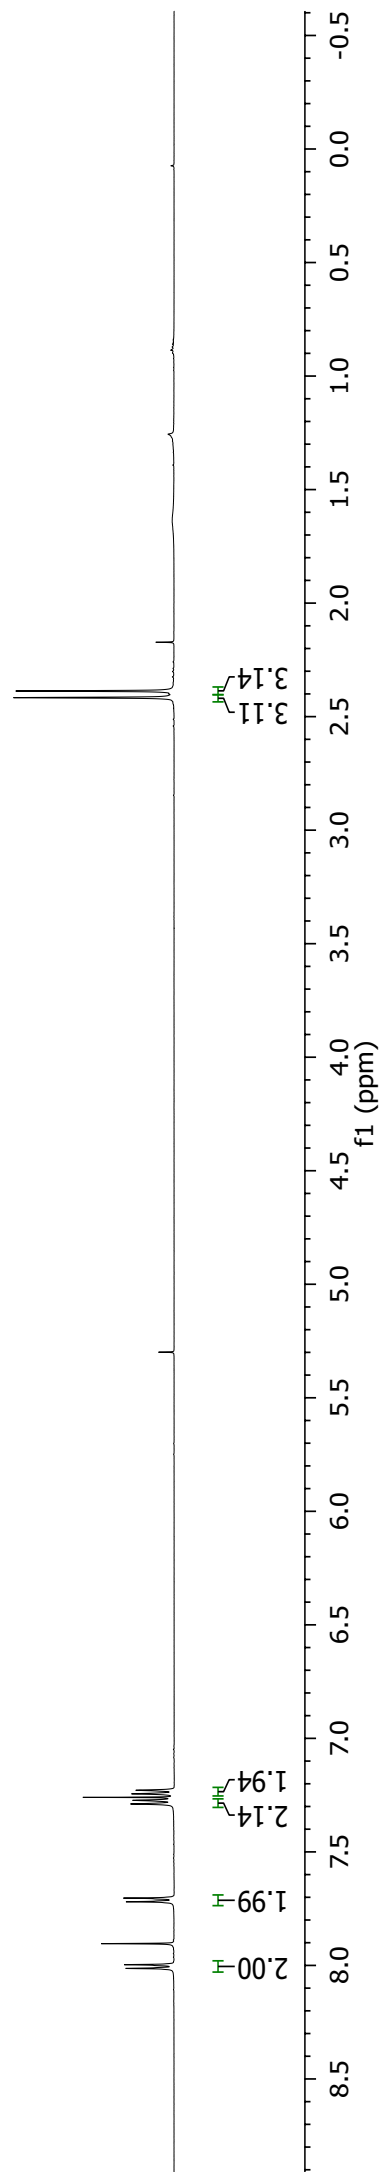

Title lyd-3-214-C  
Solvent CDCl3  
Spectrometer Frequency 125.70

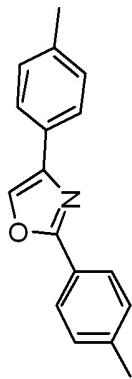

3t

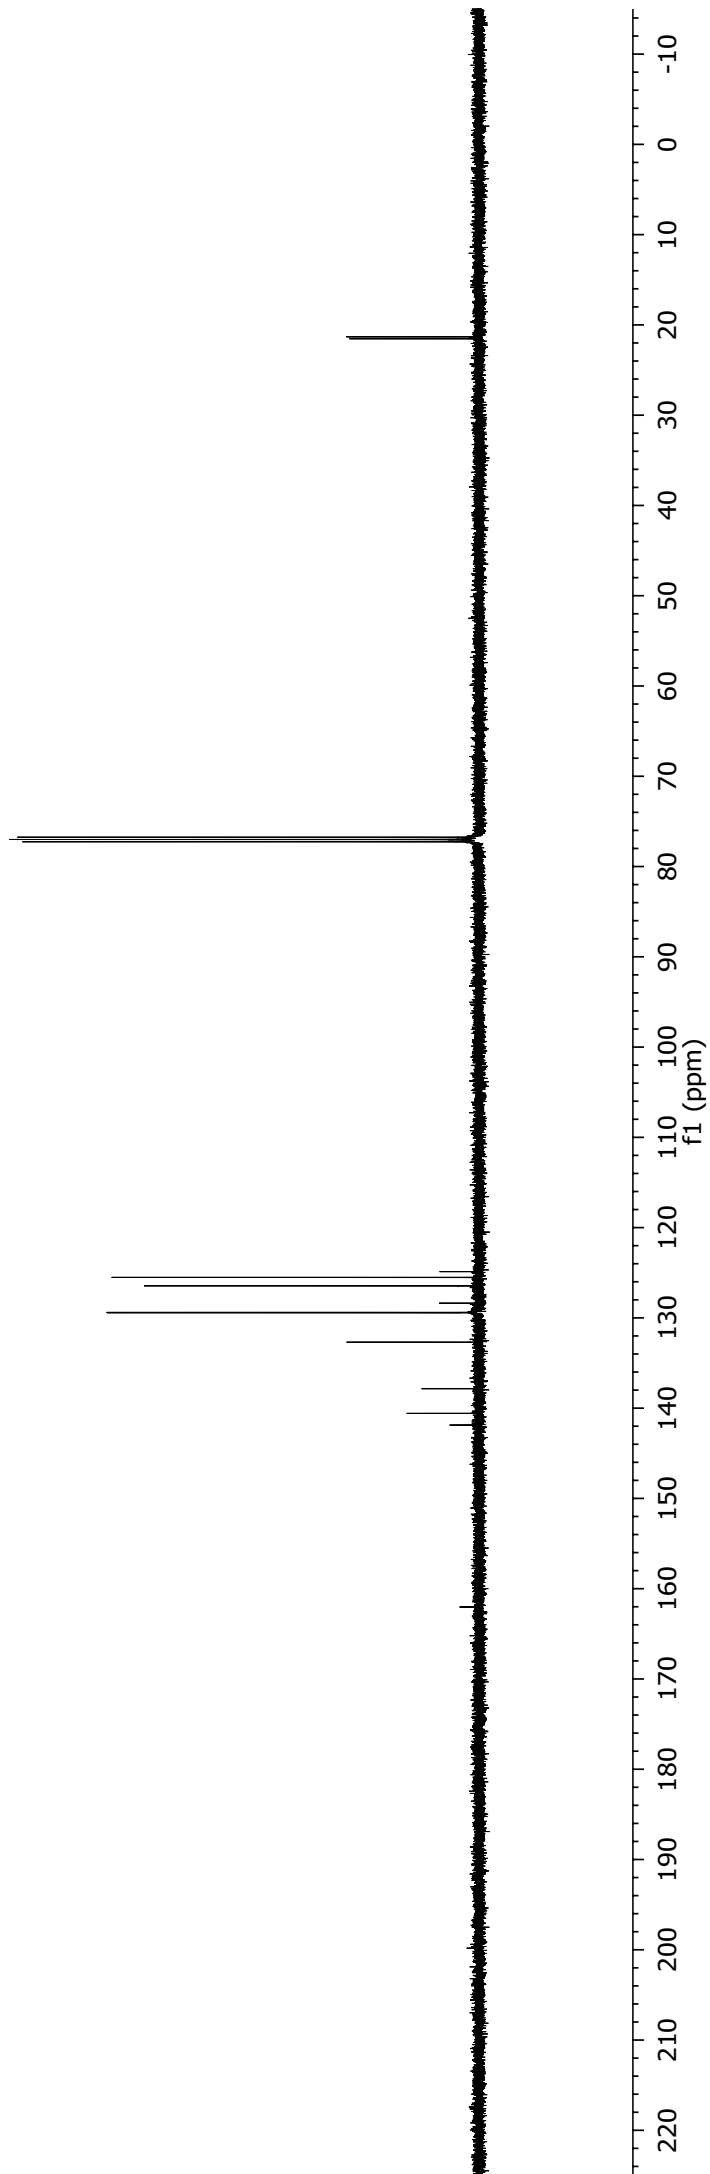

Title lyd-3-224  
Solvent CDCl3  
Spectrometer Frequency 499.86

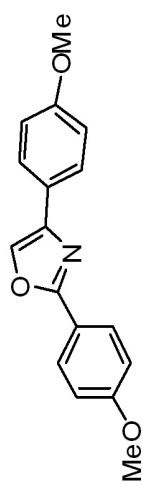

**3u**

S76

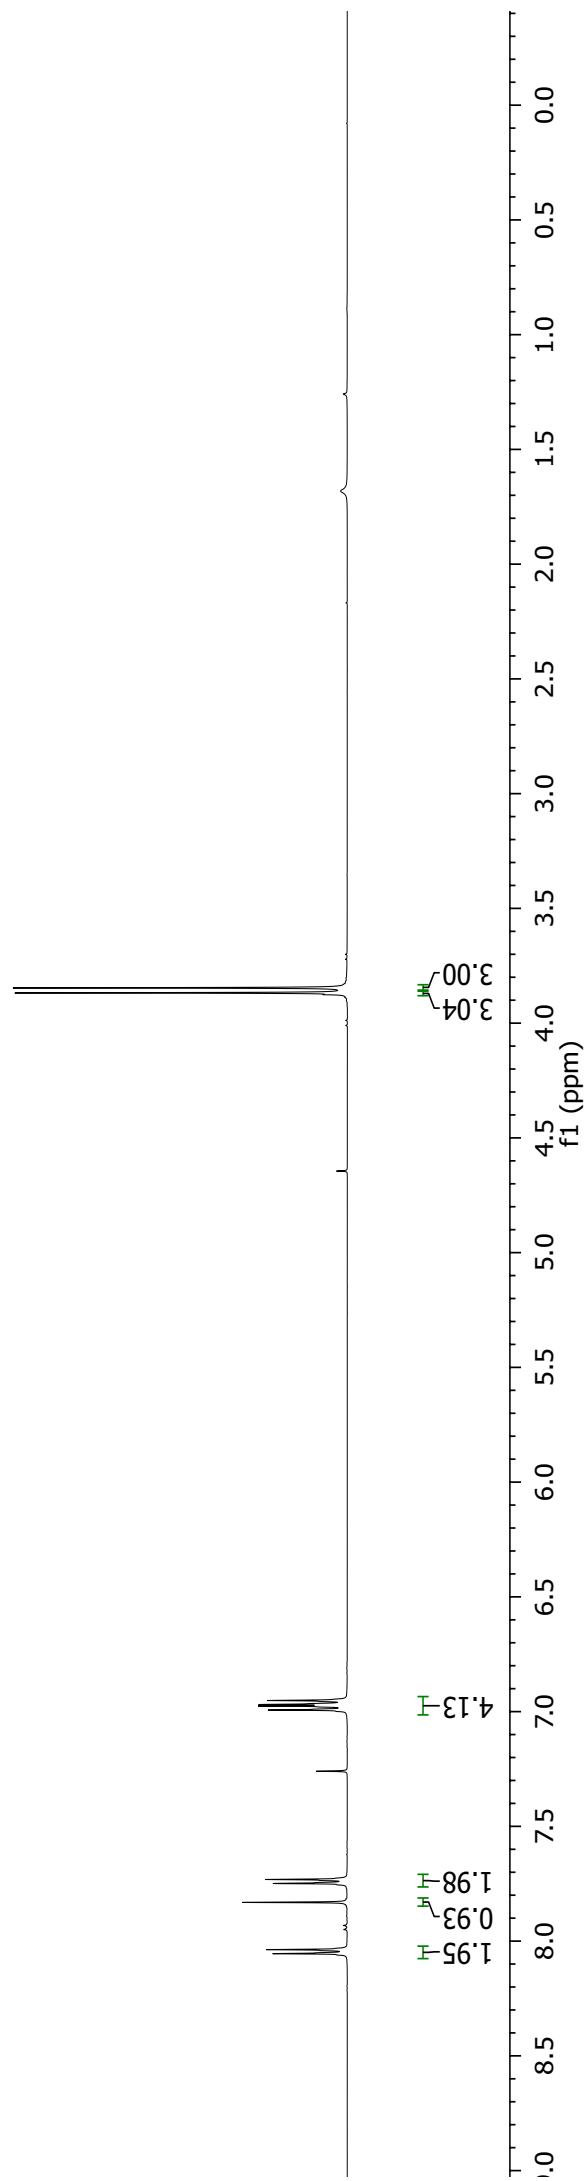



| Parameter                | Value         |
|--------------------------|---------------|
| 1 Title                  | lyd-3-224-C-2 |
| 2 Solvent                | CDCl3         |
| 3 Spectrometer Frequency | 125.70        |

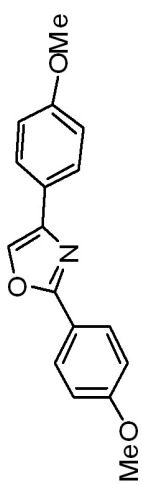

**3u**

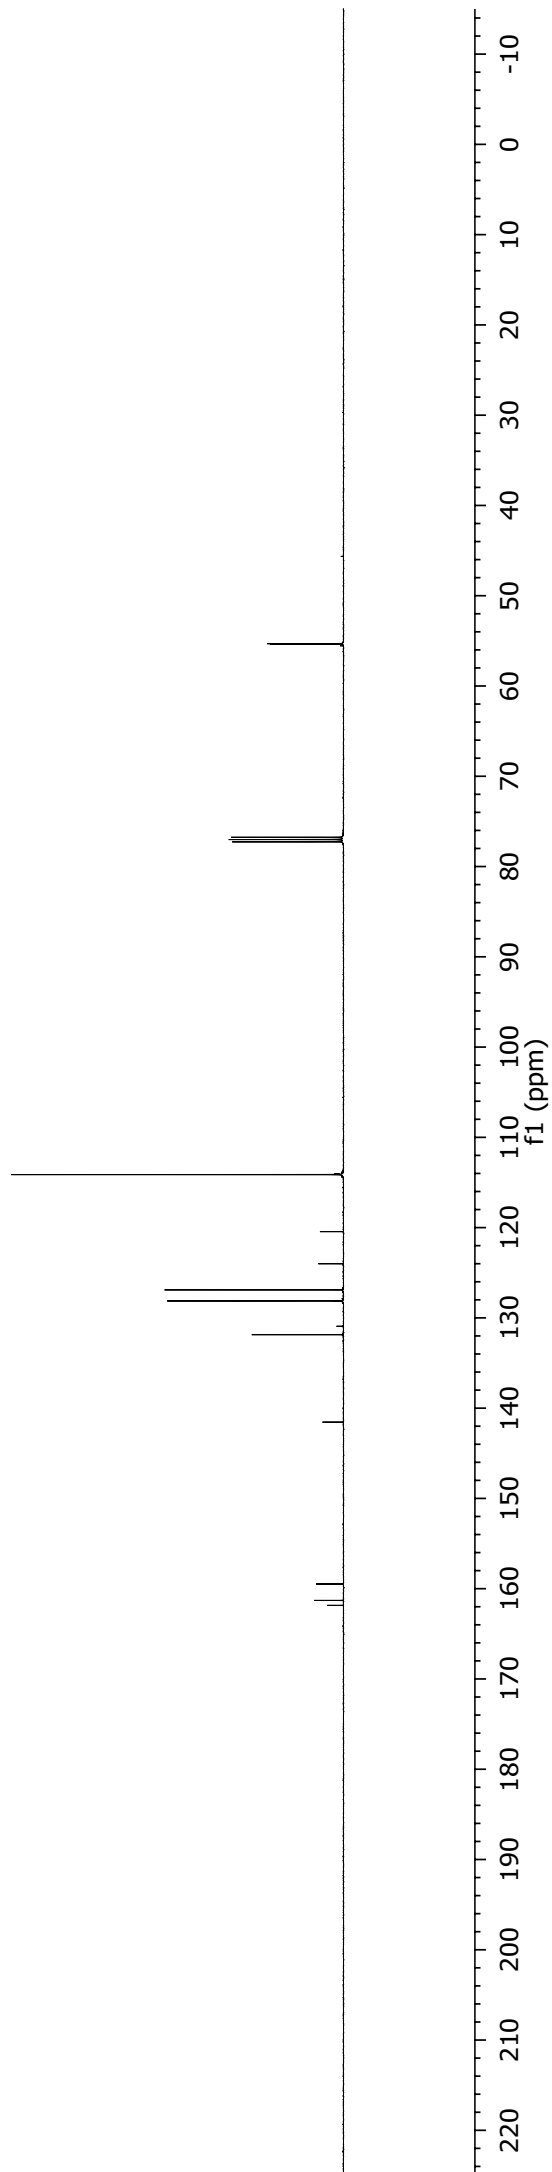

Supplement: NIHMS413986-supplement-1_si_001.pdf [file NIHMS413986-supplement-1_si_001.pdf]
